# Supplementary material for: An investigation to assess ankle mobility in healthy individuals from the application of multi-component compression bandages and compression hosiery
Source: J Foot Ankle Res. 2016 Jul 7;9:18. doi: 10.1186/s13047-016-0151-8 (PMC4936284; doi:10.1186/s13047-016-0151-8)
Supplement: Additional file 1: — Raw data from gait investigation. (XLSX 256 kb) [file 13047_2016_151_MOESM1_ESM.xlsx]

## Sheet: Vector for MLWIN
Participant	Age	Gender	BMI	Footwear condition	Typical footwear	Medical footwear	Garment Condition	Bandaging	Hosiery	Assessment	Step	Maximum	Minimum	Range				Key					Age	Gen	BMI
1	31	1	22.4675	1	0	0	1	0	0	1	1	138.468	103.617	34.851				Foot wear condition	1	Barefoot			31	1	22.4675	1
1	31	1	22.4675	1	0	0	1	0	0	1	2	138.94	103.485	35.455					2	Typical footwear			39	1	32.3437	2
1	31	1	22.4675	1	0	0	1	0	0	1	3	140.252	102.661	37.591					3	Medical Footwear			56	1	21.1927	3
1	31	1	22.4675	1	0	0	1	0	0	1	4	139.371	105.001	34.37									20	1	18.4049	4
1	31	1	22.4675	1	0	0	1	0	0	1	5	136.241	101.679	34.562				Garment condition	1	None			37	0	26.7712	5
1	31	1	22.4675	1	0	0	1	0	0	1	6	138.409	103.788	34.621					2	5 layer bandaging			44	1	32.7694	6
1	31	1	22.4675	1	0	0	2	1	0	2	1	129.168	103.657	25.511					3	hoisery			26	0	24.179	7
1	31	1	22.4675	1	0	0	2	1	0	2	2	128.043	104.064	23.979									47	1	38.0142	8
1	31	1	22.4675	1	0	0	2	1	0	2	3	129.81	101.039	28.771									45	0	26.2202	9
1	31	1	22.4675	1	0	0	2	1	0	2	4	129.06	104.726	24.334				N/A	compression bandaging too bulky to fit participant shoe on				29	0	18.7242	10
1	31	1	22.4675	1	0	0	2	1	0	2	5	130.286	104.094	26.192									29	0	25.0928	11
1	31	1	22.4675	1	0	0	2	1	0	2	6	127.153	103.44	23.713									38	1	20.8429	12
1	31	1	22.4675	1	0	0	3	0	1	3	1	132.55	100.831	31.719									59	0	22.6627	13
1	31	1	22.4675	1	0	0	3	0	1	3	2	130.021	99.407	30.614									25	1	37.5149	14
1	31	1	22.4675	1	0	0	3	0	1	3	3	130.131	101.576	28.555									39	1	24.0138	15
1	31	1	22.4675	1	0	0	3	0	1	3	4	135.161	97.997	37.164									46	0	29.3524	16
1	31	1	22.4675	1	0	0	3	0	1	3	5	133.376	103.135	30.241									20	1	19.3294	17
1	31	1	22.4675	1	0	0	3	0	1	3	6	134.528	100.944	33.584									29	0	27.4361	18
1	31	1	22.4675	2	1	0	1	0	0	4	1	134.637	101.71	32.927									33	1	30.0947	19
1	31	1	22.4675	2	1	0	1	0	0	4	2	135.38	100.545	34.835									40	0	22.3863	20
1	31	1	22.4675	2	1	0	1	0	0	4	3	130.072	101.722	28.35									21	1	21.9213	21
1	31	1	22.4675	2	1	0	1	0	0	4	4	137.063	100.208	36.855									30	1	22.8624	22
1	31	1	22.4675	2	1	0	1	0	0	4	5	134.696	101.688	33.008									36	1	32.4886	23
1	31	1	22.4675	2	1	0	1	0	0	4	6	135.475	101.961	33.514									27	1	29.5092	24
1	31	1	22.4675	2	1	0	2	1	0	5	1	131.698	102.187	29.511									26	1	31.2394	25
1	31	1	22.4675	2	1	0	2	1	0	5	2	124.471	102.378	22.093									55	1	37.2615	26
1	31	1	22.4675	2	1	0	2	1	0	5	3	128.141	101.365	26.776									22	1	22.244	27
1	31	1	22.4675	2	1	0	2	1	0	5	4	130.981	101.458	29.523									44	1	24.9649	28
1	31	1	22.4675	2	1	0	2	1	0	5	5	128.398	100.59	27.808									24	1	23.7387	29
1	31	1	22.4675	2	1	0	2	1	0	5	6	131.109	99.415	31.694									32	1	27.7344	30
1	31	1	22.4675	2	1	0	3	0	1	6	1	130.098	102.161	27.937
1	31	1	22.4675	2	1	0	3	0	1	6	2	133.871	101.235	32.636
1	31	1	22.4675	2	1	0	3	0	1	6	3	131.544	99.801	31.743
1	31	1	22.4675	2	1	0	3	0	1	6	4	131.795	99.765	32.03
1	31	1	22.4675	2	1	0	3	0	1	6	5	133.158	103.028	30.13
1	31	1	22.4675	2	1	0	3	0	1	6	6	133.667	99.755	33.912
1	31	1	22.4675	3	0	1	1	0	0	7	1	136.244	98.789	37.455
1	31	1	22.4675	3	0	1	1	0	0	7	2	135.46	100.369	35.091
1	31	1	22.4675	3	0	1	1	0	0	7	3	138.078	101.902	36.176
1	31	1	22.4675	3	0	1	1	0	0	7	4	134.798	101.754	33.044
1	31	1	22.4675	3	0	1	1	0	0	7	5	135.942	99.764	36.178
1	31	1	22.4675	3	0	1	1	0	0	7	6	134.292	101.363	32.929
1	31	1	22.4675	3	0	1	2	1	0	8	1	132.208	106.644	25.564
1	31	1	22.4675	3	0	1	2	1	0	8	2	130.344	108.58	21.764
1	31	1	22.4675	3	0	1	2	1	0	8	3	132.875	108.778	24.097
1	31	1	22.4675	3	0	1	2	1	0	8	4	134.189	105.662	28.527
1	31	1	22.4675	3	0	1	2	1	0	8	5	126.037	108.464	17.573
1	31	1	22.4675	3	0	1	2	1	0	8	6	134.29	108.98	25.31
1	31	1	22.4675	3	0	1	3	0	1	9	1	126.971	99.488	27.483
1	31	1	22.4675	3	0	1	3	0	1	9	2	128.453	98.467	29.986
1	31	1	22.4675	3	0	1	3	0	1	9	3	129.095	98.078	31.017
1	31	1	22.4675	3	0	1	3	0	1	9	4	129.219	99.552	29.667
1	31	1	22.4675	3	0	1	3	0	1	9	5	129.552	98.994	30.558
1	31	1	22.4675	3	0	1	3	0	1	9	6	131.053	98.797	32.256
2	39	1	32.3437	1	0	0	1	0	0	1	1	152.482	105.611	46.871
2	39	1	32.3437	1	0	0	1	0	0	1	2	152.18	107.775	44.405
2	39	1	32.3437	1	0	0	1	0	0	1	3	153.079	107.923	45.156
2	39	1	32.3437	1	0	0	1	0	0	1	4	155.279	107.073	48.206
2	39	1	32.3437	1	0	0	1	0	0	1	5	157.642	106.816	50.826
2	39	1	32.3437	1	0	0	1	0	0	1	6	155.093	104.985	50.108
2	39	1	32.3437	1	0	0	2	1	0	2	1	137.379	102.354	35.025
2	39	1	32.3437	1	0	0	2	1	0	2	2	136.345	102.581	33.764
2	39	1	32.3437	1	0	0	2	1	0	2	3	137.082	101.972	35.11
2	39	1	32.3437	1	0	0	2	1	0	2	4	137.224	102.512	34.712
2	39	1	32.3437	1	0	0	2	1	0	2	5	136.378	103.1	33.278
2	39	1	32.3437	1	0	0	2	1	0	2	6	134.887	101.869	33.018
2	39	1	32.3437	1	0	0	3	0	1	3	1	145.048	107.404	37.644
2	39	1	32.3437	1	0	0	3	0	1	3	2	149.811	107.35	42.461
2	39	1	32.3437	1	0	0	3	0	1	3	3	152.238	108.128	44.11
2	39	1	32.3437	1	0	0	3	0	1	3	4	149.747	106.432	43.315
2	39	1	32.3437	1	0	0	3	0	1	3	5	149.129	108.497	40.632
2	39	1	32.3437	1	0	0	3	0	1	3	6	146.635	106.217	40.418
2	39	1	32.3437	2	1	0	1	0	0	4	1	150.654	106.282	44.372
2	39	1	32.3437	2	1	0	1	0	0	4	2	148.575	105.344	43.231
2	39	1	32.3437	2	1	0	1	0	0	4	3	148.479	107.238	41.241
2	39	1	32.3437	2	1	0	1	0	0	4	4	148.206	106.31	41.896
2	39	1	32.3437	2	1	0	1	0	0	4	5	145.741	105.321	40.42
2	39	1	32.3437	2	1	0	1	0	0	4	6	146.064	107.521	38.543
2	39	1	32.3437	2	1	0	2	1	0	5	1
2	39	1	32.3437	2	1	0	2	1	0	5	2
2	39	1	32.3437	2	1	0	2	1	0	5	3
2	39	1	32.3437	2	1	0	2	1	0	5	4
2	39	1	32.3437	2	1	0	2	1	0	5	5
2	39	1	32.3437	2	1	0	2	1	0	5	6
2	39	1	32.3437	2	1	0	3	0	1	6	1	148.091	104.998	43.093
2	39	1	32.3437	2	1	0	3	0	1	6	2	144.123	102.305	41.818
2	39	1	32.3437	2	1	0	3	0	1	6	3	141.136	103.845	37.291
2	39	1	32.3437	2	1	0	3	0	1	6	4	140.14	103.331	36.809
2	39	1	32.3437	2	1	0	3	0	1	6	5	139.47	102.804	36.666
2	39	1	32.3437	2	1	0	3	0	1	6	6	137.731	102.743	34.988
2	39	1	32.3437	3	0	1	1	0	0	7	1	142.863	104.788	38.075
2	39	1	32.3437	3	0	1	1	0	0	7	2	142.221	105.78	36.441
2	39	1	32.3437	3	0	1	1	0	0	7	3	143.151	105.864	37.287
2	39	1	32.3437	3	0	1	1	0	0	7	4	140.393	104.129	36.264
2	39	1	32.3437	3	0	1	1	0	0	7	5	137.375	104.486	32.889
2	39	1	32.3437	3	0	1	1	0	0	7	6	137.987	104.994	32.993
2	39	1	32.3437	3	0	1	2	1	0	8	1	125.514	103.473	22.041
2	39	1	32.3437	3	0	1	2	1	0	8	2	127.026	102.293	24.733
2	39	1	32.3437	3	0	1	2	1	0	8	3	127.98	102.733	25.247
2	39	1	32.3437	3	0	1	2	1	0	8	4	127.992	104.526	23.466
2	39	1	32.3437	3	0	1	2	1	0	8	5	130.403	100.906	29.497
2	39	1	32.3437	3	0	1	2	1	0	8	6	128.218	104.956	23.262
2	39	1	32.3437	3	0	1	3	0	1	9	1	139.618	111.271	28.347
2	39	1	32.3437	3	0	1	3	0	1	9	2	141.13	110.8	30.33
2	39	1	32.3437	3	0	1	3	0	1	9	3	138.725	112.049	26.676
2	39	1	32.3437	3	0	1	3	0	1	9	4	137.464	112.591	24.873
2	39	1	32.3437	3	0	1	3	0	1	9	5	135.528	113.301	22.227
2	39	1	32.3437	3	0	1	3	0	1	9	6	138.176	111.135	27.041
3	56	1	21.1927	1	0	0	1	0	0	1	1	116.966	99.657	17.309
3	56	1	21.1927	1	0	0	1	0	0	1	2	112.667	99.578	13.089
3	56	1	21.1927	1	0	0	1	0	0	1	3	115.401	99.712	15.689
3	56	1	21.1927	1	0	0	1	0	0	1	4	119.01	100.028	18.982
3	56	1	21.1927	1	0	0	1	0	0	1	5	114.599	100.26	14.339
3	56	1	21.1927	1	0	0	1	0	0	1	6	117.639	99.978	17.661
3	56	1	21.1927	1	0	0	2	1	0	2	1	118.467	103.09	15.377
3	56	1	21.1927	1	0	0	2	1	0	2	2	118.024	100.895	17.129
3	56	1	21.1927	1	0	0	2	1	0	2	3	116.8	100.609	16.191
3	56	1	21.1927	1	0	0	2	1	0	2	4	116.909	100.553	16.356
3	56	1	21.1927	1	0	0	2	1	0	2	5	117.105	101.587	15.518
3	56	1	21.1927	1	0	0	2	1	0	2	6	118.038	101.578	16.46
3	56	1	21.1927	1	0	0	3	0	1	3	1	128.663	104.8	23.863
3	56	1	21.1927	1	0	0	3	0	1	3	2	126.009	103.925	22.084
3	56	1	21.1927	1	0	0	3	0	1	3	3	127.121	105.743	21.378
3	56	1	21.1927	1	0	0	3	0	1	3	4	126.333	106.525	19.808
3	56	1	21.1927	1	0	0	3	0	1	3	5	127.842	104.461	23.381
3	56	1	21.1927	1	0	0	3	0	1	3	6	126.66	105.241	21.419
3	56	1	21.1927	2	1	0	1	0	0	4	1	125.329	106.861	18.468
3	56	1	21.1927	2	1	0	1	0	0	4	2	130.106	107.508	22.598
3	56	1	21.1927	2	1	0	1	0	0	4	3	125.694	105.699	19.995
3	56	1	21.1927	2	1	0	1	0	0	4	4	123.416	106.14	17.276
3	56	1	21.1927	2	1	0	1	0	0	4	5	122.073	108.582	13.491
3	56	1	21.1927	2	1	0	1	0	0	4	6	125.07	107.847	17.223
3	56	1	21.1927	2	1	0	2	1	0	5	1	129.581	114.342	15.239
3	56	1	21.1927	2	1	0	2	1	0	5	2	132.294	113.11	19.184
3	56	1	21.1927	2	1	0	2	1	0	5	3	132.6	112.125	20.475
3	56	1	21.1927	2	1	0	2	1	0	5	4	134.78	112.404	22.376
3	56	1	21.1927	2	1	0	2	1	0	5	5	131.736	112.298	19.438
3	56	1	21.1927	2	1	0	2	1	0	5	6	130.096	112.642	17.454
3	56	1	21.1927	2	1	0	3	0	1	6	1	133.842	107.161	26.681
3	56	1	21.1927	2	1	0	3	0	1	6	2	130.636	109.05	21.586
3	56	1	21.1927	2	1	0	3	0	1	6	3	131	106.907	24.093
3	56	1	21.1927	2	1	0	3	0	1	6	4	130.539	107.453	23.086
3	56	1	21.1927	2	1	0	3	0	1	6	5	131.845	109.098	22.747
3	56	1	21.1927	2	1	0	3	0	1	6	6	131.321	109.081	22.24
3	56	1	21.1927	3	0	1	1	0	0	7	1	125.408	113.791	11.617
3	56	1	21.1927	3	0	1	1	0	0	7	2	129.178	113.769	15.409
3	56	1	21.1927	3	0	1	1	0	0	7	3	125.981	113.168	12.813
3	56	1	21.1927	3	0	1	1	0	0	7	4	126.048	110.562	15.486
3	56	1	21.1927	3	0	1	1	0	0	7	5	125.704	113.899	11.805
3	56	1	21.1927	3	0	1	1	0	0	7	6	127.351	117.087	10.264
3	56	1	21.1927	3	0	1	2	1	0	8	1	129.222	110.853	18.369
3	56	1	21.1927	3	0	1	2	1	0	8	2	125.275	111.156	14.119
3	56	1	21.1927	3	0	1	2	1	0	8	3	126.071	111.935	14.136
3	56	1	21.1927	3	0	1	2	1	0	8	4	128.858	111.785	17.073
3	56	1	21.1927	3	0	1	2	1	0	8	5	125.3	110.615	14.685
3	56	1	21.1927	3	0	1	2	1	0	8	6	126.363	109.534	16.829
3	56	1	21.1927	3	0	1	3	0	1	9	1	132.087	111.4	20.687
3	56	1	21.1927	3	0	1	3	0	1	9	2	133.893	115.177	18.716
3	56	1	21.1927	3	0	1	3	0	1	9	3	132.459	111.376	21.083
3	56	1	21.1927	3	0	1	3	0	1	9	4	133.188	114.518	18.67
3	56	1	21.1927	3	0	1	3	0	1	9	5	132.846	113.994	18.852
3	56	1	21.1927	3	0	1	3	0	1	9	6	135.452	113.165	22.287
4	20	1	18.4049	1	0	0	1	0	0	1	1	138.595	107.674	30.921
4	20	1	18.4049	1	0	0	1	0	0	1	2	137.291	107.05	30.241
4	20	1	18.4049	1	0	0	1	0	0	1	3	136.466	107.722	28.744
4	20	1	18.4049	1	0	0	1	0	0	1	4	138.586	104.949	33.637
4	20	1	18.4049	1	0	0	1	0	0	1	5	140.103	105.642	34.461
4	20	1	18.4049	1	0	0	1	0	0	1	6	140.036	106.231	33.805
4	20	1	18.4049	1	0	0	2	1	0	2	1	125.061	100.928	24.133
4	20	1	18.4049	1	0	0	2	1	0	2	2	124.206	100.084	24.122
4	20	1	18.4049	1	0	0	2	1	0	2	3	124.658	100.46	24.198
4	20	1	18.4049	1	0	0	2	1	0	2	4	123.939	99.094	24.845
4	20	1	18.4049	1	0	0	2	1	0	2	5	124.767	99.439	25.328
4	20	1	18.4049	1	0	0	2	1	0	2	6	123.955	98.768	25.187
4	20	1	18.4049	1	0	0	3	0	1	3	1	139.589	102.361	37.228
4	20	1	18.4049	1	0	0	3	0	1	3	2	139.195	104.74	34.455
4	20	1	18.4049	1	0	0	3	0	1	3	3	141.132	104.51	36.622
4	20	1	18.4049	1	0	0	3	0	1	3	4	138.981	103.774	35.207
4	20	1	18.4049	1	0	0	3	0	1	3	5	137.845	102.074	35.771
4	20	1	18.4049	1	0	0	3	0	1	3	6	139.158	103.7	35.458
4	20	1	18.4049	2	1	0	1	0	0	4	1	140.464	107.848	32.616
4	20	1	18.4049	2	1	0	1	0	0	4	2	140.848	107.545	33.303
4	20	1	18.4049	2	1	0	1	0	0	4	3	143.483	108.635	34.848
4	20	1	18.4049	2	1	0	1	0	0	4	4	144.474	108.097	36.377
4	20	1	18.4049	2	1	0	1	0	0	4	5	143.396	109.398	33.998
4	20	1	18.4049	2	1	0	1	0	0	4	6	141.382	109.168	32.214
4	20	1	18.4049	2	1	0	2	1	0	5	1	135.422	105.457	29.965
4	20	1	18.4049	2	1	0	2	1	0	5	2	135.726	105.873	29.853
4	20	1	18.4049	2	1	0	2	1	0	5	3	138.644	105.564	33.08
4	20	1	18.4049	2	1	0	2	1	0	5	4	137.997	107.174	30.823
4	20	1	18.4049	2	1	0	2	1	0	5	5	137.504	105.571	31.933
4	20	1	18.4049	2	1	0	2	1	0	5	6	134.749	105.932	28.817
4	20	1	18.4049	2	1	0	3	0	1	6	1	138.404	110.496	27.908
4	20	1	18.4049	2	1	0	3	0	1	6	2	139.815	109.533	30.282
4	20	1	18.4049	2	1	0	3	0	1	6	3	141.276	109.407	31.869
4	20	1	18.4049	2	1	0	3	0	1	6	4	141.634	110.086	31.548
4	20	1	18.4049	2	1	0	3	0	1	6	5	140.414	109.846	30.568
4	20	1	18.4049	2	1	0	3	0	1	6	6	139.969	108.049	31.92
4	20	1	18.4049	3	0	1	1	0	0	7	1	136.273	104.683	31.59
4	20	1	18.4049	3	0	1	1	0	0	7	2	134.178	105.136	29.042
4	20	1	18.4049	3	0	1	1	0	0	7	3	135.815	105.293	30.522
4	20	1	18.4049	3	0	1	1	0	0	7	4	134.4	105.144	29.256
4	20	1	18.4049	3	0	1	1	0	0	7	5	136.105	104.802	31.303
4	20	1	18.4049	3	0	1	1	0	0	7	6	135.04	104.499	30.541
4	20	1	18.4049	3	0	1	2	1	0	8	1	123.045	97.78	25.265
4	20	1	18.4049	3	0	1	2	1	0	8	2	122.332	100.22	22.112
4	20	1	18.4049	3	0	1	2	1	0	8	3	123.891	98.924	24.967
4	20	1	18.4049	3	0	1	2	1	0	8	4	125.814	97.71	28.104
4	20	1	18.4049	3	0	1	2	1	0	8	5	123.789	97.833	25.956
4	20	1	18.4049	3	0	1	2	1	0	8	6	123.536	99.025	24.511
4	20	1	18.4049	3	0	1	3	0	1	9	1	131.283	98.657	32.626
4	20	1	18.4049	3	0	1	3	0	1	9	2	139.218	102.103	37.115
4	20	1	18.4049	3	0	1	3	0	1	9	3	129.036	103.436	25.6
4	20	1	18.4049	3	0	1	3	0	1	9	4	131.631	102.44	29.191
4	20	1	18.4049	3	0	1	3	0	1	9	5	130.538	102.312	28.226
4	20	1	18.4049	3	0	1	3	0	1	9	6	131.399	100.724	30.675
5	37	0	26.7712	1	0	0	1	0	0	1	1	135.937	112.87	23.067
5	37	0	26.7712	1	0	0	1	0	0	1	2	136.071	110.242	25.829
5	37	0	26.7712	1	0	0	1	0	0	1	3	137.726	109.741	27.985
5	37	0	26.7712	1	0	0	1	0	0	1	4	136.172	109.688	26.484
5	37	0	26.7712	1	0	0	1	0	0	1	5	130.593	110.313	20.28
5	37	0	26.7712	1	0	0	1	0	0	1	6	133.845	109.537	24.308
5	37	0	26.7712	1	0	0	2	1	0	2	1	126.058	106.372	19.686
5	37	0	26.7712	1	0	0	2	1	0	2	2	125.543	104.315	21.228
5	37	0	26.7712	1	0	0	2	1	0	2	3	125.679	105.631	20.048
5	37	0	26.7712	1	0	0	2	1	0	2	4	128.448	107.131	21.317
5	37	0	26.7712	1	0	0	2	1	0	2	5	129.668	107.1	22.568
5	37	0	26.7712	1	0	0	2	1	0	2	6	124.114	107.15	16.964
5	37	0	26.7712	1	0	0	3	0	1	3	1	128.773	105.007	23.766
5	37	0	26.7712	1	0	0	3	0	1	3	2	122.085	111.201	10.884
5	37	0	26.7712	1	0	0	3	0	1	3	3	128.725	103.944	24.781
5	37	0	26.7712	1	0	0	3	0	1	3	4	128.227	107.25	20.977
5	37	0	26.7712	1	0	0	3	0	1	3	5	129.704	106.616	23.088
5	37	0	26.7712	1	0	0	3	0	1	3	6	127.263	105.481	21.782
5	37	0	26.7712	2	1	0	1	0	0	4	1	134.428	105.814	28.614
5	37	0	26.7712	2	1	0	1	0	0	4	2	134.19	106.994	27.196
5	37	0	26.7712	2	1	0	1	0	0	4	3	134.576	103.725	30.851
5	37	0	26.7712	2	1	0	1	0	0	4	4	132.013	105.136	26.877
5	37	0	26.7712	2	1	0	1	0	0	4	5	133.92	103.63	30.29
5	37	0	26.7712	2	1	0	1	0	0	4	6	133.661	105.151	28.51
5	37	0	26.7712	2	1	0	2	1	0	5	1	134.348	108.773	25.575
5	37	0	26.7712	2	1	0	2	1	0	5	2	132.974	108.035	24.939
5	37	0	26.7712	2	1	0	2	1	0	5	3	133.11	107.631	25.479
5	37	0	26.7712	2	1	0	2	1	0	5	4	133.526	108.107	25.419
5	37	0	26.7712	2	1	0	2	1	0	5	5	133.093	109.141	23.952
5	37	0	26.7712	2	1	0	2	1	0	5	6	131.116
5	37	0	26.7712	2	1	0	3	0	1	6	1	133.619	108.326	25.293
5	37	0	26.7712	2	1	0	3	0	1	6	2	133.521	108.17	25.351
5	37	0	26.7712	2	1	0	3	0	1	6	3	131.641	108.577	23.064
5	37	0	26.7712	2	1	0	3	0	1	6	4	134.241	107.912	26.329
5	37	0	26.7712	2	1	0	3	0	1	6	5	134.925	107.452	27.473
5	37	0	26.7712	2	1	0	3	0	1	6	6	132.352	108.032	24.32
5	37	0	26.7712	3	0	1	1	0	0	7	1	131.533	107.751	23.782
5	37	0	26.7712	3	0	1	1	0	0	7	2	132.431	105.178	27.253
5	37	0	26.7712	3	0	1	1	0	0	7	3	130.034	108.441	21.593
5	37	0	26.7712	3	0	1	1	0	0	7	4	132.251	109.251	23
5	37	0	26.7712	3	0	1	1	0	0	7	5	131.866	108.02	23.846
5	37	0	26.7712	3	0	1	1	0	0	7	6	131.871	107.135	24.736
5	37	0	26.7712	3	0	1	2	1	0	8	1	127.483	105.818	21.665
5	37	0	26.7712	3	0	1	2	1	0	8	2	127.214	106.466	20.748
5	37	0	26.7712	3	0	1	2	1	0	8	3	126.024	104.451	21.573
5	37	0	26.7712	3	0	1	2	1	0	8	4	125.918	105.139	20.779
5	37	0	26.7712	3	0	1	2	1	0	8	5	126.013	104.104	21.909
5	37	0	26.7712	3	0	1	2	1	0	8	6	126.076	104.169	21.907
5	37	0	26.7712	3	0	1	3	0	1	9	1	127.398	106.062	21.336
5	37	0	26.7712	3	0	1	3	0	1	9	2	127.207	107.651	19.556
5	37	0	26.7712	3	0	1	3	0	1	9	3	109.597	104.761	4.836
5	37	0	26.7712	3	0	1	3	0	1	9	4	127.804	106.326	21.478
5	37	0	26.7712	3	0	1	3	0	1	9	5	129.225	105.539	23.686
5	37	0	26.7712	3	0	1	3	0	1	9	6	124.57	109.663	14.907
6	44	1	32.7694	1	0	0	1	0	0	1	1	135.577	108.912	26.665
6	44	1	32.7694	1	0	0	1	0	0	1	2	138.009	107.27	30.739
6	44	1	32.7694	1	0	0	1	0	0	1	3	137.86	108.948	28.912
6	44	1	32.7694	1	0	0	1	0	0	1	4	137.364	108.1	29.264
6	44	1	32.7694	1	0	0	1	0	0	1	5	135.526	106.698	28.828
6	44	1	32.7694	1	0	0	1	0	0	1	6	134.767	106.956	27.811
6	44	1	32.7694	1	0	0	2	1	0	2	1	126.767	102.313	24.454
6	44	1	32.7694	1	0	0	2	1	0	2	2	126.703	101.717	24.986
6	44	1	32.7694	1	0	0	2	1	0	2	3	128.412	102.803	25.609
6	44	1	32.7694	1	0	0	2	1	0	2	4	128.977	103.953	25.024
6	44	1	32.7694	1	0	0	2	1	0	2	5	126.223	103.108	23.115
6	44	1	32.7694	1	0	0	2	1	0	2	6	127.292	103.951	23.341
6	44	1	32.7694	1	0	0	3	0	1	3	1	138.472	113.663	24.809
6	44	1	32.7694	1	0	0	3	0	1	3	2	142.86	111.414	31.446
6	44	1	32.7694	1	0	0	3	0	1	3	3	139.918	111.747	28.171
6	44	1	32.7694	1	0	0	3	0	1	3	4	140.255	111.13	29.125
6	44	1	32.7694	1	0	0	3	0	1	3	5	138.708	112.463	26.245
6	44	1	32.7694	1	0	0	3	0	1	3	6	141.085	111.342	29.743
6	44	1	32.7694	2	1	0	1	0	0	4	1	142.767	116.711	26.056
6	44	1	32.7694	2	1	0	1	0	0	4	2	144.364	114.84	29.524
6	44	1	32.7694	2	1	0	1	0	0	4	3	143.281	114.788	28.493
6	44	1	32.7694	2	1	0	1	0	0	4	4	140.59	114.647	25.943
6	44	1	32.7694	2	1	0	1	0	0	4	5	136.655	113.263	23.392
6	44	1	32.7694	2	1	0	1	0	0	4	6	142.309	117.931	24.378
6	44	1	32.7694	2	1	0	2	1	0	5	1
6	44	1	32.7694	2	1	0	2	1	0	5	2
6	44	1	32.7694	2	1	0	2	1	0	5	3
6	44	1	32.7694	2	1	0	2	1	0	5	4
6	44	1	32.7694	2	1	0	2	1	0	5	5
6	44	1	32.7694	2	1	0	2	1	0	5	6
6	44	1	32.7694	2	1	0	3	0	1	6	1	130.48	99.502	30.978
6	44	1	32.7694	2	1	0	3	0	1	6	2	127.931	99.935	27.996
6	44	1	32.7694	2	1	0	3	0	1	6	3	129.103	100.861	28.242
6	44	1	32.7694	2	1	0	3	0	1	6	4	129.849	100.1	29.749
6	44	1	32.7694	2	1	0	3	0	1	6	5	131.042	99.835	31.207
6	44	1	32.7694	2	1	0	3	0	1	6	6	128.564	99.477	29.087
6	44	1	32.7694	3	0	1	1	0	0	7	1	141.034	116.285	24.749
6	44	1	32.7694	3	0	1	1	0	0	7	2	137.934	116.128	21.806
6	44	1	32.7694	3	0	1	1	0	0	7	3	138.318	116.73	21.588
6	44	1	32.7694	3	0	1	1	0	0	7	4	140.65	115.806	24.844
6	44	1	32.7694	3	0	1	1	0	0	7	5	140.905	116.187	24.718
6	44	1	32.7694	3	0	1	1	0	0	7	6	140.326	115.287	25.039
6	44	1	32.7694	3	0	1	2	1	0	8	1	133.375	109.028	24.347
6	44	1	32.7694	3	0	1	2	1	0	8	2	132.5	111.312	21.188
6	44	1	32.7694	3	0	1	2	1	0	8	3	132.497	110.097	22.4
6	44	1	32.7694	3	0	1	2	1	0	8	4	132.536	109.983	22.553
6	44	1	32.7694	3	0	1	2	1	0	8	5	130.443	114.437	16.006
6	44	1	32.7694	3	0	1	2	1	0	8	6	133.647	109.143	24.504
6	44	1	32.7694	3	0	1	3	0	1	9	1	137.852	109.623	28.229
6	44	1	32.7694	3	0	1	3	0	1	9	2	139.182	109.472	29.71
6	44	1	32.7694	3	0	1	3	0	1	9	3	139.231	110.201	29.03
6	44	1	32.7694	3	0	1	3	0	1	9	4	141.252	107.669	33.583
6	44	1	32.7694	3	0	1	3	0	1	9	5	140.464	110.781	29.683
6	44	1	32.7694	3	0	1	3	0	1	9	6	138.42	109.102	29.318
7	26	0	24.179	1	0	0	1	0	0	1	1	135.111	110.246	24.865
7	26	0	24.179	1	0	0	1	0	0	1	2	130.4	109.55	20.85
7	26	0	24.179	1	0	0	1	0	0	1	3	132.32	107.66	24.66
7	26	0	24.179	1	0	0	1	0	0	1	4	130	108.141	21.859
7	26	0	24.179	1	0	0	1	0	0	1	5	129.41	107.629	21.781
7	26	0	24.179	1	0	0	1	0	0	1	6	128.66	105.393	23.267
7	26	0	24.179	1	0	0	2	1	0	2	1	130.786	112.082	18.704
7	26	0	24.179	1	0	0	2	1	0	2	2	128.391	111.527	16.864
7	26	0	24.179	1	0	0	2	1	0	2	3	126.592	112.615	13.977
7	26	0	24.179	1	0	0	2	1	0	2	4	128.878	109.231	19.647
7	26	0	24.179	1	0	0	2	1	0	2	5	126.85	110.132	16.718
7	26	0	24.179	1	0	0	2	1	0	2	6	126.593	108.268	18.325
7	26	0	24.179	1	0	0	3	0	1	3	1	145.569	123.106	22.463
7	26	0	24.179	1	0	0	3	0	1	3	2	141.683	126.276	15.407
7	26	0	24.179	1	0	0	3	0	1	3	3	143.49	124.871	18.619
7	26	0	24.179	1	0	0	3	0	1	3	4	144.445	125.613	18.832
7	26	0	24.179	1	0	0	3	0	1	3	5	145.231	121.918	23.313
7	26	0	24.179	1	0	0	3	0	1	3	6	146.175	120.113	26.062
7	26	0	24.179	2	1	0	1	0	0	4	1	135.77	106.839	28.931
7	26	0	24.179	2	1	0	1	0	0	4	2	131.765	111.164	20.601
7	26	0	24.179	2	1	0	1	0	0	4	3	137.909	107.664	30.245
7	26	0	24.179	2	1	0	1	0	0	4	4	135.674	108.436	27.238
7	26	0	24.179	2	1	0	1	0	0	4	5	134.352	107.962	26.39
7	26	0	24.179	2	1	0	1	0	0	4	6	134.819	108.044	26.775
7	26	0	24.179	2	1	0	2	1	0	5	1	130.69	107.686	23.004
7	26	0	24.179	2	1	0	2	1	0	5	2	130.043	105.007	25.036
7	26	0	24.179	2	1	0	2	1	0	5	3	133.353	105.142	28.211
7	26	0	24.179	2	1	0	2	1	0	5	4	131.261	106.906	24.355
7	26	0	24.179	2	1	0	2	1	0	5	5	131.129	106.886	24.243
7	26	0	24.179	2	1	0	2	1	0	5	6	134.748	105.387	29.361
7	26	0	24.179	2	1	0	3	0	1	6	1	140.311	114.925	25.386
7	26	0	24.179	2	1	0	3	0	1	6	2	141.593	112.748	28.845
7	26	0	24.179	2	1	0	3	0	1	6	3	140.376	133.279	7.097
7	26	0	24.179	2	1	0	3	0	1	6	4	139.002	113.196	25.806
7	26	0	24.179	2	1	0	3	0	1	6	5	140.205	112.66	27.545
7	26	0	24.179	2	1	0	3	0	1	6	6	137.68	112.697	24.983
7	26	0	24.179	3	0	1	1	0	0	7	1	132.786	101.568	31.218
7	26	0	24.179	3	0	1	1	0	0	7	2	127.877	102.442	25.435
7	26	0	24.179	3	0	1	1	0	0	7	3	125.11	102.063	23.047
7	26	0	24.179	3	0	1	1	0	0	7	4	126.679	101.776	24.903
7	26	0	24.179	3	0	1	1	0	0	7	5	126.794	103.085	23.709
7	26	0	24.179	3	0	1	1	0	0	7	6	127.579	102.609	24.97
7	26	0	24.179	3	0	1	2	1	0	8	1	133.662	112.779	20.883
7	26	0	24.179	3	0	1	2	1	0	8	2	132.348	112.94	19.408
7	26	0	24.179	3	0	1	2	1	0	8	3	131.962	114.555	17.407
7	26	0	24.179	3	0	1	2	1	0	8	4	134.442	112.527	21.915
7	26	0	24.179	3	0	1	2	1	0	8	5	131.822	113.623	18.199
7	26	0	24.179	3	0	1	2	1	0	8	6	135.529	113.2	22.329
7	26	0	24.179	3	0	1	3	0	1	9	1	133.223	111.474	21.749
7	26	0	24.179	3	0	1	3	0	1	9	2	136.423	110.072	26.351
7	26	0	24.179	3	0	1	3	0	1	9	3	136.713	110.501	26.212
7	26	0	24.179	3	0	1	3	0	1	9	4	131.557	108.118	23.439
7	26	0	24.179	3	0	1	3	0	1	9	5	132.102	109.33	22.772
7	26	0	24.179	3	0	1	3	0	1	9	6	132.166	109.934	22.232
8	47	1	38.0142	1	0	0	1	0	0	1	1	122.233	98.593	23.64
8	47	1	38.0142	1	0	0	1	0	0	1	2	121.114	99.23	21.884
8	47	1	38.0142	1	0	0	1	0	0	1	3	125.711	98.293	27.418
8	47	1	38.0142	1	0	0	1	0	0	1	4	122.26	101.007	21.253
8	47	1	38.0142	1	0	0	1	0	0	1	5	125.558	100.217	25.341
8	47	1	38.0142	1	0	0	1	0	0	1	6	123.6	98.675	24.925
8	47	1	38.0142	1	0	0	2	1	0	2	1	119.714	97.9	21.814
8	47	1	38.0142	1	0	0	2	1	0	2	2	124.767	96.432	28.335
8	47	1	38.0142	1	0	0	2	1	0	2	3	122.166	96.061	26.105
8	47	1	38.0142	1	0	0	2	1	0	2	4	122.53	94.38	28.15
8	47	1	38.0142	1	0	0	2	1	0	2	5	121.258	96.181	25.077
8	47	1	38.0142	1	0	0	2	1	0	2	6	121.388	95.489	25.899
8	47	1	38.0142	1	0	0	3	0	1	3	1	124.05	96.435	27.615
8	47	1	38.0142	1	0	0	3	0	1	3	2	125.653	92.804	32.849
8	47	1	38.0142	1	0	0	3	0	1	3	3	124.385	94.275	30.11
8	47	1	38.0142	1	0	0	3	0	1	3	4	123.362	93.293	30.069
8	47	1	38.0142	1	0	0	3	0	1	3	5	123.845	92.625	31.22
8	47	1	38.0142	1	0	0	3	0	1	3	6	126.124	92.474	33.65
8	47	1	38.0142	2	1	0	1	0	0	4	1	140.573	103.309	37.264
8	47	1	38.0142	2	1	0	1	0	0	4	2	143.059	102.097	40.962
8	47	1	38.0142	2	1	0	1	0	0	4	3	139.485	101.697	37.788
8	47	1	38.0142	2	1	0	1	0	0	4	4	140.26	102.328	37.932
8	47	1	38.0142	2	1	0	1	0	0	4	5	143.029	102.457	40.572
8	47	1	38.0142	2	1	0	1	0	0	4	6	141.425	103.443	37.982
8	47	1	38.0142	2	1	0	2	1	0	5	1
8	47	1	38.0142	2	1	0	2	1	0	5	2
8	47	1	38.0142	2	1	0	2	1	0	5	3
8	47	1	38.0142	2	1	0	2	1	0	5	4
8	47	1	38.0142	2	1	0	2	1	0	5	5
8	47	1	38.0142	2	1	0	2	1	0	5	6
8	47	1	38.0142	2	1	0	3	0	1	6	1	128.832	99.788	29.044
8	47	1	38.0142	2	1	0	3	0	1	6	2	133.852	99.282	34.57
8	47	1	38.0142	2	1	0	3	0	1	6	3	130.118	98.307	31.811
8	47	1	38.0142	2	1	0	3	0	1	6	4	128.453	99.015	29.438
8	47	1	38.0142	2	1	0	3	0	1	6	5	132.261	98.959	33.302
8	47	1	38.0142	2	1	0	3	0	1	6	6	133.015	98.83	34.185
8	47	1	38.0142	3	0	1	1	0	0	7	1	126.738	99.722	27.016
8	47	1	38.0142	3	0	1	1	0	0	7	2	124.144	99.98	24.164
8	47	1	38.0142	3	0	1	1	0	0	7	3	126.098	101.687	24.411
8	47	1	38.0142	3	0	1	1	0	0	7	4	129.622	99.389	30.233
8	47	1	38.0142	3	0	1	1	0	0	7	5	128.604	100.357	28.247
8	47	1	38.0142	3	0	1	1	0	0	7	6	128.287	102.75	25.537
8	47	1	38.0142	3	0	1	2	1	0	8	1	126.07	101.975	24.095
8	47	1	38.0142	3	0	1	2	1	0	8	2	127.913	101.189	26.724
8	47	1	38.0142	3	0	1	2	1	0	8	3	127.573	101.513	26.06
8	47	1	38.0142	3	0	1	2	1	0	8	4	128.009	100.785	27.224
8	47	1	38.0142	3	0	1	2	1	0	8	5	127.547	101.926	25.621
8	47	1	38.0142	3	0	1	2	1	0	8	6	127.628	101.251	26.377
8	47	1	38.0142	3	0	1	3	0	1	9	1	118.482	87.593	30.889
8	47	1	38.0142	3	0	1	3	0	1	9	2	120.051	86.949	33.102
8	47	1	38.0142	3	0	1	3	0	1	9	3	120.435	85.886	34.549
8	47	1	38.0142	3	0	1	3	0	1	9	4	119.838	85.957	33.881
8	47	1	38.0142	3	0	1	3	0	1	9	5	119.635	86.491	33.144
8	47	1	38.0142	3	0	1	3	0	1	9	6	119.826	86.383	33.443
9	45	0	26.2202	1	0	0	1	0	0	1	1	125.081	97.665	27.416
9	45	0	26.2202	1	0	0	1	0	0	1	2	125.807	101.097	24.71
9	45	0	26.2202	1	0	0	1	0	0	1	3	124.36	100.959	23.401
9	45	0	26.2202	1	0	0	1	0	0	1	4	126.164	99.796	26.368
9	45	0	26.2202	1	0	0	1	0	0	1	5	118.656	99.399	19.257
9	45	0	26.2202	1	0	0	1	0	0	1	6	125.672	100.12	25.552
9	45	0	26.2202	1	0	0	2	1	0	2	1	126.24	105.083	21.157
9	45	0	26.2202	1	0	0	2	1	0	2	2	127.774	103.792	23.982
9	45	0	26.2202	1	0	0	2	1	0	2	3	125.404	103.813	21.591
9	45	0	26.2202	1	0	0	2	1	0	2	4	126.288	103.784	22.504
9	45	0	26.2202	1	0	0	2	1	0	2	5	125.613	104.436	21.177
9	45	0	26.2202	1	0	0	2	1	0	2	6	125.674	103.746	21.928
9	45	0	26.2202	1	0	0	3	0	1	3	1	141.157	113.876	27.281
9	45	0	26.2202	1	0	0	3	0	1	3	2	140.188	115.612	24.576
9	45	0	26.2202	1	0	0	3	0	1	3	3	142.171	114.566	27.605
9	45	0	26.2202	1	0	0	3	0	1	3	4	141.856	115.838	26.018
9	45	0	26.2202	1	0	0	3	0	1	3	5	140.148	115.555	24.593
9	45	0	26.2202	1	0	0	3	0	1	3	6	139.111	115.288	23.823
9	45	0	26.2202	2	1	0	1	0	0	4	1	130.242	99.526	30.716
9	45	0	26.2202	2	1	0	1	0	0	4	2	129.25	103.603	25.647
9	45	0	26.2202	2	1	0	1	0	0	4	3	131.408	100.809	30.599
9	45	0	26.2202	2	1	0	1	0	0	4	4	132.311	100.541	31.77
9	45	0	26.2202	2	1	0	1	0	0	4	5	130.522	99.657	30.865
9	45	0	26.2202	2	1	0	1	0	0	4	6	130.818	99.486	31.332
9	45	0	26.2202	2	1	0	2	1	0	5	1
9	45	0	26.2202	2	1	0	2	1	0	5	2
9	45	0	26.2202	2	1	0	2	1	0	5	3
9	45	0	26.2202	2	1	0	2	1	0	5	4
9	45	0	26.2202	2	1	0	2	1	0	5	5
9	45	0	26.2202	2	1	0	2	1	0	5	6
9	45	0	26.2202	2	1	0	3	0	1	6	1	130.411	99.395	31.016
9	45	0	26.2202	2	1	0	3	0	1	6	2	130.021	98.409	31.612
9	45	0	26.2202	2	1	0	3	0	1	6	3	130.096	98.486	31.61
9	45	0	26.2202	2	1	0	3	0	1	6	4	128.571	99.582	28.989
9	45	0	26.2202	2	1	0	3	0	1	6	5	132.575	98.599	33.976
9	45	0	26.2202	2	1	0	3	0	1	6	6	131.248	100.393	30.855
9	45	0	26.2202	3	0	1	1	0	0	7	1	125.621	103.44	22.181
9	45	0	26.2202	3	0	1	1	0	0	7	2	124.545	103.397	21.148
9	45	0	26.2202	3	0	1	1	0	0	7	3	121.52	102.516	19.004
9	45	0	26.2202	3	0	1	1	0	0	7	4	127.116	103.868	23.248
9	45	0	26.2202	3	0	1	1	0	0	7	5	126.248	100.912	25.336
9	45	0	26.2202	3	0	1	1	0	0	7	6	126.646	101.39	25.256
9	45	0	26.2202	3	0	1	2	1	0	8	1	132.129	107.805	24.324
9	45	0	26.2202	3	0	1	2	1	0	8	2	129.911	105.236	24.675
9	45	0	26.2202	3	0	1	2	1	0	8	3	128.921	106.451	22.47
9	45	0	26.2202	3	0	1	2	1	0	8	4	130.004	101.099	28.905
9	45	0	26.2202	3	0	1	2	1	0	8	5	125.605	104.541	21.064
9	45	0	26.2202	3	0	1	2	1	0	8	6	128.762	106.305	22.457
9	45	0	26.2202	3	0	1	3	0	1	9	1	129.725	92.16	37.565
9	45	0	26.2202	3	0	1	3	0	1	9	2	125.881	95.523	30.358
9	45	0	26.2202	3	0	1	3	0	1	9	3	127	94.309	32.691
9	45	0	26.2202	3	0	1	3	0	1	9	4	127.903	93.582	34.321
9	45	0	26.2202	3	0	1	3	0	1	9	5	127.985	94.139	33.846
9	45	0	26.2202	3	0	1	3	0	1	9	6	128.671	96.597	32.074
10	29	0	18.7242	1	0	0	1	0	0	1	1	119.45	101.371	18.079
10	29	0	18.7242	1	0	0	1	0	0	1	2	126.572	102.467	24.105
10	29	0	18.7242	1	0	0	1	0	0	1	3	117.573	102.069	15.504
10	29	0	18.7242	1	0	0	1	0	0	1	4	119.372	101.073	18.299
10	29	0	18.7242	1	0	0	1	0	0	1	5	126.346	101.493	24.853
10	29	0	18.7242	1	0	0	1	0	0	1	6	121.397	102.251	19.146
10	29	0	18.7242	1	0	0	2	1	0	2	1	133.435	105.724	27.711
10	29	0	18.7242	1	0	0	2	1	0	2	2	127.563	103.178	24.385
10	29	0	18.7242	1	0	0	2	1	0	2	3	120.905	105.992	14.913
10	29	0	18.7242	1	0	0	2	1	0	2	4	121.89	107.399	14.491
10	29	0	18.7242	1	0	0	2	1	0	2	5	125.496	108.55	16.946
10	29	0	18.7242	1	0	0	2	1	0	2	6	126.259	105.55	20.709
10	29	0	18.7242	1	0	0	3	0	1	3	1	114.477	103.181	11.296
10	29	0	18.7242	1	0	0	3	0	1	3	2	117.123	103.025	14.098
10	29	0	18.7242	1	0	0	3	0	1	3	3	118.284	103.095	15.189
10	29	0	18.7242	1	0	0	3	0	1	3	4	118.627	102.332	16.295
10	29	0	18.7242	1	0	0	3	0	1	3	5	111.879	103.872	8.007
10	29	0	18.7242	1	0	0	3	0	1	3	6	114.066	102.466	11.6
10	29	0	18.7242	2	1	0	1	0	0	4	1	129.503	109.451	20.052
10	29	0	18.7242	2	1	0	1	0	0	4	2	127.142	108.614	18.528
10	29	0	18.7242	2	1	0	1	0	0	4	3	129.272	107.529	21.743
10	29	0	18.7242	2	1	0	1	0	0	4	4	125.887	108.126	17.761
10	29	0	18.7242	2	1	0	1	0	0	4	5	125	127.702	2.702
10	29	0	18.7242	2	1	0	1	0	0	4	6	128.749	109.72	19.029
10	29	0	18.7242	2	1	0	2	1	0	5	1
10	29	0	18.7242	2	1	0	2	1	0	5	2
10	29	0	18.7242	2	1	0	2	1	0	5	3
10	29	0	18.7242	2	1	0	2	1	0	5	4
10	29	0	18.7242	2	1	0	2	1	0	5	5
10	29	0	18.7242	2	1	0	2	1	0	5	6
10	29	0	18.7242	2	1	0	3	0	1	6	1	124.463	103.554	20.909
10	29	0	18.7242	2	1	0	3	0	1	6	2	126.398	100.941	25.457
10	29	0	18.7242	2	1	0	3	0	1	6	3	128.054	101.871	26.183
10	29	0	18.7242	2	1	0	3	0	1	6	4	123.63	103.759	19.871
10	29	0	18.7242	2	1	0	3	0	1	6	5	122.492	101.766	20.726
10	29	0	18.7242	2	1	0	3	0	1	6	6	118.58	102.981	15.599
10	29	0	18.7242	3	0	1	1	0	0	7	1	122.21	104.724	17.486
10	29	0	18.7242	3	0	1	1	0	0	7	2	119.89	105.698	14.192
10	29	0	18.7242	3	0	1	1	0	0	7	3	120.501	104.637	15.864
10	29	0	18.7242	3	0	1	1	0	0	7	4	123.622	103.059	20.563
10	29	0	18.7242	3	0	1	1	0	0	7	5	124.02	105.291	18.729
10	29	0	18.7242	3	0	1	1	0	0	7	6	125.609	105.478	20.131
10	29	0	18.7242	3	0	1	2	1	0	8	1	124.517	100.653	23.864
10	29	0	18.7242	3	0	1	2	1	0	8	2	122.813	100.82	21.993
10	29	0	18.7242	3	0	1	2	1	0	8	3	122.992	99.796	23.196
10	29	0	18.7242	3	0	1	2	1	0	8	4	120.703	100.62	20.083
10	29	0	18.7242	3	0	1	2	1	0	8	5	123.159	102.529	20.63
10	29	0	18.7242	3	0	1	2	1	0	8	6	119.148	104.378	14.77
10	29	0	18.7242	3	0	1	3	0	1	9	1	122.942	108.369	14.573
10	29	0	18.7242	3	0	1	3	0	1	9	2	123.207	108.108	15.099
10	29	0	18.7242	3	0	1	3	0	1	9	3	120.884	108.6	12.284
10	29	0	18.7242	3	0	1	3	0	1	9	4	126.198	107.949	18.249
10	29	0	18.7242	3	0	1	3	0	1	9	5	127.055	106.631	20.424
10	29	0	18.7242	3	0	1	3	0	1	9	6	129.496	108.399	21.097
11	29	0	25.0928	1	0	0	1	0	0	1	1	138.024	118.365	19.659
11	29	0	25.0928	1	0	0	1	0	0	1	2	137.615	117.33	20.285
11	29	0	25.0928	1	0	0	1	0	0	1	3	137.848	116.549	21.299
11	29	0	25.0928	1	0	0	1	0	0	1	4	136.042	116.487	19.555
11	29	0	25.0928	1	0	0	1	0	0	1	5	137.889	117.264	20.625
11	29	0	25.0928	1	0	0	1	0	0	1	6	138.432	116.389	22.043
11	29	0	25.0928	1	0	0	2	1	0	2	1	132.982	114.993	17.989
11	29	0	25.0928	1	0	0	2	1	0	2	2	135.114	114.875	20.239
11	29	0	25.0928	1	0	0	2	1	0	2	3	134.71	113.763	20.947
11	29	0	25.0928	1	0	0	2	1	0	2	4	134.943	114.152	20.791
11	29	0	25.0928	1	0	0	2	1	0	2	5	134.042	113.073	20.969
11	29	0	25.0928	1	0	0	2	1	0	2	6	134.355	114.932	19.423
11	29	0	25.0928	1	0	0	3	0	1	3	1	132.088	111.719	20.369
11	29	0	25.0928	1	0	0	3	0	1	3	2	133.052	114.327	18.725
11	29	0	25.0928	1	0	0	3	0	1	3	3	134.191	115.637	18.554
11	29	0	25.0928	1	0	0	3	0	1	3	4	129.786	114.158	15.628
11	29	0	25.0928	1	0	0	3	0	1	3	5	127.53	109.794	17.736
11	29	0	25.0928	1	0	0	3	0	1	3	6	133.308	114.962	18.346
11	29	0	25.0928	2	1	0	1	0	0	4	1	133.934	112.394	21.54
11	29	0	25.0928	2	1	0	1	0	0	4	2	134.251	110.79	23.461
11	29	0	25.0928	2	1	0	1	0	0	4	3	135.083	112.129	22.954
11	29	0	25.0928	2	1	0	1	0	0	4	4	134.037	112.565	21.472
11	29	0	25.0928	2	1	0	1	0	0	4	5	134.524	111.24	23.284
11	29	0	25.0928	2	1	0	1	0	0	4	6	134.257	110.78	23.477
11	29	0	25.0928	2	1	0	2	1	0	5	1	138.433	114.47	23.963
11	29	0	25.0928	2	1	0	2	1	0	5	2	139.328	113.406	25.922
11	29	0	25.0928	2	1	0	2	1	0	5	3	139.068	115.51	23.558
11	29	0	25.0928	2	1	0	2	1	0	5	4	139.588	114.581	25.007
11	29	0	25.0928	2	1	0	2	1	0	5	5	138.533	113.173	25.36
11	29	0	25.0928	2	1	0	2	1	0	5	6	138.031	114.207	23.824
11	29	0	25.0928	2	1	0	3	0	1	6	1	134.605	116.996	17.609
11	29	0	25.0928	2	1	0	3	0	1	6	2	136.298	116.802	19.496
11	29	0	25.0928	2	1	0	3	0	1	6	3	137.065	117.467	19.598
11	29	0	25.0928	2	1	0	3	0	1	6	4	140.422	117.23	23.192
11	29	0	25.0928	2	1	0	3	0	1	6	5	138.296	118.038	20.258
11	29	0	25.0928	2	1	0	3	0	1	6	6	137.766	117.108	20.658
11	29	0	25.0928	3	0	1	1	0	0	7	1	132.215	112.029	20.186
11	29	0	25.0928	3	0	1	1	0	0	7	2	132.425	112.25	20.175
11	29	0	25.0928	3	0	1	1	0	0	7	3	131.923	111.441	20.482
11	29	0	25.0928	3	0	1	1	0	0	7	4	131.324	110.843	20.481
11	29	0	25.0928	3	0	1	1	0	0	7	5	132.306	110.366	21.94
11	29	0	25.0928	3	0	1	1	0	0	7	6	130.914	113.294	17.62
11	29	0	25.0928	3	0	1	2	1	0	8	1	127.581	109.54	18.041
11	29	0	25.0928	3	0	1	2	1	0	8	2	130.741	112.26	18.481
11	29	0	25.0928	3	0	1	2	1	0	8	3	130.714	110.325	20.389
11	29	0	25.0928	3	0	1	2	1	0	8	4	131.975	111.557	20.418
11	29	0	25.0928	3	0	1	2	1	0	8	5	128.209	109.827	18.382
11	29	0	25.0928	3	0	1	2	1	0	8	6	131.449	108.856	22.593
11	29	0	25.0928	3	0	1	3	0	1	9	1	134.745	112.244	22.501
11	29	0	25.0928	3	0	1	3	0	1	9	2	135.119	111.599	23.52
11	29	0	25.0928	3	0	1	3	0	1	9	3	134.873	113.896	20.977
11	29	0	25.0928	3	0	1	3	0	1	9	4	136.997	112.327	24.67
11	29	0	25.0928	3	0	1	3	0	1	9	5	134.923	112.434	22.489
11	29	0	25.0928	3	0	1	3	0	1	9	6	134.263	113.196	21.067
12	38	1	20.8429	1	0	0	1	0	0	1	1	134.244	101.369	32.875
12	38	1	20.8429	1	0	0	1	0	0	1	2	135.371	104.77	30.601
12	38	1	20.8429	1	0	0	1	0	0	1	3	138.375	102.299	36.076
12	38	1	20.8429	1	0	0	1	0	0	1	4	137.438	103.398	34.04
12	38	1	20.8429	1	0	0	1	0	0	1	5	149.391	103.47	45.921
12	38	1	20.8429	1	0	0	1	0	0	1	6	141.025	103.941	37.084
12	38	1	20.8429	1	0	0	2	1	0	2	1	123.795	105.621	18.174
12	38	1	20.8429	1	0	0	2	1	0	2	2	126.634	104.572	22.062
12	38	1	20.8429	1	0	0	2	1	0	2	3	127.835	106.379	21.456
12	38	1	20.8429	1	0	0	2	1	0	2	4	124.141	106.117	18.024
12	38	1	20.8429	1	0	0	2	1	0	2	5	127.937	105.281	22.656
12	38	1	20.8429	1	0	0	2	1	0	2	6	130.746	106.079	24.667
12	38	1	20.8429	1	0	0	3	0	1	3	1	136.997	108.319	28.678
12	38	1	20.8429	1	0	0	3	0	1	3	2	138.323	106.834	31.489
12	38	1	20.8429	1	0	0	3	0	1	3	3	136.884	107.436	29.448
12	38	1	20.8429	1	0	0	3	0	1	3	4	135.79	108.282	27.508
12	38	1	20.8429	1	0	0	3	0	1	3	5	137.338	108	29.338
12	38	1	20.8429	1	0	0	3	0	1	3	6	135.79	108.277	27.513
12	38	1	20.8429	2	1	0	1	0	0	4	1	134.226	103.501	30.725
12	38	1	20.8429	2	1	0	1	0	0	4	2	133.328	103.753	29.575
12	38	1	20.8429	2	1	0	1	0	0	4	3	135.786	103.068	32.718
12	38	1	20.8429	2	1	0	1	0	0	4	4	133.296	102.965	30.331
12	38	1	20.8429	2	1	0	1	0	0	4	5	133.131	102.204	30.927
12	38	1	20.8429	2	1	0	1	0	0	4	6	133.015	102.421	30.594
12	38	1	20.8429	2	1	0	2	1	0	5	1
12	38	1	20.8429	2	1	0	2	1	0	5	2
12	38	1	20.8429	2	1	0	2	1	0	5	3
12	38	1	20.8429	2	1	0	2	1	0	5	4
12	38	1	20.8429	2	1	0	2	1	0	5	5
12	38	1	20.8429	2	1	0	2	1	0	5	6
12	38	1	20.8429	2	1	0	3	0	1	6	1	134.578	105.565	29.013
12	38	1	20.8429	2	1	0	3	0	1	6	2	134.54	104.572	29.968
12	38	1	20.8429	2	1	0	3	0	1	6	3	130.819	105.395	25.424
12	38	1	20.8429	2	1	0	3	0	1	6	4	132.578	105.321	27.257
12	38	1	20.8429	2	1	0	3	0	1	6	5	133.043	105.987	27.056
12	38	1	20.8429	2	1	0	3	0	1	6	6	133.214	104.529	28.685
12	38	1	20.8429	3	0	1	1	0	0	7	1	131.788	103.6	28.188
12	38	1	20.8429	3	0	1	1	0	0	7	2	132.083	104.169	27.914
12	38	1	20.8429	3	0	1	1	0	0	7	3	131.64	102.73	28.91
12	38	1	20.8429	3	0	1	1	0	0	7	4	132.803	101.298	31.505
12	38	1	20.8429	3	0	1	1	0	0	7	5	133.746	101.506	32.24
12	38	1	20.8429	3	0	1	1	0	0	7	6	129.243	102.768	26.475
12	38	1	20.8429	3	0	1	2	1	0	8	1	117.917	101.015	16.902
12	38	1	20.8429	3	0	1	2	1	0	8	2	120.253	99.305	20.948
12	38	1	20.8429	3	0	1	2	1	0	8	3	121.742	99.616	22.126
12	38	1	20.8429	3	0	1	2	1	0	8	4	123.659	100.889	22.77
12	38	1	20.8429	3	0	1	2	1	0	8	5	122.903	100.489	22.414
12	38	1	20.8429	3	0	1	2	1	0	8	6	123.502	100.086	23.416
12	38	1	20.8429	3	0	1	3	0	1	9	1	134.578	105.565	29.013
12	38	1	20.8429	3	0	1	3	0	1	9	2	134.54	104.572	29.968
12	38	1	20.8429	3	0	1	3	0	1	9	3	130.819	105.308	25.511
12	38	1	20.8429	3	0	1	3	0	1	9	4	132.578	105.321	27.257
12	38	1	20.8429	3	0	1	3	0	1	9	5	133.043	105.987	27.056
12	38	1	20.8429	3	0	1	3	0	1	9	6	133.214	104.529	28.685
13	59	0	22.6627	1	0	0	1	0	0	1	1	118.299	105.44	12.859
13	59	0	22.6627	1	0	0	1	0	0	1	2	116.557	107.472	9.085
13	59	0	22.6627	1	0	0	1	0	0	1	3	115.851	106.74	9.111
13	59	0	22.6627	1	0	0	1	0	0	1	4	116.066	105.437	10.629
13	59	0	22.6627	1	0	0	1	0	0	1	5	116.456	106.088	10.368
13	59	0	22.6627	1	0	0	1	0	0	1	6	115.496	106.875	8.621
13	59	0	22.6627	1	0	0	2	1	0	2	1	114.341	105.605	8.736
13	59	0	22.6627	1	0	0	2	1	0	2	2	116.832	104.59	12.242
13	59	0	22.6627	1	0	0	2	1	0	2	3	115.028	104.374	10.654
13	59	0	22.6627	1	0	0	2	1	0	2	4	114.616	105.251	9.365
13	59	0	22.6627	1	0	0	2	1	0	2	5	115.601	105.395	10.206
13	59	0	22.6627	1	0	0	2	1	0	2	6	113.8	105.19	8.61
13	59	0	22.6627	1	0	0	3	0	1	3	1	119.046	106.976	12.07
13	59	0	22.6627	1	0	0	3	0	1	3	2	119.086	108.437	10.649
13	59	0	22.6627	1	0	0	3	0	1	3	3	121.576	108.305	13.271
13	59	0	22.6627	1	0	0	3	0	1	3	4	119.852	109.139	10.713
13	59	0	22.6627	1	0	0	3	0	1	3	5	118.749	107.194	11.555
13	59	0	22.6627	1	0	0	3	0	1	3	6	119.284	110.43	8.854
13	59	0	22.6627	2	1	0	1	0	0	4	1	128.69	111.918	16.772
13	59	0	22.6627	2	1	0	1	0	0	4	2	128.863	111.036	17.827
13	59	0	22.6627	2	1	0	1	0	0	4	3	130.742	111.03	19.712
13	59	0	22.6627	2	1	0	1	0	0	4	4	127.971	111.396	16.575
13	59	0	22.6627	2	1	0	1	0	0	4	5	128.045	111.828	16.217
13	59	0	22.6627	2	1	0	1	0	0	4	6	127.494	111.513	15.981
13	59	0	22.6627	2	1	0	2	1	0	5	1	126.252	114.84	11.412
13	59	0	22.6627	2	1	0	2	1	0	5	2	128.213	114.458	13.755
13	59	0	22.6627	2	1	0	2	1	0	5	3	126.64	114.141	12.499
13	59	0	22.6627	2	1	0	2	1	0	5	4	130.703	113.345	17.358
13	59	0	22.6627	2	1	0	2	1	0	5	5	129.126	109.488	19.638
13	59	0	22.6627	2	1	0	2	1	0	5	6	127.792	110.951	16.841
13	59	0	22.6627	2	1	0	3	0	1	6	1	121.137	106.709	14.428
13	59	0	22.6627	2	1	0	3	0	1	6	2	123.31	106.99	16.32
13	59	0	22.6627	2	1	0	3	0	1	6	3	121.496	106.188	15.308
13	59	0	22.6627	2	1	0	3	0	1	6	4	123.291	106.273	17.018
13	59	0	22.6627	2	1	0	3	0	1	6	5	122.801	105.692	17.109
13	59	0	22.6627	2	1	0	3	0	1	6	6	123.393	105.247	18.146
13	59	0	22.6627	3	0	1	1	0	0	7	1	123.065	106.776	16.289
13	59	0	22.6627	3	0	1	1	0	0	7	2	121.405	107.421	13.984
13	59	0	22.6627	3	0	1	1	0	0	7	3	119.3	107.777	11.523
13	59	0	22.6627	3	0	1	1	0	0	7	4	123.336	107.403	15.933
13	59	0	22.6627	3	0	1	1	0	0	7	5	120.211	107.866	12.345
13	59	0	22.6627	3	0	1	1	0	0	7	6	121.321	107.251	14.07
13	59	0	22.6627	3	0	1	2	1	0	8	1	121.028	111.963	9.065
13	59	0	22.6627	3	0	1	2	1	0	8	2	121.834	111.527	10.307
13	59	0	22.6627	3	0	1	2	1	0	8	3	119.914	110.365	9.549
13	59	0	22.6627	3	0	1	2	1	0	8	4	120.813	110.721	10.092
13	59	0	22.6627	3	0	1	2	1	0	8	5	122.277	109.661	12.616
13	59	0	22.6627	3	0	1	2	1	0	8	6	118.658	109.18	9.478
13	59	0	22.6627	3	0	1	3	0	1	9	1	118.988	94.68	24.308
13	59	0	22.6627	3	0	1	3	0	1	9	2	119.849	99.87	19.979
13	59	0	22.6627	3	0	1	3	0	1	9	3	120.188	90.608	29.58
13	59	0	22.6627	3	0	1	3	0	1	9	4	117.645	92	25.645
13	59	0	22.6627	3	0	1	3	0	1	9	5	115.057	91.058	23.999
13	59	0	22.6627	3	0	1	3	0	1	9	6	118.228	91.755	26.473
14	25	1	37.5149	1	0	0	1	0	0	1	1	125.283	102.128	23.155
14	25	1	37.5149	1	0	0	1	0	0	1	2	126.062	100.863	25.199
14	25	1	37.5149	1	0	0	1	0	0	1	3	125.557	100.986	24.571
14	25	1	37.5149	1	0	0	1	0	0	1	4	124.759	101.828	22.931
14	25	1	37.5149	1	0	0	1	0	0	1	5	125.019	98.762	26.257
14	25	1	37.5149	1	0	0	1	0	0	1	6	125.962	101.652	24.31
14	25	1	37.5149	1	0	0	2	1	0	2	1	121.741	98.445	23.296
14	25	1	37.5149	1	0	0	2	1	0	2	2	120.583	99.074	21.509
14	25	1	37.5149	1	0	0	2	1	0	2	3	121.828	97.352	24.476
14	25	1	37.5149	1	0	0	2	1	0	2	4	119.979	98.742	21.237
14	25	1	37.5149	1	0	0	2	1	0	2	5	121.632	97.877	23.755
14	25	1	37.5149	1	0	0	2	1	0	2	6	120.858	97.685	23.173
14	25	1	37.5149	1	0	0	3	0	1	3	1	125.677	101.352	24.325
14	25	1	37.5149	1	0	0	3	0	1	3	2	128.448	102.422	26.026
14	25	1	37.5149	1	0	0	3	0	1	3	3	128.19	115.031	13.159
14	25	1	37.5149	1	0	0	3	0	1	3	4	122.553	103.083	19.47
14	25	1	37.5149	1	0	0	3	0	1	3	5	128.507	101.112	27.395
14	25	1	37.5149	1	0	0	3	0	1	3	6	126.216	98.546	27.67
14	25	1	37.5149	2	1	0	1	0	0	4	1	132.243	107.618	24.625
14	25	1	37.5149	2	1	0	1	0	0	4	2	132.235	105.9	26.335
14	25	1	37.5149	2	1	0	1	0	0	4	3	131.721	106.198	25.523
14	25	1	37.5149	2	1	0	1	0	0	4	4	134.941	106.819	28.122
14	25	1	37.5149	2	1	0	1	0	0	4	5	133.765	107.409	26.356
14	25	1	37.5149	2	1	0	1	0	0	4	6	132.914	106.713	26.201
14	25	1	37.5149	2	1	0	2	1	0	5	1	124.997	100.094	24.903
14	25	1	37.5149	2	1	0	2	1	0	5	2	122.631	102.579	20.052
14	25	1	37.5149	2	1	0	2	1	0	5	3	123.003	101.447	21.556
14	25	1	37.5149	2	1	0	2	1	0	5	4	126.741	102.354	24.387
14	25	1	37.5149	2	1	0	2	1	0	5	5	125.052	102.31	22.742
14	25	1	37.5149	2	1	0	2	1	0	5	6	125.799	101.648	24.151
14	25	1	37.5149	2	1	0	3	0	1	6	1	130.086	98.908	31.178
14	25	1	37.5149	2	1	0	3	0	1	6	2	129.555	99.76	29.795
14	25	1	37.5149	2	1	0	3	0	1	6	3	126.972	97.55	29.422
14	25	1	37.5149	2	1	0	3	0	1	6	4	126.677	99.199	27.478
14	25	1	37.5149	2	1	0	3	0	1	6	5	123.088	98.278	24.81
14	25	1	37.5149	2	1	0	3	0	1	6	6	127.481	100.809	26.672
14	25	1	37.5149	3	0	1	1	0	0	7	1	112.164	93.801	18.363
14	25	1	37.5149	3	0	1	1	0	0	7	2	110.809	93.804	17.005
14	25	1	37.5149	3	0	1	1	0	0	7	3	108.645	93.413	15.232
14	25	1	37.5149	3	0	1	1	0	0	7	4	110.932	92.014	18.918
14	25	1	37.5149	3	0	1	1	0	0	7	5	111.096	93.606	17.49
14	25	1	37.5149	3	0	1	1	0	0	7	6	112.459	94.243	18.216
14	25	1	37.5149	3	0	1	2	1	0	8	1	118.31	96.219	22.091
14	25	1	37.5149	3	0	1	2	1	0	8	2	112.098	94.01	18.088
14	25	1	37.5149	3	0	1	2	1	0	8	3	117.925	95.389	22.536
14	25	1	37.5149	3	0	1	2	1	0	8	4	119.422	94.302	25.12
14	25	1	37.5149	3	0	1	2	1	0	8	5	120.116	94.518	25.598
14	25	1	37.5149	3	0	1	2	1	0	8	6	117.666	95.338	22.328
14	25	1	37.5149	3	0	1	3	0	1	9	1	125.455	103.334	22.121
14	25	1	37.5149	3	0	1	3	0	1	9	2	127.14	104.142	22.998
14	25	1	37.5149	3	0	1	3	0	1	9	3	124.924	102.018	22.906
14	25	1	37.5149	3	0	1	3	0	1	9	4	122.83	101.588	21.242
14	25	1	37.5149	3	0	1	3	0	1	9	5	119.358	104.578	14.78
14	25	1	37.5149	3	0	1	3	0	1	9	6	125.327	103.743	21.584
15	39	1	24.0138	1	0	0	1	0	0	1	1	121.711	100.051	21.66
15	39	1	24.0138	1	0	0	1	0	0	1	2	125.568	101.323	24.245
15	39	1	24.0138	1	0	0	1	0	0	1	3	127.044	100.559	26.485
15	39	1	24.0138	1	0	0	1	0	0	1	4	124.103	99.593	24.51
15	39	1	24.0138	1	0	0	1	0	0	1	5	127.069	100.966	26.103
15	39	1	24.0138	1	0	0	1	0	0	1	6	125.315	100.942	24.373
15	39	1	24.0138	1	0	0	2	1	0	2	1	123.183	102.519	20.664
15	39	1	24.0138	1	0	0	2	1	0	2	2	124.378	101.288	23.09
15	39	1	24.0138	1	0	0	2	1	0	2	3	125.92	100.734	25.186
15	39	1	24.0138	1	0	0	2	1	0	2	4	124.848	100.948	23.9
15	39	1	24.0138	1	0	0	2	1	0	2	5	124.272	101.449	22.823
15	39	1	24.0138	1	0	0	2	1	0	2	6	124.992	100.603	24.389
15	39	1	24.0138	1	0	0	3	0	1	3	1	128.981	103.088	25.893
15	39	1	24.0138	1	0	0	3	0	1	3	2	132.091	106.163	25.928
15	39	1	24.0138	1	0	0	3	0	1	3	3	134.468	106.343	28.125
15	39	1	24.0138	1	0	0	3	0	1	3	4	137.292	105.118	32.174
15	39	1	24.0138	1	0	0	3	0	1	3	5	131.705	104.804	26.901
15	39	1	24.0138	1	0	0	3	0	1	3	6	131.426	103.77	27.656
15	39	1	24.0138	2	1	0	1	0	0	4	1	139.61	108.309	31.301
15	39	1	24.0138	2	1	0	1	0	0	4	2	139.137	110.158	28.979
15	39	1	24.0138	2	1	0	1	0	0	4	3	139.971	110.077	29.894
15	39	1	24.0138	2	1	0	1	0	0	4	4	140.126	108.781	31.345
15	39	1	24.0138	2	1	0	1	0	0	4	5	139.879	109.038	30.841
15	39	1	24.0138	2	1	0	1	0	0	4	6	138.517	109.402	29.115
15	39	1	24.0138	2	1	0	2	1	0	5	1
15	39	1	24.0138	2	1	0	2	1	0	5	2
15	39	1	24.0138	2	1	0	2	1	0	5	3
15	39	1	24.0138	2	1	0	2	1	0	5	4
15	39	1	24.0138	2	1	0	2	1	0	5	5
15	39	1	24.0138	2	1	0	2	1	0	5	6
15	39	1	24.0138	2	1	0	3	0	1	6	1	139.816	112.054	27.762
15	39	1	24.0138	2	1	0	3	0	1	6	2	138.335	112.528	25.807
15	39	1	24.0138	2	1	0	3	0	1	6	3	141.102	114.945	26.157
15	39	1	24.0138	2	1	0	3	0	1	6	4	141.419	111.572	29.847
15	39	1	24.0138	2	1	0	3	0	1	6	5	136.792	113.071	23.721
15	39	1	24.0138	2	1	0	3	0	1	6	6	139.576	112.754	26.822
15	39	1	24.0138	3	0	1	1	0	0	7	1	131.661	105.767	25.894
15	39	1	24.0138	3	0	1	1	0	0	7	2	131.247	102.501	28.746
15	39	1	24.0138	3	0	1	1	0	0	7	3	131.999	103.821	28.178
15	39	1	24.0138	3	0	1	1	0	0	7	4	130.899	103.427	27.472
15	39	1	24.0138	3	0	1	1	0	0	7	5	129.577	102.384	27.193
15	39	1	24.0138	3	0	1	1	0	0	7	6	130.296	104.305	25.991
15	39	1	24.0138	3	0	1	2	1	0	8	1	125.021	102.607	22.414
15	39	1	24.0138	3	0	1	2	1	0	8	2	125.904	102.464	23.44
15	39	1	24.0138	3	0	1	2	1	0	8	3	124.946	103.088	21.858
15	39	1	24.0138	3	0	1	2	1	0	8	4	128.317	101.62	26.697
15	39	1	24.0138	3	0	1	2	1	0	8	5	127.392	102.683	24.709
15	39	1	24.0138	3	0	1	2	1	0	8	6	125.538	102.354	23.184
15	39	1	24.0138	3	0	1	3	0	1	9	1	138.662	113.164	25.498
15	39	1	24.0138	3	0	1	3	0	1	9	2	137.993	112.976	25.017
15	39	1	24.0138	3	0	1	3	0	1	9	3	136.44	112.032	24.408
15	39	1	24.0138	3	0	1	3	0	1	9	4	138.874	112.646	26.228
15	39	1	24.0138	3	0	1	3	0	1	9	5	139.116	111.752	27.364
15	39	1	24.0138	3	0	1	3	0	1	9	6	138.932	111.983	26.949
16	46	0	29.3524	1	0	0	1	0	0	1	1	129.599	107.791	21.808
16	46	0	29.3524	1	0	0	1	0	0	1	2	125.339	106.773	18.566
16	46	0	29.3524	1	0	0	1	0	0	1	3	124.129	107.397	16.732
16	46	0	29.3524	1	0	0	1	0	0	1	4	129.419	107.553	21.866
16	46	0	29.3524	1	0	0	1	0	0	1	5	130.726	108.87	21.856
16	46	0	29.3524	1	0	0	1	0	0	1	6	129.153	106.678	22.475
16	46	0	29.3524	1	0	0	2	1	0	2	1	125.845	106.102	19.743
16	46	0	29.3524	1	0	0	2	1	0	2	2	125.87	106.391	19.479
16	46	0	29.3524	1	0	0	2	1	0	2	3	124.508	104.399	20.109
16	46	0	29.3524	1	0	0	2	1	0	2	4	126.033	102.273	23.76
16	46	0	29.3524	1	0	0	2	1	0	2	5	125.18	104.385	20.795
16	46	0	29.3524	1	0	0	2	1	0	2	6	124.403	106.236	18.167
16	46	0	29.3524	1	0	0	3	0	1	3	1	129.9	106.813	23.087
16	46	0	29.3524	1	0	0	3	0	1	3	2	129.178	105.611	23.567
16	46	0	29.3524	1	0	0	3	0	1	3	3	128.744	107.348	21.396
16	46	0	29.3524	1	0	0	3	0	1	3	4	131.462	106.668	24.794
16	46	0	29.3524	1	0	0	3	0	1	3	5	134.87	107.418	27.452
16	46	0	29.3524	1	0	0	3	0	1	3	6	132.012	104.821	27.191
16	46	0	29.3524	2	1	0	1	0	0	4	1	138.134	113.164	24.97
16	46	0	29.3524	2	1	0	1	0	0	4	2	138.941	110.991	27.95
16	46	0	29.3524	2	1	0	1	0	0	4	3	134.25	112.388	21.862
16	46	0	29.3524	2	1	0	1	0	0	4	4	138.022	111.52	26.502
16	46	0	29.3524	2	1	0	1	0	0	4	5	135.968	112.516	23.452
16	46	0	29.3524	2	1	0	1	0	0	4	6	139.681	113.092	26.589
16	46	0	29.3524	2	1	0	2	1	0	5	1	131.433	108.573	22.86
16	46	0	29.3524	2	1	0	2	1	0	5	2	130.341	108.458	21.883
16	46	0	29.3524	2	1	0	2	1	0	5	3	130.992	107.744	23.248
16	46	0	29.3524	2	1	0	2	1	0	5	4	133.67	107.758	25.912
16	46	0	29.3524	2	1	0	2	1	0	5	5	130.993	108.311	22.682
16	46	0	29.3524	2	1	0	2	1	0	5	6	131.604	108.468	23.136
16	46	0	29.3524	2	1	0	3	0	1	6	1	139.52	114.045	25.475
16	46	0	29.3524	2	1	0	3	0	1	6	2	135.408	114.596	20.812
16	46	0	29.3524	2	1	0	3	0	1	6	3	137.088	114.628	22.46
16	46	0	29.3524	2	1	0	3	0	1	6	4	135.719	114.05	21.669
16	46	0	29.3524	2	1	0	3	0	1	6	5	137.893	114.771	23.122
16	46	0	29.3524	2	1	0	3	0	1	6	6	137.768	114.926	22.842
16	46	0	29.3524	3	0	1	1	0	0	7	1	126.83	106.866	19.964
16	46	0	29.3524	3	0	1	1	0	0	7	2	127.904	106.64	21.264
16	46	0	29.3524	3	0	1	1	0	0	7	3	125.358	107.139	18.219
16	46	0	29.3524	3	0	1	1	0	0	7	4	128.759	107.309	21.45
16	46	0	29.3524	3	0	1	1	0	0	7	5	106.77	108.372	1.602
16	46	0	29.3524	3	0	1	1	0	0	7	6	129.898	109.021	20.877
16	46	0	29.3524	3	0	1	2	1	0	8	1	134.994	109.314	25.68
16	46	0	29.3524	3	0	1	2	1	0	8	2	132.402	110.06	22.342
16	46	0	29.3524	3	0	1	2	1	0	8	3	132.394	111.04	21.354
16	46	0	29.3524	3	0	1	2	1	0	8	4	130.873	111.878	18.995
16	46	0	29.3524	3	0	1	2	1	0	8	5	130.739	109.864	20.875
16	46	0	29.3524	3	0	1	2	1	0	8	6	134.226	108.069	26.157
16	46	0	29.3524	3	0	1	3	0	1	9	1	132.043	111.457	20.586
16	46	0	29.3524	3	0	1	3	0	1	9	2	133.926	111.534	22.392
16	46	0	29.3524	3	0	1	3	0	1	9	3	134.041	108.289	25.752
16	46	0	29.3524	3	0	1	3	0	1	9	4	133.474	111.066	22.408
16	46	0	29.3524	3	0	1	3	0	1	9	5	133.053	110.56	22.493
16	46	0	29.3524	3	0	1	3	0	1	9	6	134.548	110.137	24.411
17	20	1	19.3294	1	0	0	1	0	0	1	1	125.067	97.283	27.784
17	20	1	19.3294	1	0	0	1	0	0	1	2	123.571	97.101	26.47
17	20	1	19.3294	1	0	0	1	0	0	1	3	123.199	97.495	25.704
17	20	1	19.3294	1	0	0	1	0	0	1	4	124.43	97.107	27.323
17	20	1	19.3294	1	0	0	1	0	0	1	5	119.578	97.444	22.134
17	20	1	19.3294	1	0	0	1	0	0	1	6	123.404	96.754	26.65
17	20	1	19.3294	1	0	0	2	1	0	2	1	125.735	103.471	22.264
17	20	1	19.3294	1	0	0	2	1	0	2	2	128.569	104.86	23.709
17	20	1	19.3294	1	0	0	2	1	0	2	3	127.083	102.825	24.258
17	20	1	19.3294	1	0	0	2	1	0	2	4	126.508	104.664	21.844
17	20	1	19.3294	1	0	0	2	1	0	2	5	126.621	104.481	22.14
17	20	1	19.3294	1	0	0	2	1	0	2	6	127.09	104.594	22.496
17	20	1	19.3294	1	0	0	3	0	1	3	1	128.46	98.155	30.305
17	20	1	19.3294	1	0	0	3	0	1	3	2	125.282	96.978	28.304
17	20	1	19.3294	1	0	0	3	0	1	3	3	122.758	98.529	24.229
17	20	1	19.3294	1	0	0	3	0	1	3	4	129.235	98.274	30.961
17	20	1	19.3294	1	0	0	3	0	1	3	5	126.543	97.308	29.235
17	20	1	19.3294	1	0	0	3	0	1	3	6	126.358	98.311	28.047
17	20	1	19.3294	2	1	0	1	0	0	4	1	122.198	101.575	20.623
17	20	1	19.3294	2	1	0	1	0	0	4	2	120.835	103.191	17.644
17	20	1	19.3294	2	1	0	1	0	0	4	3	122.038	101.406	20.632
17	20	1	19.3294	2	1	0	1	0	0	4	4	124.947	102.619	22.328
17	20	1	19.3294	2	1	0	1	0	0	4	5	125.312	101.773	23.539
17	20	1	19.3294	2	1	0	1	0	0	4	6	129.096	101.967	27.129
17	20	1	19.3294	2	1	0	2	1	0	5	1
17	20	1	19.3294	2	1	0	2	1	0	5	2
17	20	1	19.3294	2	1	0	2	1	0	5	3
17	20	1	19.3294	2	1	0	2	1	0	5	4
17	20	1	19.3294	2	1	0	2	1	0	5	5
17	20	1	19.3294	2	1	0	2	1	0	5	6
17	20	1	19.3294	2	1	0	3	0	1	6	1	132.153	105.034	27.119
17	20	1	19.3294	2	1	0	3	0	1	6	2	135.733	102.267	33.466
17	20	1	19.3294	2	1	0	3	0	1	6	3	133.35	104.301	29.049
17	20	1	19.3294	2	1	0	3	0	1	6	4	133.195	104.413	28.782
17	20	1	19.3294	2	1	0	3	0	1	6	5	135.589	103.567	32.022
17	20	1	19.3294	2	1	0	3	0	1	6	6	133.098	103.261	29.837
17	20	1	19.3294	3	0	1	1	0	0	7	1	121.459	100.226	21.233
17	20	1	19.3294	3	0	1	1	0	0	7	2	119.195	99.456	19.739
17	20	1	19.3294	3	0	1	1	0	0	7	3	124.838	99.115	25.723
17	20	1	19.3294	3	0	1	1	0	0	7	4	123.729	98.931	24.798
17	20	1	19.3294	3	0	1	1	0	0	7	5	125.461	100.001	25.46
17	20	1	19.3294	3	0	1	1	0	0	7	6	122.733	99.617	23.116
17	20	1	19.3294	3	0	1	2	1	0	8	1	127.479	103.729	23.75
17	20	1	19.3294	3	0	1	2	1	0	8	2	128.36	104.762	23.598
17	20	1	19.3294	3	0	1	2	1	0	8	3	125.418	102.5	22.918
17	20	1	19.3294	3	0	1	2	1	0	8	4	126.182	103.826	22.356
17	20	1	19.3294	3	0	1	2	1	0	8	5	125.827	104.563	21.264
17	20	1	19.3294	3	0	1	2	1	0	8	6	127.71	104.603	23.107
17	20	1	19.3294	3	0	1	3	0	1	9	1	125.722	99.213	26.509
17	20	1	19.3294	3	0	1	3	0	1	9	2	120.361	96.625	23.736
17	20	1	19.3294	3	0	1	3	0	1	9	3	123.26	99.359	23.901
17	20	1	19.3294	3	0	1	3	0	1	9	4	123.598	101.248	22.35
17	20	1	19.3294	3	0	1	3	0	1	9	5	125.256	98.139	27.117
17	20	1	19.3294	3	0	1	3	0	1	9	6	125.488	98.146	27.342
18	29	0	27.4361	1	0	0	1	0	0	1	1	136.76	109.807	26.953
18	29	0	27.4361	1	0	0	1	0	0	1	2	131.998	111.335	20.663
18	29	0	27.4361	1	0	0	1	0	0	1	3	135.806	110.186	25.62
18	29	0	27.4361	1	0	0	1	0	0	1	4	132.81	111.502	21.308
18	29	0	27.4361	1	0	0	1	0	0	1	5	133.094	111.766	21.328
18	29	0	27.4361	1	0	0	1	0	0	1	6	134.345	111.528	22.817
18	29	0	27.4361	1	0	0	2	1	0	2	1	130.298	111.155	19.143
18	29	0	27.4361	1	0	0	2	1	0	2	2	128.024	110.132	17.892
18	29	0	27.4361	1	0	0	2	1	0	2	3	127.152	108.553	18.599
18	29	0	27.4361	1	0	0	2	1	0	2	4	122.811	112.274	10.537
18	29	0	27.4361	1	0	0	2	1	0	2	5	130.244	109.886	20.358
18	29	0	27.4361	1	0	0	2	1	0	2	6	126.38	109.591	16.789
18	29	0	27.4361	1	0	0	3	0	1	3	1	126.858	103.395	23.463
18	29	0	27.4361	1	0	0	3	0	1	3	2	127.281	104.357	22.924
18	29	0	27.4361	1	0	0	3	0	1	3	3	124.812	105.462	19.35
18	29	0	27.4361	1	0	0	3	0	1	3	4	130.036	104.726	25.31
18	29	0	27.4361	1	0	0	3	0	1	3	5	129.06	107.33	21.73
18	29	0	27.4361	1	0	0	3	0	1	3	6	130.333	104.976	25.357
18	29	0	27.4361	2	1	0	1	0	0	4	1	140.173	107.02	33.153
18	29	0	27.4361	2	1	0	1	0	0	4	2	139.012	108.569	30.443
18	29	0	27.4361	2	1	0	1	0	0	4	3	138.745	107.654	31.091
18	29	0	27.4361	2	1	0	1	0	0	4	4	138.357	108.41	29.947
18	29	0	27.4361	2	1	0	1	0	0	4	5	137.989	105.426	32.563
18	29	0	27.4361	2	1	0	1	0	0	4	6	136.611	103.82	32.791
18	29	0	27.4361	2	1	0	2	1	0	5	1	130.069	104.713	25.356
18	29	0	27.4361	2	1	0	2	1	0	5	2	129.941	106.152	23.789
18	29	0	27.4361	2	1	0	2	1	0	5	3	133.541	101.266	32.275
18	29	0	27.4361	2	1	0	2	1	0	5	4	128.652	100.897	27.755
18	29	0	27.4361	2	1	0	2	1	0	5	5	131.018	105.126	25.892
18	29	0	27.4361	2	1	0	2	1	0	5	6	132.308	103.245	29.063
18	29	0	27.4361	2	1	0	3	0	1	6	1	133.555	100.51	33.045
18	29	0	27.4361	2	1	0	3	0	1	6	2	133.858	111.779	22.079
18	29	0	27.4361	2	1	0	3	0	1	6	3	135.28	98.474	36.806
18	29	0	27.4361	2	1	0	3	0	1	6	4	133.62	100.472	33.148
18	29	0	27.4361	2	1	0	3	0	1	6	5	133.044	100.249	32.795
18	29	0	27.4361	2	1	0	3	0	1	6	6	134.974	99.162	35.812
18	29	0	27.4361	3	0	1	1	0	0	7	1	134.839	107.489	27.35
18	29	0	27.4361	3	0	1	1	0	0	7	2	134.497	106.483	28.014
18	29	0	27.4361	3	0	1	1	0	0	7	3	133.336	108.469	24.867
18	29	0	27.4361	3	0	1	1	0	0	7	4	135.78	104.804	30.976
18	29	0	27.4361	3	0	1	1	0	0	7	5	132.651	107.421	25.23
18	29	0	27.4361	3	0	1	1	0	0	7	6	132.797	105.886	26.911
18	29	0	27.4361	3	0	1	2	1	0	8	1	133.794	111.579	22.215
18	29	0	27.4361	3	0	1	2	1	0	8	2	135.024	107.943	27.081
18	29	0	27.4361	3	0	1	2	1	0	8	3	133.052	108.723	24.329
18	29	0	27.4361	3	0	1	2	1	0	8	4	132.771	109.73	23.041
18	29	0	27.4361	3	0	1	2	1	0	8	5	133.569	109.754	23.815
18	29	0	27.4361	3	0	1	2	1	0	8	6	133.598	107.377	26.221
18	29	0	27.4361	3	0	1	3	0	1	9	1	134.393	110.378	24.015
18	29	0	27.4361	3	0	1	3	0	1	9	2	135.73	111.142	24.588
18	29	0	27.4361	3	0	1	3	0	1	9	3	132.455	108.018	24.437
18	29	0	27.4361	3	0	1	3	0	1	9	4	133.409	108.641	24.768
18	29	0	27.4361	3	0	1	3	0	1	9	5	130.597	108.732	21.865
18	29	0	27.4361	3	0	1	3	0	1	9	6	132.004	111.471	20.533
19	33	1	30.0947	1	0	0	1	0	0	1	1	130.746	109.543	21.203
19	33	1	30.0947	1	0	0	1	0	0	1	2	132.938	110.317	22.621
19	33	1	30.0947	1	0	0	1	0	0	1	3	138.489	110.952	27.537
19	33	1	30.0947	1	0	0	1	0	0	1	4	139.57	109.415	30.155
19	33	1	30.0947	1	0	0	1	0	0	1	5	137.739	109.599	28.14
19	33	1	30.0947	1	0	0	1	0	0	1	6	135.127	108.933	26.194
19	33	1	30.0947	1	0	0	2	1	0	2	1	136.169	110.076	26.093
19	33	1	30.0947	1	0	0	2	1	0	2	2	136.489	109.286	27.203
19	33	1	30.0947	1	0	0	2	1	0	2	3	137.628	110.027	27.601
19	33	1	30.0947	1	0	0	2	1	0	2	4	134.546	110.281	24.265
19	33	1	30.0947	1	0	0	2	1	0	2	5	135.396	110.367	25.029
19	33	1	30.0947	1	0	0	2	1	0	2	6	134.096	110.275	23.821
19	33	1	30.0947	1	0	0	3	0	1	3	1	132.39	98.62	33.77
19	33	1	30.0947	1	0	0	3	0	1	3	2	131.241	97.239	34.002
19	33	1	30.0947	1	0	0	3	0	1	3	3	127.852	98.22	29.632
19	33	1	30.0947	1	0	0	3	0	1	3	4	125.556	98.943	26.613
19	33	1	30.0947	1	0	0	3	0	1	3	5	129.894	98.264	31.63
19	33	1	30.0947	1	0	0	3	0	1	3	6	129.194	98.133	31.061
19	33	1	30.0947	2	1	0	1	0	0	4	1	128.969	103.936	25.033
19	33	1	30.0947	2	1	0	1	0	0	4	2	131.142	102.873	28.269
19	33	1	30.0947	2	1	0	1	0	0	4	3	132.678	103.288	29.39
19	33	1	30.0947	2	1	0	1	0	0	4	4	129.56	104.199	25.361
19	33	1	30.0947	2	1	0	1	0	0	4	5	133.861	103.082	30.779
19	33	1	30.0947	2	1	0	1	0	0	4	6	128.752	102.59	26.162
19	33	1	30.0947	2	1	0	2	1	0	5	1
19	33	1	30.0947	2	1	0	2	1	0	5	2
19	33	1	30.0947	2	1	0	2	1	0	5	3
19	33	1	30.0947	2	1	0	2	1	0	5	4
19	33	1	30.0947	2	1	0	2	1	0	5	5
19	33	1	30.0947	2	1	0	2	1	0	5	6
19	33	1	30.0947	2	1	0	3	0	1	6	1	140.553	112.29	28.263
19	33	1	30.0947	2	1	0	3	0	1	6	2	144.483	112.448	32.035
19	33	1	30.0947	2	1	0	3	0	1	6	3	143.442	112.278	31.164
19	33	1	30.0947	2	1	0	3	0	1	6	4	141.725	112.806	28.919
19	33	1	30.0947	2	1	0	3	0	1	6	5	112.04	111.853	0.187
19	33	1	30.0947	2	1	0	3	0	1	6	6	138.986	110.267	28.719
19	33	1	30.0947	3	0	1	1	0	0	7	1	121.027	100.64	20.387
19	33	1	30.0947	3	0	1	1	0	0	7	2	119.478	100.044	19.434
19	33	1	30.0947	3	0	1	1	0	0	7	3	120.78	101.157	19.623
19	33	1	30.0947	3	0	1	1	0	0	7	4	121.893	101.541	20.352
19	33	1	30.0947	3	0	1	1	0	0	7	5	121.787	101.874	19.913
19	33	1	30.0947	3	0	1	1	0	0	7	6	122.981	101.248	21.733
19	33	1	30.0947	3	0	1	2	1	0	8	1	138.378	133.095	5.283
19	33	1	30.0947	3	0	1	2	1	0	8	2	139.299	113.079	26.22
19	33	1	30.0947	3	0	1	2	1	0	8	3	139.391	112.197	27.194
19	33	1	30.0947	3	0	1	2	1	0	8	4	139.378	112.71	26.668
19	33	1	30.0947	3	0	1	2	1	0	8	5	139.908	114.238	25.67
19	33	1	30.0947	3	0	1	2	1	0	8	6	138.116	114.75	23.366
19	33	1	30.0947	3	0	1	3	0	1	9	1	129.643	105.783	23.86
19	33	1	30.0947	3	0	1	3	0	1	9	2	130.572	105.953	24.619
19	33	1	30.0947	3	0	1	3	0	1	9	3	131.186	105.097	26.089
19	33	1	30.0947	3	0	1	3	0	1	9	4	131.81	104.152	27.658
19	33	1	30.0947	3	0	1	3	0	1	9	5	131.617	104.61	27.007
19	33	1	30.0947	3	0	1	3	0	1	9	6	133.233	104.232	29.001
20	40	0	22.3863	1	0	0	1	0	0	1	1	123.253	97.188	26.065
20	40	0	22.3863	1	0	0	1	0	0	1	2	121.454	98.185	23.269
20	40	0	22.3863	1	0	0	1	0	0	1	3	122.964	98.068	24.896
20	40	0	22.3863	1	0	0	1	0	0	1	4	125.06	97.791	27.269
20	40	0	22.3863	1	0	0	1	0	0	1	5	122.651	96.782	25.869
20	40	0	22.3863	1	0	0	1	0	0	1	6	125.729	97.97	27.759
20	40	0	22.3863	1	0	0	2	1	0	2	1	132.031	104.097	27.934
20	40	0	22.3863	1	0	0	2	1	0	2	2	122.303	104.064	18.239
20	40	0	22.3863	1	0	0	2	1	0	2	3	122.914	105.033	17.881
20	40	0	22.3863	1	0	0	2	1	0	2	4	125.889	103.434	22.455
20	40	0	22.3863	1	0	0	2	1	0	2	5	125.12	104.627	20.493
20	40	0	22.3863	1	0	0	2	1	0	2	6	127.484	103.71	23.774
20	40	0	22.3863	1	0	0	3	0	1	3	1	126.703	100.65	26.053
20	40	0	22.3863	1	0	0	3	0	1	3	2	123.963	101.508	22.455
20	40	0	22.3863	1	0	0	3	0	1	3	3	125.625	101.263	24.362
20	40	0	22.3863	1	0	0	3	0	1	3	4	126.075	100.928	25.147
20	40	0	22.3863	1	0	0	3	0	1	3	5	125.987	100.787	25.2
20	40	0	22.3863	1	0	0	3	0	1	3	6	125.302	100.65	24.652
20	40	0	22.3863	2	1	0	1	0	0	4	1	131.81	97.677	34.133
20	40	0	22.3863	2	1	0	1	0	0	4	2	130.439	97.751	32.688
20	40	0	22.3863	2	1	0	1	0	0	4	3	131.302	99.732	31.57
20	40	0	22.3863	2	1	0	1	0	0	4	4	135.81	98.056	37.754
20	40	0	22.3863	2	1	0	1	0	0	4	5	131.122	98.319	32.803
20	40	0	22.3863	2	1	0	1	0	0	4	6	131.825	98.005	33.82
20	40	0	22.3863	2	1	0	2	1	0	5	1	129.373	102.272	27.101
20	40	0	22.3863	2	1	0	2	1	0	5	2	129.646	102.64	27.006
20	40	0	22.3863	2	1	0	2	1	0	5	3	131.184	101.606	29.578
20	40	0	22.3863	2	1	0	2	1	0	5	4	125.777	102.215	23.562
20	40	0	22.3863	2	1	0	2	1	0	5	5	129.052	102.785	26.267
20	40	0	22.3863	2	1	0	2	1	0	5	6	131.165	102.341	28.824
20	40	0	22.3863	2	1	0	3	0	1	6	1	133.115	103.221	29.894
20	40	0	22.3863	2	1	0	3	0	1	6	2	134.116	102.412	31.704
20	40	0	22.3863	2	1	0	3	0	1	6	3	133.474	102.734	30.74
20	40	0	22.3863	2	1	0	3	0	1	6	4	135.485	102.476	33.009
20	40	0	22.3863	2	1	0	3	0	1	6	5	133.949	102.95	30.999
20	40	0	22.3863	2	1	0	3	0	1	6	6	132.583	102.855	29.728
20	40	0	22.3863	3	0	1	1	0	0	7	1	126.556	103.795	22.761
20	40	0	22.3863	3	0	1	1	0	0	7	2	128.079	102.538	25.541
20	40	0	22.3863	3	0	1	1	0	0	7	3	127.517	102.995	24.522
20	40	0	22.3863	3	0	1	1	0	0	7	4	126.97	101.906	25.064
20	40	0	22.3863	3	0	1	1	0	0	7	5	125.254	103.597	21.657
20	40	0	22.3863	3	0	1	1	0	0	7	6	127.316	101.586	25.73
20	40	0	22.3863	3	0	1	2	1	0	8	1	126.925	103.874	23.051
20	40	0	22.3863	3	0	1	2	1	0	8	2	127.08	105.096	21.984
20	40	0	22.3863	3	0	1	2	1	0	8	3	127.026	103.585	23.441
20	40	0	22.3863	3	0	1	2	1	0	8	4	124.06	104.636	19.424
20	40	0	22.3863	3	0	1	2	1	0	8	5	127.46	104.004	23.456
20	40	0	22.3863	3	0	1	2	1	0	8	6	126.217	103.551	22.666
20	40	0	22.3863	3	0	1	3	0	1	9	1	128.899	104.945	23.954
20	40	0	22.3863	3	0	1	3	0	1	9	2	130.67	103.831	26.839
20	40	0	22.3863	3	0	1	3	0	1	9	3	128.931	104.361	24.57
20	40	0	22.3863	3	0	1	3	0	1	9	4	129.835	104.102	25.733
20	40	0	22.3863	3	0	1	3	0	1	9	5	128.799	103.755	25.044
20	40	0	22.3863	3	0	1	3	0	1	9	6	129.462	104.031	25.431
21	21	1	21.9213	1	0	0	1	0	0	1	1	142.448	94.994	47.454
21	21	1	21.9213	1	0	0	1	0	0	1	2	138.25	93.693	44.557
21	21	1	21.9213	1	0	0	1	0	0	1	3	120.835	95.117	25.718
21	21	1	21.9213	1	0	0	1	0	0	1	4	132.056	97.339	34.717
21	21	1	21.9213	1	0	0	1	0	0	1	5	143.178	95.401	47.777
21	21	1	21.9213	1	0	0	1	0	0	1	6	140.439	96.71	43.729
21	21	1	21.9213	1	0	0	2	1	0	2	1	132.457	101.61	30.847
21	21	1	21.9213	1	0	0	2	1	0	2	2	134.596	104.852	29.744
21	21	1	21.9213	1	0	0	2	1	0	2	3	129.916	102.556	27.36
21	21	1	21.9213	1	0	0	2	1	0	2	4	131.505	101.901	29.604
21	21	1	21.9213	1	0	0	2	1	0	2	5	135.72	102.748	32.972
21	21	1	21.9213	1	0	0	2	1	0	2	6	133.755	102.49	31.265
21	21	1	21.9213	1	0	0	3	0	1	3	1	131.158	95.534	35.624
21	21	1	21.9213	1	0	0	3	0	1	3	2	137.667	95.29	42.377
21	21	1	21.9213	1	0	0	3	0	1	3	3	130.379	97.041	33.338
21	21	1	21.9213	1	0	0	3	0	1	3	4	125.301	104.882	20.419
21	21	1	21.9213	1	0	0	3	0	1	3	5	132.11	93.695	38.415
21	21	1	21.9213	1	0	0	3	0	1	3	6	132.977	93.106	39.871
21	21	1	21.9213	2	1	0	1	0	0	4	1	131.489	101.154	30.335
21	21	1	21.9213	2	1	0	1	0	0	4	2	123.384	101.309	22.075
21	21	1	21.9213	2	1	0	1	0	0	4	3	122.433	102.031	20.402
21	21	1	21.9213	2	1	0	1	0	0	4	4	132.739	102.487	30.252
21	21	1	21.9213	2	1	0	1	0	0	4	5	135.328	101.609	33.719
21	21	1	21.9213	2	1	0	1	0	0	4	6	142.547	100.942	41.605
21	21	1	21.9213	2	1	0	2	1	0	5	1
21	21	1	21.9213	2	1	0	2	1	0	5	2
21	21	1	21.9213	2	1	0	2	1	0	5	3
21	21	1	21.9213	2	1	0	2	1	0	5	4
21	21	1	21.9213	2	1	0	2	1	0	5	5
21	21	1	21.9213	2	1	0	2	1	0	5	6
21	21	1	21.9213	2	1	0	3	0	1	6	1	135.965	100.825	35.14
21	21	1	21.9213	2	1	0	3	0	1	6	2	135.977	102.082	33.895
21	21	1	21.9213	2	1	0	3	0	1	6	3	140.04	102.827	37.213
21	21	1	21.9213	2	1	0	3	0	1	6	4	142.929	97.254	45.675
21	21	1	21.9213	2	1	0	3	0	1	6	5	143.53	100.115	43.415
21	21	1	21.9213	2	1	0	3	0	1	6	6	138.041	98.738	39.303
21	21	1	21.9213	3	0	1	1	0	0	7	1	134.649	104.515	30.134
21	21	1	21.9213	3	0	1	1	0	0	7	2	135.118	102.6	32.518
21	21	1	21.9213	3	0	1	1	0	0	7	3	132.114	101.525	30.589
21	21	1	21.9213	3	0	1	1	0	0	7	4	129.395	102.774	26.621
21	21	1	21.9213	3	0	1	1	0	0	7	5	137.838	105.259	32.579
21	21	1	21.9213	3	0	1	1	0	0	7	6	128.354	105.324	23.03
21	21	1	21.9213	3	0	1	2	1	0	8	1	129.68	113.16	16.52
21	21	1	21.9213	3	0	1	2	1	0	8	2	136.516	114.353	22.163
21	21	1	21.9213	3	0	1	2	1	0	8	3	136.004	112.733	23.271
21	21	1	21.9213	3	0	1	2	1	0	8	4	135.59	114.076	21.514
21	21	1	21.9213	3	0	1	2	1	0	8	5	130.427	113.521	16.906
21	21	1	21.9213	3	0	1	2	1	0	8	6	132.394	112.688	19.706
21	21	1	21.9213	3	0	1	3	0	1	9	1	129.285	101.71	27.575
21	21	1	21.9213	3	0	1	3	0	1	9	2	131.134	106.025	25.109
21	21	1	21.9213	3	0	1	3	0	1	9	3	136.421	101.944	34.477
21	21	1	21.9213	3	0	1	3	0	1	9	4	138.585	102.681	35.904
21	21	1	21.9213	3	0	1	3	0	1	9	5	132.078	104.429	27.649
21	21	1	21.9213	3	0	1	3	0	1	9	6	135.332	106.759	28.573
22	30	1	22.8624	1	0	0	1	0	0	1	1
22	30	1	22.8624	1	0	0	1	0	0	1	2
22	30	1	22.8624	1	0	0	1	0	0	1	3
22	30	1	22.8624	1	0	0	1	0	0	1	4
22	30	1	22.8624	1	0	0	1	0	0	1	5
22	30	1	22.8624	1	0	0	1	0	0	1	6
22	30	1	22.8624	1	0	0	2	1	0	2	1
22	30	1	22.8624	1	0	0	2	1	0	2	2
22	30	1	22.8624	1	0	0	2	1	0	2	3
22	30	1	22.8624	1	0	0	2	1	0	2	4
22	30	1	22.8624	1	0	0	2	1	0	2	5
22	30	1	22.8624	1	0	0	2	1	0	2	6
22	30	1	22.8624	1	0	0	3	0	1	3	1
22	30	1	22.8624	1	0	0	3	0	1	3	2
22	30	1	22.8624	1	0	0	3	0	1	3	3
22	30	1	22.8624	1	0	0	3	0	1	3	4
22	30	1	22.8624	1	0	0	3	0	1	3	5
22	30	1	22.8624	1	0	0	3	0	1	3	6
22	30	1	22.8624	2	1	0	1	0	0	4	1	139.275	111.124	28.151
22	30	1	22.8624	2	1	0	1	0	0	4	2	141.81	110.429	31.381
22	30	1	22.8624	2	1	0	1	0	0	4	3	140.758	110.554	30.204
22	30	1	22.8624	2	1	0	1	0	0	4	4	141.498	110.201	31.297
22	30	1	22.8624	2	1	0	1	0	0	4	5	143.096	109.87	33.226
22	30	1	22.8624	2	1	0	1	0	0	4	6	139.719	108.371	31.348
22	30	1	22.8624	2	1	0	2	1	0	5	1	140.369	109.94	30.429
22	30	1	22.8624	2	1	0	2	1	0	5	2	138.72	109.31	29.41
22	30	1	22.8624	2	1	0	2	1	0	5	3	138.622	107.997	30.625
22	30	1	22.8624	2	1	0	2	1	0	5	4	137.803	112.042	25.761
22	30	1	22.8624	2	1	0	2	1	0	5	5	138.401	110.722	27.679
22	30	1	22.8624	2	1	0	2	1	0	5	6	138.527	110.125	28.402
22	30	1	22.8624	2	1	0	3	0	1	6	1	141.526	112.931	28.595
22	30	1	22.8624	2	1	0	3	0	1	6	2	141.307	112.635	28.672
22	30	1	22.8624	2	1	0	3	0	1	6	3	141.034	112.163	28.871
22	30	1	22.8624	2	1	0	3	0	1	6	4	140.015	112.695	27.32
22	30	1	22.8624	2	1	0	3	0	1	6	5	142.974	112.124	30.85
22	30	1	22.8624	2	1	0	3	0	1	6	6	141.59	111.569	30.021
22	30	1	22.8624	3	0	1	1	0	0	7	1	139.548	111.631	27.917
22	30	1	22.8624	3	0	1	1	0	0	7	2	142.261	111.43	30.831
22	30	1	22.8624	3	0	1	1	0	0	7	3	142.081	111.391	30.69
22	30	1	22.8624	3	0	1	1	0	0	7	4	139.038	112.341	26.697
22	30	1	22.8624	3	0	1	1	0	0	7	5	143.07	112.203	30.867
22	30	1	22.8624	3	0	1	1	0	0	7	6	141.01	113.457	27.553
22	30	1	22.8624	3	0	1	2	1	0	8	1	138.398	109.766	28.632
22	30	1	22.8624	3	0	1	2	1	0	8	2	138.695	109.65	29.045
22	30	1	22.8624	3	0	1	2	1	0	8	3	142.64	110.746	31.894
22	30	1	22.8624	3	0	1	2	1	0	8	4	136.351	109.831	26.52
22	30	1	22.8624	3	0	1	2	1	0	8	5	138.948	109.776	29.172
22	30	1	22.8624	3	0	1	2	1	0	8	6	138.145	110.927	27.218
22	30	1	22.8624	3	0	1	3	0	1	9	1	141.697	111.788	29.909
22	30	1	22.8624	3	0	1	3	0	1	9	2	141.738	112.832	28.906
22	30	1	22.8624	3	0	1	3	0	1	9	3	138.78	110.922	27.858
22	30	1	22.8624	3	0	1	3	0	1	9	4	138.777	111.174	27.603
22	30	1	22.8624	3	0	1	3	0	1	9	5	139.113	110.992	28.121
22	30	1	22.8624	3	0	1	3	0	1	9	6	141.774	110.645	31.129
23	36	1	32.4886	1	0	0	1	0	0	1	1	130.46	113.802	16.658
23	36	1	32.4886	1	0	0	1	0	0	1	2	133.294	112.241	21.053
23	36	1	32.4886	1	0	0	1	0	0	1	3	132.465	114.114	18.351
23	36	1	32.4886	1	0	0	1	0	0	1	4	128.897	112.802	16.095
23	36	1	32.4886	1	0	0	1	0	0	1	5	132.734	113.627	19.107
23	36	1	32.4886	1	0	0	1	0	0	1	6	135.031	113.518	21.513
23	36	1	32.4886	1	0	0	2	1	0	2	1	141.84	113.024	28.816
23	36	1	32.4886	1	0	0	2	1	0	2	2	140.534	115.101	25.433
23	36	1	32.4886	1	0	0	2	1	0	2	3	142.164	114.104	28.06
23	36	1	32.4886	1	0	0	2	1	0	2	4	142.229	113.824	28.405
23	36	1	32.4886	1	0	0	2	1	0	2	5	143.495	111.671	31.824
23	36	1	32.4886	1	0	0	2	1	0	2	6	143.676	112.227	31.449
23	36	1	32.4886	1	0	0	3	0	1	3	1	139.517	112.664	26.853
23	36	1	32.4886	1	0	0	3	0	1	3	2	148.496	113.094	35.402
23	36	1	32.4886	1	0	0	3	0	1	3	3	147.636	114.128	33.508
23	36	1	32.4886	1	0	0	3	0	1	3	4	146.1	113.099	33.001
23	36	1	32.4886	1	0	0	3	0	1	3	5	132.453	110.848	21.605
23	36	1	32.4886	1	0	0	3	0	1	3	6	149.288	114.324	34.964
23	36	1	32.4886	2	1	0	1	0	0	4	1	141.14	113.335	27.805
23	36	1	32.4886	2	1	0	1	0	0	4	2	141.438	115.187	26.251
23	36	1	32.4886	2	1	0	1	0	0	4	3	149.767	117.144	32.623
23	36	1	32.4886	2	1	0	1	0	0	4	4	150.351	117.352	32.999
23	36	1	32.4886	2	1	0	1	0	0	4	5	148.5	114.016	34.4839
23	36	1	32.4886	2	1	0	1	0	0	4	6	144.04	116.294	27.746
23	36	1	32.4886	2	1	0	2	1	0	5	1	145.227	115.203	30.024
23	36	1	32.4886	2	1	0	2	1	0	5	2	149.092	115.028	34.064
23	36	1	32.4886	2	1	0	2	1	0	5	3	147.389	113.815	33.574
23	36	1	32.4886	2	1	0	2	1	0	5	4	144.311	113.528	30.783
23	36	1	32.4886	2	1	0	2	1	0	5	5	147.127	113.77	33.357
23	36	1	32.4886	2	1	0	2	1	0	5	6	145.488	114.063	31.425
23	36	1	32.4886	2	1	0	3	0	1	6	1	141.884	114.106	27.778
23	36	1	32.4886	2	1	0	3	0	1	6	2	147.382	114.164	33.218
23	36	1	32.4886	2	1	0	3	0	1	6	3	142.102	113.573	28.529
23	36	1	32.4886	2	1	0	3	0	1	6	4	140.088	111.062	29.026
23	36	1	32.4886	2	1	0	3	0	1	6	5	143.808	112.635	31.173
23	36	1	32.4886	2	1	0	3	0	1	6	6	138.829	113.347	25.482
23	36	1	32.4886	3	0	1	1	0	0	7	1	121.186	106.154	15.032
23	36	1	32.4886	3	0	1	1	0	0	7	2	121.923	106.813	15.11
23	36	1	32.4886	3	0	1	1	0	0	7	3	123.14	105.439	17.701
23	36	1	32.4886	3	0	1	1	0	0	7	4	122.104	106.478	15.626
23	36	1	32.4886	3	0	1	1	0	0	7	5	129.2	108.235	20.965
23	36	1	32.4886	3	0	1	1	0	0	7	6	130.149	105.259	24.89
23	36	1	32.4886	3	0	1	2	1	0	8	1	130.062	107.442	22.62
23	36	1	32.4886	3	0	1	2	1	0	8	2	134.742	108.229	26.513
23	36	1	32.4886	3	0	1	2	1	0	8	3	132.074	105.91	26.164
23	36	1	32.4886	3	0	1	2	1	0	8	4	133.205	107.616	25.589
23	36	1	32.4886	3	0	1	2	1	0	8	5	131.116	107.704	23.412
23	36	1	32.4886	3	0	1	2	1	0	8	6	136.259	107.487	28.772
23	36	1	32.4886	3	0	1	3	0	1	9	1	130.022	109.62	20.402
23	36	1	32.4886	3	0	1	3	0	1	9	2	127.098	111.881	15.217
23	36	1	32.4886	3	0	1	3	0	1	9	3	135.369	111.981	23.388
23	36	1	32.4886	3	0	1	3	0	1	9	4	137.919	109.997	27.922
23	36	1	32.4886	3	0	1	3	0	1	9	5	135.303	111.524	23.779
23	36	1	32.4886	3	0	1	3	0	1	9	6	132.639	113.727	18.912
24	27	1	29.5092	1	0	0	1	0	0	1	1	135.631	105.508	30.123
24	27	1	29.5092	1	0	0	1	0	0	1	2	130.297	105.355	24.942
24	27	1	29.5092	1	0	0	1	0	0	1	3	133.564	107.068	26.496
24	27	1	29.5092	1	0	0	1	0	0	1	4	136.038	106.255	29.783
24	27	1	29.5092	1	0	0	1	0	0	1	5	131.753	104.512	27.241
24	27	1	29.5092	1	0	0	1	0	0	1	6	138.987	105.386	33.601
24	27	1	29.5092	1	0	0	2	1	0	2	1	124.381	102.67	21.711
24	27	1	29.5092	1	0	0	2	1	0	2	2	125.448	103.639	21.809
24	27	1	29.5092	1	0	0	2	1	0	2	3	129.133	105.103	24.03
24	27	1	29.5092	1	0	0	2	1	0	2	4	129.767	103.038	26.729
24	27	1	29.5092	1	0	0	2	1	0	2	5	124.777	104.209	20.568
24	27	1	29.5092	1	0	0	2	1	0	2	6	125.29	104.563	20.727
24	27	1	29.5092	1	0	0	3	0	1	3	1	130.897	104.272	26.625
24	27	1	29.5092	1	0	0	3	0	1	3	2	132.089	101.08	31.009
24	27	1	29.5092	1	0	0	3	0	1	3	3	130.061	98.277	31.784
24	27	1	29.5092	1	0	0	3	0	1	3	4	124.549	103.441	21.108
24	27	1	29.5092	1	0	0	3	0	1	3	5	132.829	102.499	30.33
24	27	1	29.5092	1	0	0	3	0	1	3	6	129.187	101.072	28.115
24	27	1	29.5092	2	1	0	1	0	0	4	1	136.932	108.518	28.414
24	27	1	29.5092	2	1	0	1	0	0	4	2	132.066	108.084	23.982
24	27	1	29.5092	2	1	0	1	0	0	4	3	138.345	107.587	30.758
24	27	1	29.5092	2	1	0	1	0	0	4	4	140	108.699	31.301
24	27	1	29.5092	2	1	0	1	0	0	4	5	136.577	108.232	28.345
24	27	1	29.5092	2	1	0	1	0	0	4	6	139	108.01	30.99
24	27	1	29.5092	2	1	0	2	1	0	5	1
24	27	1	29.5092	2	1	0	2	1	0	5	2
24	27	1	29.5092	2	1	0	2	1	0	5	3
24	27	1	29.5092	2	1	0	2	1	0	5	4
24	27	1	29.5092	2	1	0	2	1	0	5	5
24	27	1	29.5092	2	1	0	2	1	0	5	6
24	27	1	29.5092	2	1	0	3	0	1	6	1	127.664	100.125	27.539
24	27	1	29.5092	2	1	0	3	0	1	6	2	129.28	100.181	29.099
24	27	1	29.5092	2	1	0	3	0	1	6	3	133.789	99.444	34.345
24	27	1	29.5092	2	1	0	3	0	1	6	4	132.986	98.546	34.44
24	27	1	29.5092	2	1	0	3	0	1	6	5	127.585	99.31	28.275
24	27	1	29.5092	2	1	0	3	0	1	6	6	125.176	98.215	26.961
24	27	1	29.5092	3	0	1	1	0	0	7	1	120.95	93.493	27.457
24	27	1	29.5092	3	0	1	1	0	0	7	2	124.798	92.624	32.174
24	27	1	29.5092	3	0	1	1	0	0	7	3	123.105	93.409	29.696
24	27	1	29.5092	3	0	1	1	0	0	7	4	121.489	92.639	28.85
24	27	1	29.5092	3	0	1	1	0	0	7	5	121.754	92.886	28.868
24	27	1	29.5092	3	0	1	1	0	0	7	6	118.597	91.925	26.672
24	27	1	29.5092	3	0	1	2	1	0	8	1	127.793	101.241	26.552
24	27	1	29.5092	3	0	1	2	1	0	8	2	127.55	100.78	26.77
24	27	1	29.5092	3	0	1	2	1	0	8	3	126.152	101.395	24.757
24	27	1	29.5092	3	0	1	2	1	0	8	4	125.671	101.27	24.401
24	27	1	29.5092	3	0	1	2	1	0	8	5	120.087	103.15	16.937
24	27	1	29.5092	3	0	1	2	1	0	8	6	130.376	102.475	27.901
24	27	1	29.5092	3	0	1	3	0	1	9	1	125.775	102.341	23.434
24	27	1	29.5092	3	0	1	3	0	1	9	2	124.272	99.534	24.738
24	27	1	29.5092	3	0	1	3	0	1	9	3	124.47	100.875	23.595
24	27	1	29.5092	3	0	1	3	0	1	9	4	121.185	102.602	18.583
24	27	1	29.5092	3	0	1	3	0	1	9	5	127.757	101.725	26.032
24	27	1	29.5092	3	0	1	3	0	1	9	6	125.261	100.505	24.756
25	26	1	31.2394	1	0	0	1	0	0	1	1	120.529	105.082	15.447
25	26	1	31.2394	1	0	0	1	0	0	1	2	124.396	108.501	15.895
25	26	1	31.2394	1	0	0	1	0	0	1	3	125.608	105.947	19.661
25	26	1	31.2394	1	0	0	1	0	0	1	4	120.279	105.943	14.336
25	26	1	31.2394	1	0	0	1	0	0	1	5	125.397	108.377	17.02
25	26	1	31.2394	1	0	0	1	0	0	1	6	130.091	107.958	22.133
25	26	1	31.2394	1	0	0	2	1	0	2	1	132.877	110.402	22.475
25	26	1	31.2394	1	0	0	2	1	0	2	2	134.996	111.266	23.73
25	26	1	31.2394	1	0	0	2	1	0	2	3	129.758	110.488	19.27
25	26	1	31.2394	1	0	0	2	1	0	2	4	137.34	111.844	25.496
25	26	1	31.2394	1	0	0	2	1	0	2	5	135.401	110.275	25.126
25	26	1	31.2394	1	0	0	2	1	0	2	6	134.116	110.889	23.227
25	26	1	31.2394	1	0	0	3	0	1	3	1	136.336	102.941	33.395
25	26	1	31.2394	1	0	0	3	0	1	3	2	137.043	101.074	35.969
25	26	1	31.2394	1	0	0	3	0	1	3	3	132.417	102.749	29.668
25	26	1	31.2394	1	0	0	3	0	1	3	4	140.776	102.223	38.553
25	26	1	31.2394	1	0	0	3	0	1	3	5	136.901	103.682	33.219
25	26	1	31.2394	1	0	0	3	0	1	3	6	133.381	104.324	29.057
25	26	1	31.2394	2	1	0	1	0	0	4	1	129.808	107.735	22.073
25	26	1	31.2394	2	1	0	1	0	0	4	2	134.711	108.1	26.611
25	26	1	31.2394	2	1	0	1	0	0	4	3	130.105	105.596	24.509
25	26	1	31.2394	2	1	0	1	0	0	4	4	128.416	109.286	19.13
25	26	1	31.2394	2	1	0	1	0	0	4	5	128.803	110.485	18.318
25	26	1	31.2394	2	1	0	1	0	0	4	6	126.242	104.852	21.39
25	26	1	31.2394	2	1	0	2	1	0	5	1
25	26	1	31.2394	2	1	0	2	1	0	5	2
25	26	1	31.2394	2	1	0	2	1	0	5	3
25	26	1	31.2394	2	1	0	2	1	0	5	4
25	26	1	31.2394	2	1	0	2	1	0	5	5
25	26	1	31.2394	2	1	0	2	1	0	5	6
25	26	1	31.2394	2	1	0	3	0	1	6	1	126.991	104.291	22.7
25	26	1	31.2394	2	1	0	3	0	1	6	2	124.692	105.611	19.081
25	26	1	31.2394	2	1	0	3	0	1	6	3	124.269	103.53	20.739
25	26	1	31.2394	2	1	0	3	0	1	6	4	121.792	105.864	15.928
25	26	1	31.2394	2	1	0	3	0	1	6	5	131.922	106.335	25.587
25	26	1	31.2394	2	1	0	3	0	1	6	6	126.606	110.926	15.68
25	26	1	31.2394	3	0	1	1	0	0	7	1	120.496	105.296	15.2
25	26	1	31.2394	3	0	1	1	0	0	7	2	120.059	104.707	15.352
25	26	1	31.2394	3	0	1	1	0	0	7	3	121.699	105.075	16.624
25	26	1	31.2394	3	0	1	1	0	0	7	4	119.622	104.718	14.904
25	26	1	31.2394	3	0	1	1	0	0	7	5	119.53	106.114	13.416
25	26	1	31.2394	3	0	1	1	0	0	7	6	121.588	103.761	17.827
25	26	1	31.2394	3	0	1	2	1	0	8	1	125.782	103.666	22.116
25	26	1	31.2394	3	0	1	2	1	0	8	2	120.453	104.073	16.38
25	26	1	31.2394	3	0	1	2	1	0	8	3	121.062	103.069	17.993
25	26	1	31.2394	3	0	1	2	1	0	8	4	119.889	103.262	16.627
25	26	1	31.2394	3	0	1	2	1	0	8	5	119.263	106.044	13.219
25	26	1	31.2394	3	0	1	2	1	0	8	6	124.633	105.041	19.592
25	26	1	31.2394	3	0	1	3	0	1	9	1	129.726	109.405	20.321
25	26	1	31.2394	3	0	1	3	0	1	9	2	128.022	111.269	16.753
25	26	1	31.2394	3	0	1	3	0	1	9	3	130.658	109.366	21.292
25	26	1	31.2394	3	0	1	3	0	1	9	4	128.86	109.84	19.02
25	26	1	31.2394	3	0	1	3	0	1	9	5	127.744	111.408	16.336
25	26	1	31.2394	3	0	1	3	0	1	9	6	130.702	109.108	21.594
26	55	1	37.2615	1	0	0	1	0	0	1	1	126.918	102.994	23.924
26	55	1	37.2615	1	0	0	1	0	0	1	2	119.562	102.536	17.026
26	55	1	37.2615	1	0	0	1	0	0	1	3	120.202	102.472	17.73
26	55	1	37.2615	1	0	0	1	0	0	1	4	120.285	102.967	17.318
26	55	1	37.2615	1	0	0	1	0	0	1	5	123.207	102.214	20.993
26	55	1	37.2615	1	0	0	1	0	0	1	6	121.537	100.534	21.003
26	55	1	37.2615	1	0	0	2	1	0	2	1	117.309	104.874	12.435
26	55	1	37.2615	1	0	0	2	1	0	2	2	116.69	104.022	12.668
26	55	1	37.2615	1	0	0	2	1	0	2	3	115.256	106.63	8.626
26	55	1	37.2615	1	0	0	2	1	0	2	4	121.587	105.452	16.135
26	55	1	37.2615	1	0	0	2	1	0	2	5	116.045	107.672	8.373
26	55	1	37.2615	1	0	0	2	1	0	2	6	118.933	103.927	15.006
26	55	1	37.2615	1	0	0	3	0	1	3	1	134.577	113.845	20.732
26	55	1	37.2615	1	0	0	3	0	1	3	2	134.376	115.372	19.004
26	55	1	37.2615	1	0	0	3	0	1	3	3	137.512	114.697	22.815
26	55	1	37.2615	1	0	0	3	0	1	3	4	135.326	115.083	20.243
26	55	1	37.2615	1	0	0	3	0	1	3	5	134.64	114.75	19.89
26	55	1	37.2615	1	0	0	3	0	1	3	6	131.978	113.104	18.874
26	55	1	37.2615	2	1	0	1	0	0	4	1	138.949	113.471	25.478
26	55	1	37.2615	2	1	0	1	0	0	4	2	139.335	111.012	28.323
26	55	1	37.2615	2	1	0	1	0	0	4	3	133.977	111.941	22.036
26	55	1	37.2615	2	1	0	1	0	0	4	4	139.737	110.378	29.359
26	55	1	37.2615	2	1	0	1	0	0	4	5	138.197	110.041	28.156
26	55	1	37.2615	2	1	0	1	0	0	4	6	136.254	110.381	25.873
26	55	1	37.2615	2	1	0	2	1	0	5	1
26	55	1	37.2615	2	1	0	2	1	0	5	2
26	55	1	37.2615	2	1	0	2	1	0	5	3
26	55	1	37.2615	2	1	0	2	1	0	5	4
26	55	1	37.2615	2	1	0	2	1	0	5	5
26	55	1	37.2615	2	1	0	2	1	0	5	6
26	55	1	37.2615	2	1	0	3	0	1	6	1	137.948	108.614	29.334
26	55	1	37.2615	2	1	0	3	0	1	6	2	134.744	110.211	24.533
26	55	1	37.2615	2	1	0	3	0	1	6	3	134.81	107.679	27.131
26	55	1	37.2615	2	1	0	3	0	1	6	4	134.801	108.61	26.191
26	55	1	37.2615	2	1	0	3	0	1	6	5	131.957	108.249	23.708
26	55	1	37.2615	2	1	0	3	0	1	6	6	138.019	108.683	29.336
26	55	1	37.2615	3	0	1	1	0	0	7	1	113.687	94.33	19.357
26	55	1	37.2615	3	0	1	1	0	0	7	2	111.766	93.032	18.734
26	55	1	37.2615	3	0	1	1	0	0	7	3	115.082	94.43	20.652
26	55	1	37.2615	3	0	1	1	0	0	7	4	115.064	91.913	23.151
26	55	1	37.2615	3	0	1	1	0	0	7	5	113.363	93.78	19.583
26	55	1	37.2615	3	0	1	1	0	0	7	6	115.159	92.297	22.862
26	55	1	37.2615	3	0	1	2	1	0	8	1	124.402	106.314	18.088
26	55	1	37.2615	3	0	1	2	1	0	8	2	126.315	110.18	16.135
26	55	1	37.2615	3	0	1	2	1	0	8	3	131.004	108.235	22.769
26	55	1	37.2615	3	0	1	2	1	0	8	4	129.39	109.372	20.018
26	55	1	37.2615	3	0	1	2	1	0	8	5	132.11	107.112	24.998
26	55	1	37.2615	3	0	1	2	1	0	8	6	126.603	107.399	19.204
26	55	1	37.2615	3	0	1	3	0	1	9	1	129.728	109.403	20.325
26	55	1	37.2615	3	0	1	3	0	1	9	2	127.77	111.268	16.502
26	55	1	37.2615	3	0	1	3	0	1	9	3	130.666	109.375	21.291
26	55	1	37.2615	3	0	1	3	0	1	9	4	128.862	109.848	19.014
26	55	1	37.2615	3	0	1	3	0	1	9	5	127.749	111.415	16.334
26	55	1	37.2615	3	0	1	3	0	1	9	6	130.702	109.114	21.588
27	22	1	22.244	1	0	0	1	0	0	1	1	114.592	100.785	13.807
27	22	1	22.244	1	0	0	1	0	0	1	2	117.846	101.808	16.038
27	22	1	22.244	1	0	0	1	0	0	1	3	117.648	100.304	17.344
27	22	1	22.244	1	0	0	1	0	0	1	4	120.669	99.277	21.392
27	22	1	22.244	1	0	0	1	0	0	1	5	117.647	97.836	19.811
27	22	1	22.244	1	0	0	1	0	0	1	6	121.948	98.318	23.63
27	22	1	22.244	1	0	0	2	1	0	2	1	126.105	99.336	26.769
27	22	1	22.244	1	0	0	2	1	0	2	2	120.355	102.919	17.436
27	22	1	22.244	1	0	0	2	1	0	2	3	123.43	101.621	21.809
27	22	1	22.244	1	0	0	2	1	0	2	4	124.769	100.433	24.336
27	22	1	22.244	1	0	0	2	1	0	2	5	122.06	96.84	25.22
27	22	1	22.244	1	0	0	2	1	0	2	6	125.863	99.002	26.861
27	22	1	22.244	1	0	0	3	0	1	3	1	112.893	92.24	20.653
27	22	1	22.244	1	0	0	3	0	1	3	2	113.865	92.27	21.595
27	22	1	22.244	1	0	0	3	0	1	3	3	115.223	91.873	23.35
27	22	1	22.244	1	0	0	3	0	1	3	4	125.865	91.069	34.796
27	22	1	22.244	1	0	0	3	0	1	3	5	117.939	90.822	27.117
27	22	1	22.244	1	0	0	3	0	1	3	6	117.051	93.023	24.028
27	22	1	22.244	2	1	0	1	0	0	4	1	134.331	110.219	24.112
27	22	1	22.244	2	1	0	1	0	0	4	2	135.979	108.311	27.668
27	22	1	22.244	2	1	0	1	0	0	4	3	130.235	109.53	20.705
27	22	1	22.244	2	1	0	1	0	0	4	4	131.344	108.987	22.357
27	22	1	22.244	2	1	0	1	0	0	4	5	131.344	107.672	23.672
27	22	1	22.244	2	1	0	1	0	0	4	6	129.574	107.992	21.582
27	22	1	22.244	2	1	0	2	1	0	5	1	132.499	106.765	25.734
27	22	1	22.244	2	1	0	2	1	0	5	2	131.753	106.795	24.958
27	22	1	22.244	2	1	0	2	1	0	5	3	131.752	106.728	25.024
27	22	1	22.244	2	1	0	2	1	0	5	4	131.827	105.66	26.167
27	22	1	22.244	2	1	0	2	1	0	5	5	133.169	106.552	26.617
27	22	1	22.244	2	1	0	2	1	0	5	6	133.208	108.279	24.929
27	22	1	22.244	2	1	0	3	0	1	6	1	127.914	101.62	26.294
27	22	1	22.244	2	1	0	3	0	1	6	2	128.289	100.323	27.966
27	22	1	22.244	2	1	0	3	0	1	6	3	129.571	98.924	30.647
27	22	1	22.244	2	1	0	3	0	1	6	4	128.326	100.24	28.086
27	22	1	22.244	2	1	0	3	0	1	6	5	129.903	103.348	26.555
27	22	1	22.244	2	1	0	3	0	1	6	6	127.959	101.678	26.281
27	22	1	22.244	3	0	1	1	0	0	7	1	113.261	91.384	21.877
27	22	1	22.244	3	0	1	1	0	0	7	2	113.252	90.304	22.948
27	22	1	22.244	3	0	1	1	0	0	7	3	112.675	91.419	21.256
27	22	1	22.244	3	0	1	1	0	0	7	4	110.114	91.432	18.682
27	22	1	22.244	3	0	1	1	0	0	7	5	111.272	90.282	20.99
27	22	1	22.244	3	0	1	1	0	0	7	6	110.557	90.134	20.423
27	22	1	22.244	3	0	1	2	1	0	8	1	133.378	110.037	23.341
27	22	1	22.244	3	0	1	2	1	0	8	2	133.599	110.376	23.223
27	22	1	22.244	3	0	1	2	1	0	8	3	136.006	109.554	26.452
27	22	1	22.244	3	0	1	2	1	0	8	4	135.109	106.894	28.215
27	22	1	22.244	3	0	1	2	1	0	8	5	132.166	107.007	25.159
27	22	1	22.244	3	0	1	2	1	0	8	6	133.031	107.183	25.848
27	22	1	22.244	3	0	1	3	0	1	9	1	132.226	106.133	26.093
27	22	1	22.244	3	0	1	3	0	1	9	2	130.967	106.016	24.951
27	22	1	22.244	3	0	1	3	0	1	9	3	127.521	104.454	23.067
27	22	1	22.244	3	0	1	3	0	1	9	4	124.657	104.672	19.985
27	22	1	22.244	3	0	1	3	0	1	9	5	127.625	108.368	19.257
27	22	1	22.244	3	0	1	3	0	1	9	6	129.087	104.9	24.187
28	44	1	24.9649	1	0	0	1	0	0	1	1	124.926	108.812	16.114
28	44	1	24.9649	1	0	0	1	0	0	1	2	124.318	107.905	16.413
28	44	1	24.9649	1	0	0	1	0	0	1	3	126.637	107.231	19.406
28	44	1	24.9649	1	0	0	1	0	0	1	4	125.93	107.491	18.439
28	44	1	24.9649	1	0	0	1	0	0	1	5	125.262	97.048	28.214
28	44	1	24.9649	1	0	0	1	0	0	1	6	130.275	108.401	21.874
28	44	1	24.9649	1	0	0	2	1	0	2	1	125.051	108.375	16.676
28	44	1	24.9649	1	0	0	2	1	0	2	2	123.826	108.486	15.34
28	44	1	24.9649	1	0	0	2	1	0	2	3	124.566	108.619	15.947
28	44	1	24.9649	1	0	0	2	1	0	2	4	124.346	110.164	14.182
28	44	1	24.9649	1	0	0	2	1	0	2	5	127.944	106.91	21.034
28	44	1	24.9649	1	0	0	2	1	0	2	6	121.37	107.239	14.131
28	44	1	24.9649	1	0	0	3	0	1	3	1	129.249	112.115	17.134
28	44	1	24.9649	1	0	0	3	0	1	3	2	129.877	113.382	16.495
28	44	1	24.9649	1	0	0	3	0	1	3	3	130.997	115.177	15.82
28	44	1	24.9649	1	0	0	3	0	1	3	4	131.172	112.509	18.663
28	44	1	24.9649	1	0	0	3	0	1	3	5	130.008	112.239	17.769
28	44	1	24.9649	1	0	0	3	0	1	3	6	129.75	114.768	14.982
28	44	1	24.9649	2	1	0	1	0	0	4	1	121.202	104.837	16.365
28	44	1	24.9649	2	1	0	1	0	0	4	2	123.889	102.474	21.415
28	44	1	24.9649	2	1	0	1	0	0	4	3	120.964	104.336	16.628
28	44	1	24.9649	2	1	0	1	0	0	4	4	119.396	103.013	16.383
28	44	1	24.9649	2	1	0	1	0	0	4	5	122.853	102.548	20.305
28	44	1	24.9649	2	1	0	1	0	0	4	6	121.078	103.104	17.974
28	44	1	24.9649	2	1	0	2	1	0	5	1	122.526	107.26	15.266
28	44	1	24.9649	2	1	0	2	1	0	5	2	121.888	107.696	14.192
28	44	1	24.9649	2	1	0	2	1	0	5	3	124.605	105.973	18.632
28	44	1	24.9649	2	1	0	2	1	0	5	4	124.196	106.202	17.994
28	44	1	24.9649	2	1	0	2	1	0	5	5	123.963	105.417	18.546
28	44	1	24.9649	2	1	0	2	1	0	5	6	121.346	104.969	16.377
28	44	1	24.9649	2	1	0	3	0	1	6	1	129.428	105.554	23.874
28	44	1	24.9649	2	1	0	3	0	1	6	2	127.612	106.146	21.466
28	44	1	24.9649	2	1	0	3	0	1	6	3	129.649	106.039	23.61
28	44	1	24.9649	2	1	0	3	0	1	6	4	127.646	103.915	23.731
28	44	1	24.9649	2	1	0	3	0	1	6	5	127.109	105.723	21.386
28	44	1	24.9649	2	1	0	3	0	1	6	6	125.199	107.625	17.574
28	44	1	24.9649	3	0	1	1	0	0	7	1	120.963	108.836	12.127
28	44	1	24.9649	3	0	1	1	0	0	7	2	122.572	106.744	15.828
28	44	1	24.9649	3	0	1	1	0	0	7	3	118.798	105.81	12.988
28	44	1	24.9649	3	0	1	1	0	0	7	4	118.029	107.286	10.743
28	44	1	24.9649	3	0	1	1	0	0	7	5	117.666	105.552	12.114
28	44	1	24.9649	3	0	1	1	0	0	7	6	117.822	106.884	10.938
28	44	1	24.9649	3	0	1	2	1	0	8	1	114.567	99.359	15.208
28	44	1	24.9649	3	0	1	2	1	0	8	2	117.426	99.427	17.999
28	44	1	24.9649	3	0	1	2	1	0	8	3	116.25	98.331	17.919
28	44	1	24.9649	3	0	1	2	1	0	8	4	115.77	98.233	17.537
28	44	1	24.9649	3	0	1	2	1	0	8	5	117.108	98.053	19.055
28	44	1	24.9649	3	0	1	2	1	0	8	6	116.504	97.8	18.704
28	44	1	24.9649	3	0	1	3	0	1	9	1	123.599	105.956	17.643
28	44	1	24.9649	3	0	1	3	0	1	9	2	122.684	105.811	16.873
28	44	1	24.9649	3	0	1	3	0	1	9	3	122.596	105.257	17.339
28	44	1	24.9649	3	0	1	3	0	1	9	4	123.864	105.944	17.92
28	44	1	24.9649	3	0	1	3	0	1	9	5	122.348	103.56	18.788
28	44	1	24.9649	3	0	1	3	0	1	9	6	119.732	104.543	15.189
29	24	1	23.7387	1	0	0	1	0	0	1	1	126.824	104.291	22.533
29	24	1	23.7387	1	0	0	1	0	0	1	2	124.299	105.149	19.15
29	24	1	23.7387	1	0	0	1	0	0	1	3	125.532	104.119	21.413
29	24	1	23.7387	1	0	0	1	0	0	1	4	128.443	103.252	25.191
29	24	1	23.7387	1	0	0	1	0	0	1	5	126.679	105.486	21.193
29	24	1	23.7387	1	0	0	1	0	0	1	6	131.485	106.649	24.836
29	24	1	23.7387	1	0	0	2	1	0	2	1	121.281	103.608	17.673
29	24	1	23.7387	1	0	0	2	1	0	2	2	122.935	101.239	21.696
29	24	1	23.7387	1	0	0	2	1	0	2	3	121.302	102.364	18.938
29	24	1	23.7387	1	0	0	2	1	0	2	4	124.583	102.558	22.025
29	24	1	23.7387	1	0	0	2	1	0	2	5	123.534	103.112	20.422
29	24	1	23.7387	1	0	0	2	1	0	2	6	124.621	103.23	21.391
29	24	1	23.7387	1	0	0	3	0	1	3	1	123.02	97.151	25.869
29	24	1	23.7387	1	0	0	3	0	1	3	2	124.012	95.804	28.208
29	24	1	23.7387	1	0	0	3	0	1	3	3	119.512	98.147	21.365
29	24	1	23.7387	1	0	0	3	0	1	3	4	122.037	97.951	24.086
29	24	1	23.7387	1	0	0	3	0	1	3	5	125.124	98.125	26.999
29	24	1	23.7387	1	0	0	3	0	1	3	6
29	24	1	23.7387	2	1	0	1	0	0	4	1	133.772	104.611	29.161
29	24	1	23.7387	2	1	0	1	0	0	4	2	134.353	104.598	29.755
29	24	1	23.7387	2	1	0	1	0	0	4	3	133.114	101.308	31.806
29	24	1	23.7387	2	1	0	1	0	0	4	4	131.914	104.51	27.404
29	24	1	23.7387	2	1	0	1	0	0	4	5	132.389	101.88	30.509
29	24	1	23.7387	2	1	0	1	0	0	4	6	133.631	102.962	30.669
29	24	1	23.7387	2	1	0	2	1	0	5	1
29	24	1	23.7387	2	1	0	2	1	0	5	2
29	24	1	23.7387	2	1	0	2	1	0	5	3
29	24	1	23.7387	2	1	0	2	1	0	5	4
29	24	1	23.7387	2	1	0	2	1	0	5	5
29	24	1	23.7387	2	1	0	2	1	0	5	6
29	24	1	23.7387	2	1	0	3	0	1	6	1	129.864	97.98	31.884
29	24	1	23.7387	2	1	0	3	0	1	6	2	128.877	99.338	29.539
29	24	1	23.7387	2	1	0	3	0	1	6	3	128.487	98.874	29.613
29	24	1	23.7387	2	1	0	3	0	1	6	4	129.14	99.912	29.228
29	24	1	23.7387	2	1	0	3	0	1	6	5	126.039	98.017	28.022
29	24	1	23.7387	2	1	0	3	0	1	6	6	127.387	98.263	29.124
29	24	1	23.7387	3	0	1	1	0	0	7	1	136.003	105.825	30.178
29	24	1	23.7387	3	0	1	1	0	0	7	2	135.733	107.062	28.671
29	24	1	23.7387	3	0	1	1	0	0	7	3	136.031	105.042	30.989
29	24	1	23.7387	3	0	1	1	0	0	7	4	138.206	104.874	33.332
29	24	1	23.7387	3	0	1	1	0	0	7	5	137.565	105.673	31.892
29	24	1	23.7387	3	0	1	1	0	0	7	6	137.017	105.673	31.344
29	24	1	23.7387	3	0	1	2	1	0	8	1	129.926	108.104	21.822
29	24	1	23.7387	3	0	1	2	1	0	8	2	126.188	106.424	19.764
29	24	1	23.7387	3	0	1	2	1	0	8	3	123.162	107.291	15.871
29	24	1	23.7387	3	0	1	2	1	0	8	4	127.097	105.972	21.125
29	24	1	23.7387	3	0	1	2	1	0	8	5	126.937	106.903	20.034
29	24	1	23.7387	3	0	1	2	1	0	8	6	128.367	106.305	22.062
29	24	1	23.7387	3	0	1	3	0	1	9	1	124.495	105.355	19.14
29	24	1	23.7387	3	0	1	3	0	1	9	2	122.716	107.896	14.82
29	24	1	23.7387	3	0	1	3	0	1	9	3	128.423	104.824	23.599
29	24	1	23.7387	3	0	1	3	0	1	9	4	119.255	103.697	15.558
29	24	1	23.7387	3	0	1	3	0	1	9	5	123.369	105.679	17.69
29	24	1	23.7387	3	0	1	3	0	1	9	6	124.162	106.984	17.178
30	32	1	27.7344	1	0	0	1	0	0	1	1	133.68	110.675	23.005
30	32	1	27.7344	1	0	0	1	0	0	1	2	134.478	107.525	26.953
30	32	1	27.7344	1	0	0	1	0	0	1	3	130.473	109.81	20.663
30	32	1	27.7344	1	0	0	1	0	0	1	4	126.945	110.894	16.051
30	32	1	27.7344	1	0	0	1	0	0	1	5	132.456	108.982	23.474
30	32	1	27.7344	1	0	0	1	0	0	1	6	133.619	110.011	23.608
30	32	1	27.7344	1	0	0	2	1	0	2	1	127.789	116.61	11.179
30	32	1	27.7344	1	0	0	2	1	0	2	2	127.704	119.11	8.594
30	32	1	27.7344	1	0	0	2	1	0	2	3	129.01	118.659	10.351
30	32	1	27.7344	1	0	0	2	1	0	2	4	131.207	116.612	14.595
30	32	1	27.7344	1	0	0	2	1	0	2	5	127.23	118.038	9.192
30	32	1	27.7344	1	0	0	2	1	0	2	6	130.136	117.372	12.764
30	32	1	27.7344	1	0	0	3	0	1	3	1	120.528	98.735	21.793
30	32	1	27.7344	1	0	0	3	0	1	3	2	118.011	97.737	20.274
30	32	1	27.7344	1	0	0	3	0	1	3	3	116.704	100.109	16.595
30	32	1	27.7344	1	0	0	3	0	1	3	4	119.056	98.193	20.863
30	32	1	27.7344	1	0	0	3	0	1	3	5	116.634	101.859	14.775
30	32	1	27.7344	1	0	0	3	0	1	3	6	122.993	99.16	23.833
30	32	1	27.7344	2	1	0	1	0	0	4	1	128.097	109.61	18.487
30	32	1	27.7344	2	1	0	1	0	0	4	2	133.632	108.744	24.888
30	32	1	27.7344	2	1	0	1	0	0	4	3	138.107	109.968	28.139
30	32	1	27.7344	2	1	0	1	0	0	4	4	133.514	109.034	24.48
30	32	1	27.7344	2	1	0	1	0	0	4	5	133.132	108.525	24.607
30	32	1	27.7344	2	1	0	1	0	0	4	6	138.668	108.76	29.908
30	32	1	27.7344	2	1	0	2	1	0	5	1	111.331	100.087	11.244
30	32	1	27.7344	2	1	0	2	1	0	5	2	114.991	97.991	17
30	32	1	27.7344	2	1	0	2	1	0	5	3	114.385	99.226	15.159
30	32	1	27.7344	2	1	0	2	1	0	5	4	114.448	99.048	15.4
30	32	1	27.7344	2	1	0	2	1	0	5	5	115.486	99.346	16.14
30	32	1	27.7344	2	1	0	2	1	0	5	6	115.073	98.984	16.089
30	32	1	27.7344	2	1	0	3	0	1	6	1	116.068	95.957	20.111
30	32	1	27.7344	2	1	0	3	0	1	6	2	118.663	95.958	22.705
30	32	1	27.7344	2	1	0	3	0	1	6	3	116.412	97.227	19.185
30	32	1	27.7344	2	1	0	3	0	1	6	4	122.213	96.141	26.072
30	32	1	27.7344	2	1	0	3	0	1	6	5	117.577	97.588	19.989
30	32	1	27.7344	2	1	0	3	0	1	6	6	117.96	96.207	21.753
30	32	1	27.7344	3	0	1	1	0	0	7	1	121.058	101.923	19.135
30	32	1	27.7344	3	0	1	1	0	0	7	2	121.374	103.044	18.33
30	32	1	27.7344	3	0	1	1	0	0	7	3	133.897	102.443	31.454
30	32	1	27.7344	3	0	1	1	0	0	7	4	122.92	101.304	21.616
30	32	1	27.7344	3	0	1	1	0	0	7	5	122.052	102.73	19.322
30	32	1	27.7344	3	0	1	1	0	0	7	6	122.92	100.936	21.984
30	32	1	27.7344	3	0	1	2	1	0	8	1	127.838	115.868	11.97
30	32	1	27.7344	3	0	1	2	1	0	8	2	128.342	115.562	12.78
30	32	1	27.7344	3	0	1	2	1	0	8	3	127.144	115.95	11.194
30	32	1	27.7344	3	0	1	2	1	0	8	4	127.073	116.47	10.603
30	32	1	27.7344	3	0	1	2	1	0	8	5	125.742	115.138	10.604
30	32	1	27.7344	3	0	1	2	1	0	8	6	125.099	117.143	7.956
30	32	1	27.7344	3	0	1	3	0	1	9	1	124.495	105.355	19.14
30	32	1	27.7344	3	0	1	3	0	1	9	2	122.716	108.015	14.701
30	32	1	27.7344	3	0	1	3	0	1	9	3	128.862	105.664	23.198
30	32	1	27.7344	3	0	1	3	0	1	9	4	119.755	103.697	16.058
30	32	1	27.7344	3	0	1	3	0	1	9	5	123.369	105.609	17.76
30	32	1	27.7344	3	0	1	3	0	1	9	6	124.162	106.984	17.178

## Sheet: Sheet1
Participant	Age	Gender	BMI	Footwear condition	Typical footwear	Medical footwear	Garment Condition	Bandaging	Hosiery	Step	Maximum	Minimum	Range
1	31	1	22.4675	1	0	0	1	0	0	1	138.468	103.617	34.851	157.642	133.279	50.826
1	31	1	22.4675	1	0	0	1	0	0	2	138.94	103.485	35.455	106.77	85.886	0.187
1	31	1	22.4675	1	0	0	1	0	0	3	140.252	102.661	37.591	130.087	105.569	24.5225
1	31	1	22.4675	1	0	0	1	0	0	4	139.371	105.001	34.37	7.54989	5.80695	6.65338
1	31	1	22.4675	1	0	0	1	0	0	5	136.241	101.679	34.562
1	31	1	22.4675	1	0	0	1	0	0	6	138.409	103.788	34.621
1	31	1	22.4675	1	0	0	2	1	0	1	129.168	103.657	25.511
1	31	1	22.4675	1	0	0	2	1	0	2	128.043	104.064	23.979
1	31	1	22.4675	1	0	0	2	1	0	3	129.81	101.039	28.771
1	31	1	22.4675	1	0	0	2	1	0	4	129.06	104.726	24.334
1	31	1	22.4675	1	0	0	2	1	0	5	130.286	104.094	26.192
1	31	1	22.4675	1	0	0	2	1	0	6	127.153	103.44	23.713
1	31	1	22.4675	1	0	0	3	0	1	1	132.55	100.831	31.719
1	31	1	22.4675	1	0	0	3	0	1	2	130.021	99.407	30.614
1	31	1	22.4675	1	0	0	3	0	1	3	130.131	101.576	28.555
1	31	1	22.4675	1	0	0	3	0	1	4	135.161	97.997	37.164
1	31	1	22.4675	1	0	0	3	0	1	5	133.376	103.135	30.241
1	31	1	22.4675	1	0	0	3	0	1	6	134.528	100.944	33.584
1	31	1	22.4675	2	1	0	1	0	0	1	134.637	101.71	32.927
1	31	1	22.4675	2	1	0	1	0	0	2	135.38	100.545	34.835
1	31	1	22.4675	2	1	0	1	0	0	3	130.072	101.722	28.35
1	31	1	22.4675	2	1	0	1	0	0	4	137.063	100.208	36.855
1	31	1	22.4675	2	1	0	1	0	0	5	134.696	101.688	33.008
1	31	1	22.4675	2	1	0	1	0	0	6	135.475	101.961	33.514
1	31	1	22.4675	2	1	0	2	1	0	1	131.698	102.187	29.511
1	31	1	22.4675	2	1	0	2	1	0	2	124.471	102.378	22.093
1	31	1	22.4675	2	1	0	2	1	0	3	128.141	101.365	26.776
1	31	1	22.4675	2	1	0	2	1	0	4	130.981	101.458	29.523
1	31	1	22.4675	2	1	0	2	1	0	5	128.398	100.59	27.808
1	31	1	22.4675	2	1	0	2	1	0	6	131.109	99.415	31.694
1	31	1	22.4675	2	1	0	3	0	1	1	130.098	102.161	27.937
1	31	1	22.4675	2	1	0	3	0	1	2	133.871	101.235	32.636
1	31	1	22.4675	2	1	0	3	0	1	3	131.544	99.801	31.743
1	31	1	22.4675	2	1	0	3	0	1	4	131.795	99.765	32.03
1	31	1	22.4675	2	1	0	3	0	1	5	133.158	103.028	30.13
1	31	1	22.4675	2	1	0	3	0	1	6	133.667	99.755	33.912
1	31	1	22.4675	3	0	1	1	0	0	1	136.244	98.789	37.455
1	31	1	22.4675	3	0	1	1	0	0	2	135.46	100.369	35.091
1	31	1	22.4675	3	0	1	1	0	0	3	138.078	101.902	36.176
1	31	1	22.4675	3	0	1	1	0	0	4	134.798	101.754	33.044
1	31	1	22.4675	3	0	1	1	0	0	5	135.942	99.764	36.178
1	31	1	22.4675	3	0	1	1	0	0	6	134.292	101.363	32.929
1	31	1	22.4675	3	0	1	2	1	0	1	132.208	106.644	25.564
1	31	1	22.4675	3	0	1	2	1	0	2	130.344	108.58	21.764
1	31	1	22.4675	3	0	1	2	1	0	3	132.875	108.778	24.097
1	31	1	22.4675	3	0	1	2	1	0	4	134.189	105.662	28.527
1	31	1	22.4675	3	0	1	2	1	0	5	126.037	108.464	17.573
1	31	1	22.4675	3	0	1	2	1	0	6	134.29	108.98	25.31
1	31	1	22.4675	3	0	1	3	0	1	1	126.971	99.488	27.483
1	31	1	22.4675	3	0	1	3	0	1	2	128.453	98.467	29.986
1	31	1	22.4675	3	0	1	3	0	1	3	129.095	98.078	31.017
1	31	1	22.4675	3	0	1	3	0	1	4	129.219	99.552	29.667
1	31	1	22.4675	3	0	1	3	0	1	5	129.552	98.994	30.558
1	31	1	22.4675	3	0	1	3	0	1	6	131.053	98.797	32.256
2	39	1	32.3437	1	0	0	1	0	0	1	152.482	105.611	46.871
2	39	1	32.3437	1	0	0	1	0	0	2	152.18	107.775	44.405
2	39	1	32.3437	1	0	0	1	0	0	3	153.079	107.923	45.156
2	39	1	32.3437	1	0	0	1	0	0	4	155.279	107.073	48.206
2	39	1	32.3437	1	0	0	1	0	0	5	157.642	106.816	50.826
2	39	1	32.3437	1	0	0	1	0	0	6	155.093	104.985	50.108
2	39	1	32.3437	1	0	0	2	1	0	1	137.379	102.354	35.025
2	39	1	32.3437	1	0	0	2	1	0	2	136.345	102.581	33.764
2	39	1	32.3437	1	0	0	2	1	0	3	137.082	101.972	35.11
2	39	1	32.3437	1	0	0	2	1	0	4	137.224	102.512	34.712
2	39	1	32.3437	1	0	0	2	1	0	5	136.378	103.1	33.278
2	39	1	32.3437	1	0	0	2	1	0	6	134.887	101.869	33.018
2	39	1	32.3437	1	0	0	3	0	1	1	145.048	107.404	37.644
2	39	1	32.3437	1	0	0	3	0	1	2	149.811	107.35	42.461
2	39	1	32.3437	1	0	0	3	0	1	3	152.238	108.128	44.11
2	39	1	32.3437	1	0	0	3	0	1	4	149.747	106.432	43.315
2	39	1	32.3437	1	0	0	3	0	1	5	149.129	108.497	40.632
2	39	1	32.3437	1	0	0	3	0	1	6	146.635	106.217	40.418
2	39	1	32.3437	2	1	0	1	0	0	1	150.654	106.282	44.372
2	39	1	32.3437	2	1	0	1	0	0	2	148.575	105.344	43.231
2	39	1	32.3437	2	1	0	1	0	0	3	148.479	107.238	41.241
2	39	1	32.3437	2	1	0	1	0	0	4	148.206	106.31	41.896
2	39	1	32.3437	2	1	0	1	0	0	5	145.741	105.321	40.42
2	39	1	32.3437	2	1	0	1	0	0	6	146.064	107.521	38.543
2	39	1	32.3437	2	1	0	2	1	0	1
2	39	1	32.3437	2	1	0	2	1	0	2
2	39	1	32.3437	2	1	0	2	1	0	3
2	39	1	32.3437	2	1	0	2	1	0	4
2	39	1	32.3437	2	1	0	2	1	0	5
2	39	1	32.3437	2	1	0	2	1	0	6
2	39	1	32.3437	2	1	0	3	0	1	1	148.091	104.998	43.093
2	39	1	32.3437	2	1	0	3	0	1	2	144.123	102.305	41.818
2	39	1	32.3437	2	1	0	3	0	1	3	141.136	103.845	37.291
2	39	1	32.3437	2	1	0	3	0	1	4	140.14	103.331	36.809
2	39	1	32.3437	2	1	0	3	0	1	5	139.47	102.804	36.666
2	39	1	32.3437	2	1	0	3	0	1	6	137.731	102.743	34.988
2	39	1	32.3437	3	0	1	1	0	0	1	142.863	104.788	38.075
2	39	1	32.3437	3	0	1	1	0	0	2	142.221	105.78	36.441
2	39	1	32.3437	3	0	1	1	0	0	3	143.151	105.864	37.287
2	39	1	32.3437	3	0	1	1	0	0	4	140.393	104.129	36.264
2	39	1	32.3437	3	0	1	1	0	0	5	137.375	104.486	32.889
2	39	1	32.3437	3	0	1	1	0	0	6	137.987	104.994	32.993
2	39	1	32.3437	3	0	1	2	1	0	1	125.514	103.473	22.041
2	39	1	32.3437	3	0	1	2	1	0	2	127.026	102.293	24.733
2	39	1	32.3437	3	0	1	2	1	0	3	127.98	102.733	25.247
2	39	1	32.3437	3	0	1	2	1	0	4	127.992	104.526	23.466
2	39	1	32.3437	3	0	1	2	1	0	5	130.403	100.906	29.497
2	39	1	32.3437	3	0	1	2	1	0	6	128.218	104.956	23.262
2	39	1	32.3437	3	0	1	3	0	1	1	139.618	111.271	28.347
2	39	1	32.3437	3	0	1	3	0	1	2	141.13	110.8	30.33
2	39	1	32.3437	3	0	1	3	0	1	3	138.725	112.049	26.676
2	39	1	32.3437	3	0	1	3	0	1	4	137.464	112.591	24.873
2	39	1	32.3437	3	0	1	3	0	1	5	135.528	113.301	22.227
2	39	1	32.3437	3	0	1	3	0	1	6	138.176	111.135	27.041
3	56	1	21.1927	1	0	0	1	0	0	1	116.966	99.657	17.309
3	56	1	21.1927	1	0	0	1	0	0	2	112.667	99.578	13.089
3	56	1	21.1927	1	0	0	1	0	0	3	115.401	99.712	15.689
3	56	1	21.1927	1	0	0	1	0	0	4	119.01	100.028	18.982
3	56	1	21.1927	1	0	0	1	0	0	5	114.599	100.26	14.339
3	56	1	21.1927	1	0	0	1	0	0	6	117.639	99.978	17.661
3	56	1	21.1927	1	0	0	2	1	0	1	118.467	103.09	15.377
3	56	1	21.1927	1	0	0	2	1	0	2	118.024	100.895	17.129
3	56	1	21.1927	1	0	0	2	1	0	3	116.8	100.609	16.191
3	56	1	21.1927	1	0	0	2	1	0	4	116.909	100.553	16.356
3	56	1	21.1927	1	0	0	2	1	0	5	117.105	101.587	15.518
3	56	1	21.1927	1	0	0	2	1	0	6	118.038	101.578	16.46
3	56	1	21.1927	1	0	0	3	0	1	1	128.663	104.8	23.863
3	56	1	21.1927	1	0	0	3	0	1	2	126.009	103.925	22.084
3	56	1	21.1927	1	0	0	3	0	1	3	127.121	105.743	21.378
3	56	1	21.1927	1	0	0	3	0	1	4	126.333	106.525	19.808
3	56	1	21.1927	1	0	0	3	0	1	5	127.842	104.461	23.381
3	56	1	21.1927	1	0	0	3	0	1	6	126.66	105.241	21.419
3	56	1	21.1927	2	1	0	1	0	0	1	125.329	106.861	18.468
3	56	1	21.1927	2	1	0	1	0	0	2	130.106	107.508	22.598
3	56	1	21.1927	2	1	0	1	0	0	3	125.694	105.699	19.995
3	56	1	21.1927	2	1	0	1	0	0	4	123.416	106.14	17.276
3	56	1	21.1927	2	1	0	1	0	0	5	122.073	108.582	13.491
3	56	1	21.1927	2	1	0	1	0	0	6	125.07	107.847	17.223
3	56	1	21.1927	2	1	0	2	1	0	1	129.581	114.342	15.239
3	56	1	21.1927	2	1	0	2	1	0	2	132.294	113.11	19.184
3	56	1	21.1927	2	1	0	2	1	0	3	132.6	112.125	20.475
3	56	1	21.1927	2	1	0	2	1	0	4	134.78	112.404	22.376
3	56	1	21.1927	2	1	0	2	1	0	5	131.736	112.298	19.438
3	56	1	21.1927	2	1	0	2	1	0	6	130.096	112.642	17.454
3	56	1	21.1927	2	1	0	3	0	1	1	133.842	107.161	26.681
3	56	1	21.1927	2	1	0	3	0	1	2	130.636	109.05	21.586
3	56	1	21.1927	2	1	0	3	0	1	3	131	106.907	24.093
3	56	1	21.1927	2	1	0	3	0	1	4	130.539	107.453	23.086
3	56	1	21.1927	2	1	0	3	0	1	5	131.845	109.098	22.747
3	56	1	21.1927	2	1	0	3	0	1	6	131.321	109.081	22.24
3	56	1	21.1927	3	0	1	1	0	0	1	125.408	113.791	11.617
3	56	1	21.1927	3	0	1	1	0	0	2	129.178	113.769	15.409
3	56	1	21.1927	3	0	1	1	0	0	3	125.981	113.168	12.813
3	56	1	21.1927	3	0	1	1	0	0	4	126.048	110.562	15.486
3	56	1	21.1927	3	0	1	1	0	0	5	125.704	113.899	11.805
3	56	1	21.1927	3	0	1	1	0	0	6	127.351	117.087	10.264
3	56	1	21.1927	3	0	1	2	1	0	1	129.222	110.853	18.369
3	56	1	21.1927	3	0	1	2	1	0	2	125.275	111.156	14.119
3	56	1	21.1927	3	0	1	2	1	0	3	126.071	111.935	14.136
3	56	1	21.1927	3	0	1	2	1	0	4	128.858	111.785	17.073
3	56	1	21.1927	3	0	1	2	1	0	5	125.3	110.615	14.685
3	56	1	21.1927	3	0	1	2	1	0	6	126.363	109.534	16.829
3	56	1	21.1927	3	0	1	3	0	1	1	132.087	111.4	20.687
3	56	1	21.1927	3	0	1	3	0	1	2	133.893	115.177	18.716
3	56	1	21.1927	3	0	1	3	0	1	3	132.459	111.376	21.083
3	56	1	21.1927	3	0	1	3	0	1	4	133.188	114.518	18.67
3	56	1	21.1927	3	0	1	3	0	1	5	132.846	113.994	18.852
3	56	1	21.1927	3	0	1	3	0	1	6	135.452	113.165	22.287
4	20	1	18.4049	1	0	0	1	0	0	1	138.595	107.674	30.921
4	20	1	18.4049	1	0	0	1	0	0	2	137.291	107.05	30.241
4	20	1	18.4049	1	0	0	1	0	0	3	136.466	107.722	28.744
4	20	1	18.4049	1	0	0	1	0	0	4	138.586	104.949	33.637
4	20	1	18.4049	1	0	0	1	0	0	5	140.103	105.642	34.461
4	20	1	18.4049	1	0	0	1	0	0	6	140.036	106.231	33.805
4	20	1	18.4049	1	0	0	2	1	0	1	125.061	100.928	24.133
4	20	1	18.4049	1	0	0	2	1	0	2	124.206	100.084	24.122
4	20	1	18.4049	1	0	0	2	1	0	3	124.658	100.46	24.198
4	20	1	18.4049	1	0	0	2	1	0	4	123.939	99.094	24.845
4	20	1	18.4049	1	0	0	2	1	0	5	124.767	99.439	25.328
4	20	1	18.4049	1	0	0	2	1	0	6	123.955	98.768	25.187
4	20	1	18.4049	1	0	0	3	0	1	1	139.589	102.361	37.228
4	20	1	18.4049	1	0	0	3	0	1	2	139.195	104.74	34.455
4	20	1	18.4049	1	0	0	3	0	1	3	141.132	104.51	36.622
4	20	1	18.4049	1	0	0	3	0	1	4	138.981	103.774	35.207
4	20	1	18.4049	1	0	0	3	0	1	5	137.845	102.074	35.771
4	20	1	18.4049	1	0	0	3	0	1	6	139.158	103.7	35.458
4	20	1	18.4049	2	1	0	1	0	0	1	140.464	107.848	32.616
4	20	1	18.4049	2	1	0	1	0	0	2	140.848	107.545	33.303
4	20	1	18.4049	2	1	0	1	0	0	3	143.483	108.635	34.848
4	20	1	18.4049	2	1	0	1	0	0	4	144.474	108.097	36.377
4	20	1	18.4049	2	1	0	1	0	0	5	143.396	109.398	33.998
4	20	1	18.4049	2	1	0	1	0	0	6	141.382	109.168	32.214
4	20	1	18.4049	2	1	0	2	1	0	1	135.422	105.457	29.965
4	20	1	18.4049	2	1	0	2	1	0	2	135.726	105.873	29.853
4	20	1	18.4049	2	1	0	2	1	0	3	138.644	105.564	33.08
4	20	1	18.4049	2	1	0	2	1	0	4	137.997	107.174	30.823
4	20	1	18.4049	2	1	0	2	1	0	5	137.504	105.571	31.933
4	20	1	18.4049	2	1	0	2	1	0	6	134.749	105.932	28.817
4	20	1	18.4049	2	1	0	3	0	1	1	138.404	110.496	27.908
4	20	1	18.4049	2	1	0	3	0	1	2	139.815	109.533	30.282
4	20	1	18.4049	2	1	0	3	0	1	3	141.276	109.407	31.869
4	20	1	18.4049	2	1	0	3	0	1	4	141.634	110.086	31.548
4	20	1	18.4049	2	1	0	3	0	1	5	140.414	109.846	30.568
4	20	1	18.4049	2	1	0	3	0	1	6	139.969	108.049	31.92
4	20	1	18.4049	3	0	1	1	0	0	1	136.273	104.683	31.59
4	20	1	18.4049	3	0	1	1	0	0	2	134.178	105.136	29.042
4	20	1	18.4049	3	0	1	1	0	0	3	135.815	105.293	30.522
4	20	1	18.4049	3	0	1	1	0	0	4	134.4	105.144	29.256
4	20	1	18.4049	3	0	1	1	0	0	5	136.105	104.802	31.303
4	20	1	18.4049	3	0	1	1	0	0	6	135.04	104.499	30.541
4	20	1	18.4049	3	0	1	2	1	0	1	123.045	97.78	25.265
4	20	1	18.4049	3	0	1	2	1	0	2	122.332	100.22	22.112
4	20	1	18.4049	3	0	1	2	1	0	3	123.891	98.924	24.967
4	20	1	18.4049	3	0	1	2	1	0	4	125.814	97.71	28.104
4	20	1	18.4049	3	0	1	2	1	0	5	123.789	97.833	25.956
4	20	1	18.4049	3	0	1	2	1	0	6	123.536	99.025	24.511
4	20	1	18.4049	3	0	1	3	0	1	1	131.283	98.657	32.626
4	20	1	18.4049	3	0	1	3	0	1	2	139.218	102.103	37.115
4	20	1	18.4049	3	0	1	3	0	1	3	129.036	103.436	25.6
4	20	1	18.4049	3	0	1	3	0	1	4	131.631	102.44	29.191
4	20	1	18.4049	3	0	1	3	0	1	5	130.538	102.312	28.226
4	20	1	18.4049	3	0	1	3	0	1	6	131.399	100.724	30.675
5	37	0	26.7712	1	0	0	1	0	0	1	135.937	112.87	23.067
5	37	0	26.7712	1	0	0	1	0	0	2	136.071	110.242	25.829
5	37	0	26.7712	1	0	0	1	0	0	3	137.726	109.741	27.985
5	37	0	26.7712	1	0	0	1	0	0	4	136.172	109.688	26.484
5	37	0	26.7712	1	0	0	1	0	0	5	130.593	110.313	20.28
5	37	0	26.7712	1	0	0	1	0	0	6	133.845	109.537	24.308
5	37	0	26.7712	1	0	0	2	1	0	1	126.058	106.372	19.686
5	37	0	26.7712	1	0	0	2	1	0	2	125.543	104.315	21.228
5	37	0	26.7712	1	0	0	2	1	0	3	125.679	105.631	20.048
5	37	0	26.7712	1	0	0	2	1	0	4	128.448	107.131	21.317
5	37	0	26.7712	1	0	0	2	1	0	5	129.668	107.1	22.568
5	37	0	26.7712	1	0	0	2	1	0	6	124.114	107.15	16.964
5	37	0	26.7712	1	0	0	3	0	1	1	128.773	105.007	23.766
5	37	0	26.7712	1	0	0	3	0	1	2	122.085	111.201	10.884
5	37	0	26.7712	1	0	0	3	0	1	3	128.725	103.944	24.781
5	37	0	26.7712	1	0	0	3	0	1	4	128.227	107.25	20.977
5	37	0	26.7712	1	0	0	3	0	1	5	129.704	106.616	23.088
5	37	0	26.7712	1	0	0	3	0	1	6	127.263	105.481	21.782
5	37	0	26.7712	2	1	0	1	0	0	1	134.428	105.814	28.614
5	37	0	26.7712	2	1	0	1	0	0	2	134.19	106.994	27.196
5	37	0	26.7712	2	1	0	1	0	0	3	134.576	103.725	30.851
5	37	0	26.7712	2	1	0	1	0	0	4	132.013	105.136	26.877
5	37	0	26.7712	2	1	0	1	0	0	5	133.92	103.63	30.29
5	37	0	26.7712	2	1	0	1	0	0	6	133.661	105.151	28.51
5	37	0	26.7712	2	1	0	2	1	0	1	134.348	108.773	25.575
5	37	0	26.7712	2	1	0	2	1	0	2	132.974	108.035	24.939
5	37	0	26.7712	2	1	0	2	1	0	3	133.11	107.631	25.479
5	37	0	26.7712	2	1	0	2	1	0	4	133.526	108.107	25.419
5	37	0	26.7712	2	1	0	2	1	0	5	133.093	109.141	23.952
5	37	0	26.7712	2	1	0	2	1	0	6	131.116
5	37	0	26.7712	2	1	0	3	0	1	1	133.619	108.326	25.293
5	37	0	26.7712	2	1	0	3	0	1	2	133.521	108.17	25.351
5	37	0	26.7712	2	1	0	3	0	1	3	131.641	108.577	23.064
5	37	0	26.7712	2	1	0	3	0	1	4	134.241	107.912	26.329
5	37	0	26.7712	2	1	0	3	0	1	5	134.925	107.452	27.473
5	37	0	26.7712	2	1	0	3	0	1	6	132.352	108.032	24.32
5	37	0	26.7712	3	0	1	1	0	0	1	131.533	107.751	23.782
5	37	0	26.7712	3	0	1	1	0	0	2	132.431	105.178	27.253
5	37	0	26.7712	3	0	1	1	0	0	3	130.034	108.441	21.593
5	37	0	26.7712	3	0	1	1	0	0	4	132.251	109.251	23
5	37	0	26.7712	3	0	1	1	0	0	5	131.866	108.02	23.846
5	37	0	26.7712	3	0	1	1	0	0	6	131.871	107.135	24.736
5	37	0	26.7712	3	0	1	2	1	0	1	127.483	105.818	21.665
5	37	0	26.7712	3	0	1	2	1	0	2	127.214	106.466	20.748
5	37	0	26.7712	3	0	1	2	1	0	3	126.024	104.451	21.573
5	37	0	26.7712	3	0	1	2	1	0	4	125.918	105.139	20.779
5	37	0	26.7712	3	0	1	2	1	0	5	126.013	104.104	21.909
5	37	0	26.7712	3	0	1	2	1	0	6	126.076	104.169	21.907
5	37	0	26.7712	3	0	1	3	0	1	1	127.398	106.062	21.336
5	37	0	26.7712	3	0	1	3	0	1	2	127.207	107.651	19.556
5	37	0	26.7712	3	0	1	3	0	1	3	109.597	104.761	4.836
5	37	0	26.7712	3	0	1	3	0	1	4	127.804	106.326	21.478
5	37	0	26.7712	3	0	1	3	0	1	5	129.225	105.539	23.686
5	37	0	26.7712	3	0	1	3	0	1	6	124.57	109.663	14.907
6	44	1	32.7694	1	0	0	1	0	0	1	135.577	108.912	26.665
6	44	1	32.7694	1	0	0	1	0	0	2	138.009	107.27	30.739
6	44	1	32.7694	1	0	0	1	0	0	3	137.86	108.948	28.912
6	44	1	32.7694	1	0	0	1	0	0	4	137.364	108.1	29.264
6	44	1	32.7694	1	0	0	1	0	0	5	135.526	106.698	28.828
6	44	1	32.7694	1	0	0	1	0	0	6	134.767	106.956	27.811
6	44	1	32.7694	1	0	0	2	1	0	1	126.767	102.313	24.454
6	44	1	32.7694	1	0	0	2	1	0	2	126.703	101.717	24.986
6	44	1	32.7694	1	0	0	2	1	0	3	128.412	102.803	25.609
6	44	1	32.7694	1	0	0	2	1	0	4	128.977	103.953	25.024
6	44	1	32.7694	1	0	0	2	1	0	5	126.223	103.108	23.115
6	44	1	32.7694	1	0	0	2	1	0	6	127.292	103.951	23.341
6	44	1	32.7694	1	0	0	3	0	1	1	138.472	113.663	24.809
6	44	1	32.7694	1	0	0	3	0	1	2	142.86	111.414	31.446
6	44	1	32.7694	1	0	0	3	0	1	3	139.918	111.747	28.171
6	44	1	32.7694	1	0	0	3	0	1	4	140.255	111.13	29.125
6	44	1	32.7694	1	0	0	3	0	1	5	138.708	112.463	26.245
6	44	1	32.7694	1	0	0	3	0	1	6	141.085	111.342	29.743
6	44	1	32.7694	2	1	0	1	0	0	1	142.767	116.711	26.056
6	44	1	32.7694	2	1	0	1	0	0	2	144.364	114.84	29.524
6	44	1	32.7694	2	1	0	1	0	0	3	143.281	114.788	28.493
6	44	1	32.7694	2	1	0	1	0	0	4	140.59	114.647	25.943
6	44	1	32.7694	2	1	0	1	0	0	5	136.655	113.263	23.392
6	44	1	32.7694	2	1	0	1	0	0	6	142.309	117.931	24.378
6	44	1	32.7694	2	1	0	2	1	0	1
6	44	1	32.7694	2	1	0	2	1	0	2
6	44	1	32.7694	2	1	0	2	1	0	3
6	44	1	32.7694	2	1	0	2	1	0	4
6	44	1	32.7694	2	1	0	2	1	0	5
6	44	1	32.7694	2	1	0	2	1	0	6
6	44	1	32.7694	2	1	0	3	0	1	1	130.48	99.502	30.978
6	44	1	32.7694	2	1	0	3	0	1	2	127.931	99.935	27.996
6	44	1	32.7694	2	1	0	3	0	1	3	129.103	100.861	28.242
6	44	1	32.7694	2	1	0	3	0	1	4	129.849	100.1	29.749
6	44	1	32.7694	2	1	0	3	0	1	5	131.042	99.835	31.207
6	44	1	32.7694	2	1	0	3	0	1	6	128.564	99.477	29.087
6	44	1	32.7694	3	0	1	1	0	0	1	141.034	116.285	24.749
6	44	1	32.7694	3	0	1	1	0	0	2	137.934	116.128	21.806
6	44	1	32.7694	3	0	1	1	0	0	3	138.318	116.73	21.588
6	44	1	32.7694	3	0	1	1	0	0	4	140.65	115.806	24.844
6	44	1	32.7694	3	0	1	1	0	0	5	140.905	116.187	24.718
6	44	1	32.7694	3	0	1	1	0	0	6	140.326	115.287	25.039
6	44	1	32.7694	3	0	1	2	1	0	1	133.375	109.028	24.347
6	44	1	32.7694	3	0	1	2	1	0	2	132.5	111.312	21.188
6	44	1	32.7694	3	0	1	2	1	0	3	132.497	110.097	22.4
6	44	1	32.7694	3	0	1	2	1	0	4	132.536	109.983	22.553
6	44	1	32.7694	3	0	1	2	1	0	5	130.443	114.437	16.006
6	44	1	32.7694	3	0	1	2	1	0	6	133.647	109.143	24.504
6	44	1	32.7694	3	0	1	3	0	1	1	137.852	109.623	28.229
6	44	1	32.7694	3	0	1	3	0	1	2	139.182	109.472	29.71
6	44	1	32.7694	3	0	1	3	0	1	3	139.231	110.201	29.03
6	44	1	32.7694	3	0	1	3	0	1	4	141.252	107.669	33.583
6	44	1	32.7694	3	0	1	3	0	1	5	140.464	110.781	29.683
6	44	1	32.7694	3	0	1	3	0	1	6	138.42	109.102	29.318
7	26	0	24.179	1	0	0	1	0	0	1	135.111	110.246	24.865
7	26	0	24.179	1	0	0	1	0	0	2	130.4	109.55	20.85
7	26	0	24.179	1	0	0	1	0	0	3	132.32	107.66	24.66
7	26	0	24.179	1	0	0	1	0	0	4	130	108.141	21.859
7	26	0	24.179	1	0	0	1	0	0	5	129.41	107.629	21.781
7	26	0	24.179	1	0	0	1	0	0	6	128.66	105.393	23.267
7	26	0	24.179	1	0	0	2	1	0	1	130.786	112.082	18.704
7	26	0	24.179	1	0	0	2	1	0	2	128.391	111.527	16.864
7	26	0	24.179	1	0	0	2	1	0	3	126.592	112.615	13.977
7	26	0	24.179	1	0	0	2	1	0	4	128.878	109.231	19.647
7	26	0	24.179	1	0	0	2	1	0	5	126.85	110.132	16.718
7	26	0	24.179	1	0	0	2	1	0	6	126.593	108.268	18.325
7	26	0	24.179	1	0	0	3	0	1	1	145.569	123.106	22.463
7	26	0	24.179	1	0	0	3	0	1	2	141.683	126.276	15.407
7	26	0	24.179	1	0	0	3	0	1	3	143.49	124.871	18.619
7	26	0	24.179	1	0	0	3	0	1	4	144.445	125.613	18.832
7	26	0	24.179	1	0	0	3	0	1	5	145.231	121.918	23.313
7	26	0	24.179	1	0	0	3	0	1	6	146.175	120.113	26.062
7	26	0	24.179	2	1	0	1	0	0	1	135.77	106.839	28.931
7	26	0	24.179	2	1	0	1	0	0	2	131.765	111.164	20.601
7	26	0	24.179	2	1	0	1	0	0	3	137.909	107.664	30.245
7	26	0	24.179	2	1	0	1	0	0	4	135.674	108.436	27.238
7	26	0	24.179	2	1	0	1	0	0	5	134.352	107.962	26.39
7	26	0	24.179	2	1	0	1	0	0	6	134.819	108.044	26.775
7	26	0	24.179	2	1	0	2	1	0	1	130.69	107.686	23.004
7	26	0	24.179	2	1	0	2	1	0	2	130.043	105.007	25.036
7	26	0	24.179	2	1	0	2	1	0	3	133.353	105.142	28.211
7	26	0	24.179	2	1	0	2	1	0	4	131.261	106.906	24.355
7	26	0	24.179	2	1	0	2	1	0	5	131.129	106.886	24.243
7	26	0	24.179	2	1	0	2	1	0	6	134.748	105.387	29.361
7	26	0	24.179	2	1	0	3	0	1	1	140.311	114.925	25.386
7	26	0	24.179	2	1	0	3	0	1	2	141.593	112.748	28.845
7	26	0	24.179	2	1	0	3	0	1	3	140.376	133.279	7.097
7	26	0	24.179	2	1	0	3	0	1	4	139.002	113.196	25.806
7	26	0	24.179	2	1	0	3	0	1	5	140.205	112.66	27.545
7	26	0	24.179	2	1	0	3	0	1	6	137.68	112.697	24.983
7	26	0	24.179	3	0	1	1	0	0	1	132.786	101.568	31.218
7	26	0	24.179	3	0	1	1	0	0	2	127.877	102.442	25.435
7	26	0	24.179	3	0	1	1	0	0	3	125.11	102.063	23.047
7	26	0	24.179	3	0	1	1	0	0	4	126.679	101.776	24.903
7	26	0	24.179	3	0	1	1	0	0	5	126.794	103.085	23.709
7	26	0	24.179	3	0	1	1	0	0	6	127.579	102.609	24.97
7	26	0	24.179	3	0	1	2	1	0	1	133.662	112.779	20.883
7	26	0	24.179	3	0	1	2	1	0	2	132.348	112.94	19.408
7	26	0	24.179	3	0	1	2	1	0	3	131.962	114.555	17.407
7	26	0	24.179	3	0	1	2	1	0	4	134.442	112.527	21.915
7	26	0	24.179	3	0	1	2	1	0	5	131.822	113.623	18.199
7	26	0	24.179	3	0	1	2	1	0	6	135.529	113.2	22.329
7	26	0	24.179	3	0	1	3	0	1	1	133.223	111.474	21.749
7	26	0	24.179	3	0	1	3	0	1	2	136.423	110.072	26.351
7	26	0	24.179	3	0	1	3	0	1	3	136.713	110.501	26.212
7	26	0	24.179	3	0	1	3	0	1	4	131.557	108.118	23.439
7	26	0	24.179	3	0	1	3	0	1	5	132.102	109.33	22.772
7	26	0	24.179	3	0	1	3	0	1	6	132.166	109.934	22.232
8	47	1	38.0142	1	0	0	1	0	0	1	122.233	98.593	23.64
8	47	1	38.0142	1	0	0	1	0	0	2	121.114	99.23	21.884
8	47	1	38.0142	1	0	0	1	0	0	3	125.711	98.293	27.418
8	47	1	38.0142	1	0	0	1	0	0	4	122.26	101.007	21.253
8	47	1	38.0142	1	0	0	1	0	0	5	125.558	100.217	25.341
8	47	1	38.0142	1	0	0	1	0	0	6	123.6	98.675	24.925
8	47	1	38.0142	1	0	0	2	1	0	1	119.714	97.9	21.814
8	47	1	38.0142	1	0	0	2	1	0	2	124.767	96.432	28.335
8	47	1	38.0142	1	0	0	2	1	0	3	122.166	96.061	26.105
8	47	1	38.0142	1	0	0	2	1	0	4	122.53	94.38	28.15
8	47	1	38.0142	1	0	0	2	1	0	5	121.258	96.181	25.077
8	47	1	38.0142	1	0	0	2	1	0	6	121.388	95.489	25.899
8	47	1	38.0142	1	0	0	3	0	1	1	124.05	96.435	27.615
8	47	1	38.0142	1	0	0	3	0	1	2	125.653	92.804	32.849
8	47	1	38.0142	1	0	0	3	0	1	3	124.385	94.275	30.11
8	47	1	38.0142	1	0	0	3	0	1	4	123.362	93.293	30.069
8	47	1	38.0142	1	0	0	3	0	1	5	123.845	92.625	31.22
8	47	1	38.0142	1	0	0	3	0	1	6	126.124	92.474	33.65
8	47	1	38.0142	2	1	0	1	0	0	1	140.573	103.309	37.264
8	47	1	38.0142	2	1	0	1	0	0	2	143.059	102.097	40.962
8	47	1	38.0142	2	1	0	1	0	0	3	139.485	101.697	37.788
8	47	1	38.0142	2	1	0	1	0	0	4	140.26	102.328	37.932
8	47	1	38.0142	2	1	0	1	0	0	5	143.029	102.457	40.572
8	47	1	38.0142	2	1	0	1	0	0	6	141.425	103.443	37.982
8	47	1	38.0142	2	1	0	2	1	0	1
8	47	1	38.0142	2	1	0	2	1	0	2
8	47	1	38.0142	2	1	0	2	1	0	3
8	47	1	38.0142	2	1	0	2	1	0	4
8	47	1	38.0142	2	1	0	2	1	0	5
8	47	1	38.0142	2	1	0	2	1	0	6
8	47	1	38.0142	2	1	0	3	0	1	1	128.832	99.788	29.044
8	47	1	38.0142	2	1	0	3	0	1	2	133.852	99.282	34.57
8	47	1	38.0142	2	1	0	3	0	1	3	130.118	98.307	31.811
8	47	1	38.0142	2	1	0	3	0	1	4	128.453	99.015	29.438
8	47	1	38.0142	2	1	0	3	0	1	5	132.261	98.959	33.302
8	47	1	38.0142	2	1	0	3	0	1	6	133.015	98.83	34.185
8	47	1	38.0142	3	0	1	1	0	0	1	126.738	99.722	27.016
8	47	1	38.0142	3	0	1	1	0	0	2	124.144	99.98	24.164
8	47	1	38.0142	3	0	1	1	0	0	3	126.098	101.687	24.411
8	47	1	38.0142	3	0	1	1	0	0	4	129.622	99.389	30.233
8	47	1	38.0142	3	0	1	1	0	0	5	128.604	100.357	28.247
8	47	1	38.0142	3	0	1	1	0	0	6	128.287	102.75	25.537
8	47	1	38.0142	3	0	1	2	1	0	1	126.07	101.975	24.095
8	47	1	38.0142	3	0	1	2	1	0	2	127.913	101.189	26.724
8	47	1	38.0142	3	0	1	2	1	0	3	127.573	101.513	26.06
8	47	1	38.0142	3	0	1	2	1	0	4	128.009	100.785	27.224
8	47	1	38.0142	3	0	1	2	1	0	5	127.547	101.926	25.621
8	47	1	38.0142	3	0	1	2	1	0	6	127.628	101.251	26.377
8	47	1	38.0142	3	0	1	3	0	1	1	118.482	87.593	30.889
8	47	1	38.0142	3	0	1	3	0	1	2	120.051	86.949	33.102
8	47	1	38.0142	3	0	1	3	0	1	3	120.435	85.886	34.549
8	47	1	38.0142	3	0	1	3	0	1	4	119.838	85.957	33.881
8	47	1	38.0142	3	0	1	3	0	1	5	119.635	86.491	33.144
8	47	1	38.0142	3	0	1	3	0	1	6	119.826	86.383	33.443
9	45	0	26.2202	1	0	0	1	0	0	1	125.081	97.665	27.416
9	45	0	26.2202	1	0	0	1	0	0	2	125.807	101.097	24.71
9	45	0	26.2202	1	0	0	1	0	0	3	124.36	100.959	23.401
9	45	0	26.2202	1	0	0	1	0	0	4	126.164	99.796	26.368
9	45	0	26.2202	1	0	0	1	0	0	5	118.656	99.399	19.257
9	45	0	26.2202	1	0	0	1	0	0	6	125.672	100.12	25.552
9	45	0	26.2202	1	0	0	2	1	0	1	126.24	105.083	21.157
9	45	0	26.2202	1	0	0	2	1	0	2	127.774	103.792	23.982
9	45	0	26.2202	1	0	0	2	1	0	3	125.404	103.813	21.591
9	45	0	26.2202	1	0	0	2	1	0	4	126.288	103.784	22.504
9	45	0	26.2202	1	0	0	2	1	0	5	125.613	104.436	21.177
9	45	0	26.2202	1	0	0	2	1	0	6	125.674	103.746	21.928
9	45	0	26.2202	1	0	0	3	0	1	1	141.157	113.876	27.281
9	45	0	26.2202	1	0	0	3	0	1	2	140.188	115.612	24.576
9	45	0	26.2202	1	0	0	3	0	1	3	142.171	114.566	27.605
9	45	0	26.2202	1	0	0	3	0	1	4	141.856	115.838	26.018
9	45	0	26.2202	1	0	0	3	0	1	5	140.148	115.555	24.593
9	45	0	26.2202	1	0	0	3	0	1	6	139.111	115.288	23.823
9	45	0	26.2202	2	1	0	1	0	0	1	130.242	99.526	30.716
9	45	0	26.2202	2	1	0	1	0	0	2	129.25	103.603	25.647
9	45	0	26.2202	2	1	0	1	0	0	3	131.408	100.809	30.599
9	45	0	26.2202	2	1	0	1	0	0	4	132.311	100.541	31.77
9	45	0	26.2202	2	1	0	1	0	0	5	130.522	99.657	30.865
9	45	0	26.2202	2	1	0	1	0	0	6	130.818	99.486	31.332
9	45	0	26.2202	2	1	0	2	1	0	1
9	45	0	26.2202	2	1	0	2	1	0	2
9	45	0	26.2202	2	1	0	2	1	0	3
9	45	0	26.2202	2	1	0	2	1	0	4
9	45	0	26.2202	2	1	0	2	1	0	5
9	45	0	26.2202	2	1	0	2	1	0	6
9	45	0	26.2202	2	1	0	3	0	1	1	130.411	99.395	31.016
9	45	0	26.2202	2	1	0	3	0	1	2	130.021	98.409	31.612
9	45	0	26.2202	2	1	0	3	0	1	3	130.096	98.486	31.61
9	45	0	26.2202	2	1	0	3	0	1	4	128.571	99.582	28.989
9	45	0	26.2202	2	1	0	3	0	1	5	132.575	98.599	33.976
9	45	0	26.2202	2	1	0	3	0	1	6	131.248	100.393	30.855
9	45	0	26.2202	3	0	1	1	0	0	1	125.621	103.44	22.181
9	45	0	26.2202	3	0	1	1	0	0	2	124.545	103.397	21.148
9	45	0	26.2202	3	0	1	1	0	0	3	121.52	102.516	19.004
9	45	0	26.2202	3	0	1	1	0	0	4	127.116	103.868	23.248
9	45	0	26.2202	3	0	1	1	0	0	5	126.248	100.912	25.336
9	45	0	26.2202	3	0	1	1	0	0	6	126.646	101.39	25.256
9	45	0	26.2202	3	0	1	2	1	0	1	132.129	107.805	24.324
9	45	0	26.2202	3	0	1	2	1	0	2	129.911	105.236	24.675
9	45	0	26.2202	3	0	1	2	1	0	3	128.921	106.451	22.47
9	45	0	26.2202	3	0	1	2	1	0	4	130.004	101.099	28.905
9	45	0	26.2202	3	0	1	2	1	0	5	125.605	104.541	21.064
9	45	0	26.2202	3	0	1	2	1	0	6	128.762	106.305	22.457
9	45	0	26.2202	3	0	1	3	0	1	1	129.725	92.16	37.565
9	45	0	26.2202	3	0	1	3	0	1	2	125.881	95.523	30.358
9	45	0	26.2202	3	0	1	3	0	1	3	127	94.309	32.691
9	45	0	26.2202	3	0	1	3	0	1	4	127.903	93.582	34.321
9	45	0	26.2202	3	0	1	3	0	1	5	127.985	94.139	33.846
9	45	0	26.2202	3	0	1	3	0	1	6	128.671	96.597	32.074
10	29	0	18.7242	1	0	0	1	0	0	1	119.45	101.371	18.079
10	29	0	18.7242	1	0	0	1	0	0	2	126.572	102.467	24.105
10	29	0	18.7242	1	0	0	1	0	0	3	117.573	102.069	15.504
10	29	0	18.7242	1	0	0	1	0	0	4	119.372	101.073	18.299
10	29	0	18.7242	1	0	0	1	0	0	5	126.346	101.493	24.853
10	29	0	18.7242	1	0	0	1	0	0	6	121.397	102.251	19.146
10	29	0	18.7242	1	0	0	2	1	0	1	133.435	105.724	27.711
10	29	0	18.7242	1	0	0	2	1	0	2	127.563	103.178	24.385
10	29	0	18.7242	1	0	0	2	1	0	3	120.905	105.992	14.913
10	29	0	18.7242	1	0	0	2	1	0	4	121.89	107.399	14.491
10	29	0	18.7242	1	0	0	2	1	0	5	125.496	108.55	16.946
10	29	0	18.7242	1	0	0	2	1	0	6	126.259	105.55	20.709
10	29	0	18.7242	1	0	0	3	0	1	1	114.477	103.181	11.296
10	29	0	18.7242	1	0	0	3	0	1	2	117.123	103.025	14.098
10	29	0	18.7242	1	0	0	3	0	1	3	118.284	103.095	15.189
10	29	0	18.7242	1	0	0	3	0	1	4	118.627	102.332	16.295
10	29	0	18.7242	1	0	0	3	0	1	5	111.879	103.872	8.007
10	29	0	18.7242	1	0	0	3	0	1	6	114.066	102.466	11.6
10	29	0	18.7242	2	1	0	1	0	0	1	129.503	109.451	20.052
10	29	0	18.7242	2	1	0	1	0	0	2	127.142	108.614	18.528
10	29	0	18.7242	2	1	0	1	0	0	3	129.272	107.529	21.743
10	29	0	18.7242	2	1	0	1	0	0	4	125.887	108.126	17.761
10	29	0	18.7242	2	1	0	1	0	0	5	125	127.702	2.702
10	29	0	18.7242	2	1	0	1	0	0	6	128.749	109.72	19.029
10	29	0	18.7242	2	1	0	2	1	0	1
10	29	0	18.7242	2	1	0	2	1	0	2
10	29	0	18.7242	2	1	0	2	1	0	3
10	29	0	18.7242	2	1	0	2	1	0	4
10	29	0	18.7242	2	1	0	2	1	0	5
10	29	0	18.7242	2	1	0	2	1	0	6
10	29	0	18.7242	2	1	0	3	0	1	1	124.463	103.554	20.909
10	29	0	18.7242	2	1	0	3	0	1	2	126.398	100.941	25.457
10	29	0	18.7242	2	1	0	3	0	1	3	128.054	101.871	26.183
10	29	0	18.7242	2	1	0	3	0	1	4	123.63	103.759	19.871
10	29	0	18.7242	2	1	0	3	0	1	5	122.492	101.766	20.726
10	29	0	18.7242	2	1	0	3	0	1	6	118.58	102.981	15.599
10	29	0	18.7242	3	0	1	1	0	0	1	122.21	104.724	17.486
10	29	0	18.7242	3	0	1	1	0	0	2	119.89	105.698	14.192
10	29	0	18.7242	3	0	1	1	0	0	3	120.501	104.637	15.864
10	29	0	18.7242	3	0	1	1	0	0	4	123.622	103.059	20.563
10	29	0	18.7242	3	0	1	1	0	0	5	124.02	105.291	18.729
10	29	0	18.7242	3	0	1	1	0	0	6	125.609	105.478	20.131
10	29	0	18.7242	3	0	1	2	1	0	1	124.517	100.653	23.864
10	29	0	18.7242	3	0	1	2	1	0	2	122.813	100.82	21.993
10	29	0	18.7242	3	0	1	2	1	0	3	122.992	99.796	23.196
10	29	0	18.7242	3	0	1	2	1	0	4	120.703	100.62	20.083
10	29	0	18.7242	3	0	1	2	1	0	5	123.159	102.529	20.63
10	29	0	18.7242	3	0	1	2	1	0	6	119.148	104.378	14.77
10	29	0	18.7242	3	0	1	3	0	1	1	122.942	108.369	14.573
10	29	0	18.7242	3	0	1	3	0	1	2	123.207	108.108	15.099
10	29	0	18.7242	3	0	1	3	0	1	3	120.884	108.6	12.284
10	29	0	18.7242	3	0	1	3	0	1	4	126.198	107.949	18.249
10	29	0	18.7242	3	0	1	3	0	1	5	127.055	106.631	20.424
10	29	0	18.7242	3	0	1	3	0	1	6	129.496	108.399	21.097
11	29	0	25.0928	1	0	0	1	0	0	1	138.024	118.365	19.659
11	29	0	25.0928	1	0	0	1	0	0	2	137.615	117.33	20.285
11	29	0	25.0928	1	0	0	1	0	0	3	137.848	116.549	21.299
11	29	0	25.0928	1	0	0	1	0	0	4	136.042	116.487	19.555
11	29	0	25.0928	1	0	0	1	0	0	5	137.889	117.264	20.625
11	29	0	25.0928	1	0	0	1	0	0	6	138.432	116.389	22.043
11	29	0	25.0928	1	0	0	2	1	0	1	132.982	114.993	17.989
11	29	0	25.0928	1	0	0	2	1	0	2	135.114	114.875	20.239
11	29	0	25.0928	1	0	0	2	1	0	3	134.71	113.763	20.947
11	29	0	25.0928	1	0	0	2	1	0	4	134.943	114.152	20.791
11	29	0	25.0928	1	0	0	2	1	0	5	134.042	113.073	20.969
11	29	0	25.0928	1	0	0	2	1	0	6	134.355	114.932	19.423
11	29	0	25.0928	1	0	0	3	0	1	1	132.088	111.719	20.369
11	29	0	25.0928	1	0	0	3	0	1	2	133.052	114.327	18.725
11	29	0	25.0928	1	0	0	3	0	1	3	134.191	115.637	18.554
11	29	0	25.0928	1	0	0	3	0	1	4	129.786	114.158	15.628
11	29	0	25.0928	1	0	0	3	0	1	5	127.53	109.794	17.736
11	29	0	25.0928	1	0	0	3	0	1	6	133.308	114.962	18.346
11	29	0	25.0928	2	1	0	1	0	0	1	133.934	112.394	21.54
11	29	0	25.0928	2	1	0	1	0	0	2	134.251	110.79	23.461
11	29	0	25.0928	2	1	0	1	0	0	3	135.083	112.129	22.954
11	29	0	25.0928	2	1	0	1	0	0	4	134.037	112.565	21.472
11	29	0	25.0928	2	1	0	1	0	0	5	134.524	111.24	23.284
11	29	0	25.0928	2	1	0	1	0	0	6	134.257	110.78	23.477
11	29	0	25.0928	2	1	0	2	1	0	1	138.433	114.47	23.963
11	29	0	25.0928	2	1	0	2	1	0	2	139.328	113.406	25.922
11	29	0	25.0928	2	1	0	2	1	0	3	139.068	115.51	23.558
11	29	0	25.0928	2	1	0	2	1	0	4	139.588	114.581	25.007
11	29	0	25.0928	2	1	0	2	1	0	5	138.533	113.173	25.36
11	29	0	25.0928	2	1	0	2	1	0	6	138.031	114.207	23.824
11	29	0	25.0928	2	1	0	3	0	1	1	134.605	116.996	17.609
11	29	0	25.0928	2	1	0	3	0	1	2	136.298	116.802	19.496
11	29	0	25.0928	2	1	0	3	0	1	3	137.065	117.467	19.598
11	29	0	25.0928	2	1	0	3	0	1	4	140.422	117.23	23.192
11	29	0	25.0928	2	1	0	3	0	1	5	138.296	118.038	20.258
11	29	0	25.0928	2	1	0	3	0	1	6	137.766	117.108	20.658
11	29	0	25.0928	3	0	1	1	0	0	1	132.215	112.029	20.186
11	29	0	25.0928	3	0	1	1	0	0	2	132.425	112.25	20.175
11	29	0	25.0928	3	0	1	1	0	0	3	131.923	111.441	20.482
11	29	0	25.0928	3	0	1	1	0	0	4	131.324	110.843	20.481
11	29	0	25.0928	3	0	1	1	0	0	5	132.306	110.366	21.94
11	29	0	25.0928	3	0	1	1	0	0	6	130.914	113.294	17.62
11	29	0	25.0928	3	0	1	2	1	0	1	127.581	109.54	18.041
11	29	0	25.0928	3	0	1	2	1	0	2	130.741	112.26	18.481
11	29	0	25.0928	3	0	1	2	1	0	3	130.714	110.325	20.389
11	29	0	25.0928	3	0	1	2	1	0	4	131.975	111.557	20.418
11	29	0	25.0928	3	0	1	2	1	0	5	128.209	109.827	18.382
11	29	0	25.0928	3	0	1	2	1	0	6	131.449	108.856	22.593
11	29	0	25.0928	3	0	1	3	0	1	1	134.745	112.244	22.501
11	29	0	25.0928	3	0	1	3	0	1	2	135.119	111.599	23.52
11	29	0	25.0928	3	0	1	3	0	1	3	134.873	113.896	20.977
11	29	0	25.0928	3	0	1	3	0	1	4	136.997	112.327	24.67
11	29	0	25.0928	3	0	1	3	0	1	5	134.923	112.434	22.489
11	29	0	25.0928	3	0	1	3	0	1	6	134.263	113.196	21.067
12	38	1	20.8429	1	0	0	1	0	0	1	134.244	101.369	32.875
12	38	1	20.8429	1	0	0	1	0	0	2	135.371	104.77	30.601
12	38	1	20.8429	1	0	0	1	0	0	3	138.375	102.299	36.076
12	38	1	20.8429	1	0	0	1	0	0	4	137.438	103.398	34.04
12	38	1	20.8429	1	0	0	1	0	0	5	149.391	103.47	45.921
12	38	1	20.8429	1	0	0	1	0	0	6	141.025	103.941	37.084
12	38	1	20.8429	1	0	0	2	1	0	1	123.795	105.621	18.174
12	38	1	20.8429	1	0	0	2	1	0	2	126.634	104.572	22.062
12	38	1	20.8429	1	0	0	2	1	0	3	127.835	106.379	21.456
12	38	1	20.8429	1	0	0	2	1	0	4	124.141	106.117	18.024
12	38	1	20.8429	1	0	0	2	1	0	5	127.937	105.281	22.656
12	38	1	20.8429	1	0	0	2	1	0	6	130.746	106.079	24.667
12	38	1	20.8429	1	0	0	3	0	1	1	136.997	108.319	28.678
12	38	1	20.8429	1	0	0	3	0	1	2	138.323	106.834	31.489
12	38	1	20.8429	1	0	0	3	0	1	3	136.884	107.436	29.448
12	38	1	20.8429	1	0	0	3	0	1	4	135.79	108.282	27.508
12	38	1	20.8429	1	0	0	3	0	1	5	137.338	108	29.338
12	38	1	20.8429	1	0	0	3	0	1	6	135.79	108.277	27.513
12	38	1	20.8429	2	1	0	1	0	0	1	134.226	103.501	30.725
12	38	1	20.8429	2	1	0	1	0	0	2	133.328	103.753	29.575
12	38	1	20.8429	2	1	0	1	0	0	3	135.786	103.068	32.718
12	38	1	20.8429	2	1	0	1	0	0	4	133.296	102.965	30.331
12	38	1	20.8429	2	1	0	1	0	0	5	133.131	102.204	30.927
12	38	1	20.8429	2	1	0	1	0	0	6	133.015	102.421	30.594
12	38	1	20.8429	2	1	0	2	1	0	1
12	38	1	20.8429	2	1	0	2	1	0	2
12	38	1	20.8429	2	1	0	2	1	0	3
12	38	1	20.8429	2	1	0	2	1	0	4
12	38	1	20.8429	2	1	0	2	1	0	5
12	38	1	20.8429	2	1	0	2	1	0	6
12	38	1	20.8429	2	1	0	3	0	1	1	134.578	105.565	29.013
12	38	1	20.8429	2	1	0	3	0	1	2	134.54	104.572	29.968
12	38	1	20.8429	2	1	0	3	0	1	3	130.819	105.395	25.424
12	38	1	20.8429	2	1	0	3	0	1	4	132.578	105.321	27.257
12	38	1	20.8429	2	1	0	3	0	1	5	133.043	105.987	27.056
12	38	1	20.8429	2	1	0	3	0	1	6	133.214	104.529	28.685
12	38	1	20.8429	3	0	1	1	0	0	1	131.788	103.6	28.188
12	38	1	20.8429	3	0	1	1	0	0	2	132.083	104.169	27.914
12	38	1	20.8429	3	0	1	1	0	0	3	131.64	102.73	28.91
12	38	1	20.8429	3	0	1	1	0	0	4	132.803	101.298	31.505
12	38	1	20.8429	3	0	1	1	0	0	5	133.746	101.506	32.24
12	38	1	20.8429	3	0	1	1	0	0	6	129.243	102.768	26.475
12	38	1	20.8429	3	0	1	2	1	0	1	117.917	101.015	16.902
12	38	1	20.8429	3	0	1	2	1	0	2	120.253	99.305	20.948
12	38	1	20.8429	3	0	1	2	1	0	3	121.742	99.616	22.126
12	38	1	20.8429	3	0	1	2	1	0	4	123.659	100.889	22.77
12	38	1	20.8429	3	0	1	2	1	0	5	122.903	100.489	22.414
12	38	1	20.8429	3	0	1	2	1	0	6	123.502	100.086	23.416
12	38	1	20.8429	3	0	1	3	0	1	1	134.578	105.565	29.013
12	38	1	20.8429	3	0	1	3	0	1	2	134.54	104.572	29.968
12	38	1	20.8429	3	0	1	3	0	1	3	130.819	105.308	25.511
12	38	1	20.8429	3	0	1	3	0	1	4	132.578	105.321	27.257
12	38	1	20.8429	3	0	1	3	0	1	5	133.043	105.987	27.056
12	38	1	20.8429	3	0	1	3	0	1	6	133.214	104.529	28.685
13	59	0	22.6627	1	0	0	1	0	0	1	118.299	105.44	12.859
13	59	0	22.6627	1	0	0	1	0	0	2	116.557	107.472	9.085
13	59	0	22.6627	1	0	0	1	0	0	3	115.851	106.74	9.111
13	59	0	22.6627	1	0	0	1	0	0	4	116.066	105.437	10.629
13	59	0	22.6627	1	0	0	1	0	0	5	116.456	106.088	10.368
13	59	0	22.6627	1	0	0	1	0	0	6	115.496	106.875	8.621
13	59	0	22.6627	1	0	0	2	1	0	1	114.341	105.605	8.736
13	59	0	22.6627	1	0	0	2	1	0	2	116.832	104.59	12.242
13	59	0	22.6627	1	0	0	2	1	0	3	115.028	104.374	10.654
13	59	0	22.6627	1	0	0	2	1	0	4	114.616	105.251	9.365
13	59	0	22.6627	1	0	0	2	1	0	5	115.601	105.395	10.206
13	59	0	22.6627	1	0	0	2	1	0	6	113.8	105.19	8.61
13	59	0	22.6627	1	0	0	3	0	1	1	119.046	106.976	12.07
13	59	0	22.6627	1	0	0	3	0	1	2	119.086	108.437	10.649
13	59	0	22.6627	1	0	0	3	0	1	3	121.576	108.305	13.271
13	59	0	22.6627	1	0	0	3	0	1	4	119.852	109.139	10.713
13	59	0	22.6627	1	0	0	3	0	1	5	118.749	107.194	11.555
13	59	0	22.6627	1	0	0	3	0	1	6	119.284	110.43	8.854
13	59	0	22.6627	2	1	0	1	0	0	1	128.69	111.918	16.772
13	59	0	22.6627	2	1	0	1	0	0	2	128.863	111.036	17.827
13	59	0	22.6627	2	1	0	1	0	0	3	130.742	111.03	19.712
13	59	0	22.6627	2	1	0	1	0	0	4	127.971	111.396	16.575
13	59	0	22.6627	2	1	0	1	0	0	5	128.045	111.828	16.217
13	59	0	22.6627	2	1	0	1	0	0	6	127.494	111.513	15.981
13	59	0	22.6627	2	1	0	2	1	0	1	126.252	114.84	11.412
13	59	0	22.6627	2	1	0	2	1	0	2	128.213	114.458	13.755
13	59	0	22.6627	2	1	0	2	1	0	3	126.64	114.141	12.499
13	59	0	22.6627	2	1	0	2	1	0	4	130.703	113.345	17.358
13	59	0	22.6627	2	1	0	2	1	0	5	129.126	109.488	19.638
13	59	0	22.6627	2	1	0	2	1	0	6	127.792	110.951	16.841
13	59	0	22.6627	2	1	0	3	0	1	1	121.137	106.709	14.428
13	59	0	22.6627	2	1	0	3	0	1	2	123.31	106.99	16.32
13	59	0	22.6627	2	1	0	3	0	1	3	121.496	106.188	15.308
13	59	0	22.6627	2	1	0	3	0	1	4	123.291	106.273	17.018
13	59	0	22.6627	2	1	0	3	0	1	5	122.801	105.692	17.109
13	59	0	22.6627	2	1	0	3	0	1	6	123.393	105.247	18.146
13	59	0	22.6627	3	0	1	1	0	0	1	123.065	106.776	16.289
13	59	0	22.6627	3	0	1	1	0	0	2	121.405	107.421	13.984
13	59	0	22.6627	3	0	1	1	0	0	3	119.3	107.777	11.523
13	59	0	22.6627	3	0	1	1	0	0	4	123.336	107.403	15.933
13	59	0	22.6627	3	0	1	1	0	0	5	120.211	107.866	12.345
13	59	0	22.6627	3	0	1	1	0	0	6	121.321	107.251	14.07
13	59	0	22.6627	3	0	1	2	1	0	1	121.028	111.963	9.065
13	59	0	22.6627	3	0	1	2	1	0	2	121.834	111.527	10.307
13	59	0	22.6627	3	0	1	2	1	0	3	119.914	110.365	9.549
13	59	0	22.6627	3	0	1	2	1	0	4	120.813	110.721	10.092
13	59	0	22.6627	3	0	1	2	1	0	5	122.277	109.661	12.616
13	59	0	22.6627	3	0	1	2	1	0	6	118.658	109.18	9.478
13	59	0	22.6627	3	0	1	3	0	1	1	118.988	94.68	24.308
13	59	0	22.6627	3	0	1	3	0	1	2	119.849	99.87	19.979
13	59	0	22.6627	3	0	1	3	0	1	3	120.188	90.608	29.58
13	59	0	22.6627	3	0	1	3	0	1	4	117.645	92	25.645
13	59	0	22.6627	3	0	1	3	0	1	5	115.057	91.058	23.999
13	59	0	22.6627	3	0	1	3	0	1	6	118.228	91.755	26.473
14	25	1	37.5149	1	0	0	1	0	0	1	125.283	102.128	23.155
14	25	1	37.5149	1	0	0	1	0	0	2	126.062	100.863	25.199
14	25	1	37.5149	1	0	0	1	0	0	3	125.557	100.986	24.571
14	25	1	37.5149	1	0	0	1	0	0	4	124.759	101.828	22.931
14	25	1	37.5149	1	0	0	1	0	0	5	125.019	98.762	26.257
14	25	1	37.5149	1	0	0	1	0	0	6	125.962	101.652	24.31
14	25	1	37.5149	1	0	0	2	1	0	1	121.741	98.445	23.296
14	25	1	37.5149	1	0	0	2	1	0	2	120.583	99.074	21.509
14	25	1	37.5149	1	0	0	2	1	0	3	121.828	97.352	24.476
14	25	1	37.5149	1	0	0	2	1	0	4	119.979	98.742	21.237
14	25	1	37.5149	1	0	0	2	1	0	5	121.632	97.877	23.755
14	25	1	37.5149	1	0	0	2	1	0	6	120.858	97.685	23.173
14	25	1	37.5149	1	0	0	3	0	1	1	125.677	101.352	24.325
14	25	1	37.5149	1	0	0	3	0	1	2	128.448	102.422	26.026
14	25	1	37.5149	1	0	0	3	0	1	3	128.19	115.031	13.159
14	25	1	37.5149	1	0	0	3	0	1	4	122.553	103.083	19.47
14	25	1	37.5149	1	0	0	3	0	1	5	128.507	101.112	27.395
14	25	1	37.5149	1	0	0	3	0	1	6	126.216	98.546	27.67
14	25	1	37.5149	2	1	0	1	0	0	1	132.243	107.618	24.625
14	25	1	37.5149	2	1	0	1	0	0	2	132.235	105.9	26.335
14	25	1	37.5149	2	1	0	1	0	0	3	131.721	106.198	25.523
14	25	1	37.5149	2	1	0	1	0	0	4	134.941	106.819	28.122
14	25	1	37.5149	2	1	0	1	0	0	5	133.765	107.409	26.356
14	25	1	37.5149	2	1	0	1	0	0	6	132.914	106.713	26.201
14	25	1	37.5149	2	1	0	2	1	0	1	124.997	100.094	24.903
14	25	1	37.5149	2	1	0	2	1	0	2	122.631	102.579	20.052
14	25	1	37.5149	2	1	0	2	1	0	3	123.003	101.447	21.556
14	25	1	37.5149	2	1	0	2	1	0	4	126.741	102.354	24.387
14	25	1	37.5149	2	1	0	2	1	0	5	125.052	102.31	22.742
14	25	1	37.5149	2	1	0	2	1	0	6	125.799	101.648	24.151
14	25	1	37.5149	2	1	0	3	0	1	1	130.086	98.908	31.178
14	25	1	37.5149	2	1	0	3	0	1	2	129.555	99.76	29.795
14	25	1	37.5149	2	1	0	3	0	1	3	126.972	97.55	29.422
14	25	1	37.5149	2	1	0	3	0	1	4	126.677	99.199	27.478
14	25	1	37.5149	2	1	0	3	0	1	5	123.088	98.278	24.81
14	25	1	37.5149	2	1	0	3	0	1	6	127.481	100.809	26.672
14	25	1	37.5149	3	0	1	1	0	0	1	112.164	93.801	18.363
14	25	1	37.5149	3	0	1	1	0	0	2	110.809	93.804	17.005
14	25	1	37.5149	3	0	1	1	0	0	3	108.645	93.413	15.232
14	25	1	37.5149	3	0	1	1	0	0	4	110.932	92.014	18.918
14	25	1	37.5149	3	0	1	1	0	0	5	111.096	93.606	17.49
14	25	1	37.5149	3	0	1	1	0	0	6	112.459	94.243	18.216
14	25	1	37.5149	3	0	1	2	1	0	1	118.31	96.219	22.091
14	25	1	37.5149	3	0	1	2	1	0	2	112.098	94.01	18.088
14	25	1	37.5149	3	0	1	2	1	0	3	117.925	95.389	22.536
14	25	1	37.5149	3	0	1	2	1	0	4	119.422	94.302	25.12
14	25	1	37.5149	3	0	1	2	1	0	5	120.116	94.518	25.598
14	25	1	37.5149	3	0	1	2	1	0	6	117.666	95.338	22.328
14	25	1	37.5149	3	0	1	3	0	1	1	125.455	103.334	22.121
14	25	1	37.5149	3	0	1	3	0	1	2	127.14	104.142	22.998
14	25	1	37.5149	3	0	1	3	0	1	3	124.924	102.018	22.906
14	25	1	37.5149	3	0	1	3	0	1	4	122.83	101.588	21.242
14	25	1	37.5149	3	0	1	3	0	1	5	119.358	104.578	14.78
14	25	1	37.5149	3	0	1	3	0	1	6	125.327	103.743	21.584
15	39	1	24.0138	1	0	0	1	0	0	1	121.711	100.051	21.66
15	39	1	24.0138	1	0	0	1	0	0	2	125.568	101.323	24.245
15	39	1	24.0138	1	0	0	1	0	0	3	127.044	100.559	26.485
15	39	1	24.0138	1	0	0	1	0	0	4	124.103	99.593	24.51
15	39	1	24.0138	1	0	0	1	0	0	5	127.069	100.966	26.103
15	39	1	24.0138	1	0	0	1	0	0	6	125.315	100.942	24.373
15	39	1	24.0138	1	0	0	2	1	0	1	123.183	102.519	20.664
15	39	1	24.0138	1	0	0	2	1	0	2	124.378	101.288	23.09
15	39	1	24.0138	1	0	0	2	1	0	3	125.92	100.734	25.186
15	39	1	24.0138	1	0	0	2	1	0	4	124.848	100.948	23.9
15	39	1	24.0138	1	0	0	2	1	0	5	124.272	101.449	22.823
15	39	1	24.0138	1	0	0	2	1	0	6	124.992	100.603	24.389
15	39	1	24.0138	1	0	0	3	0	1	1	128.981	103.088	25.893
15	39	1	24.0138	1	0	0	3	0	1	2	132.091	106.163	25.928
15	39	1	24.0138	1	0	0	3	0	1	3	134.468	106.343	28.125
15	39	1	24.0138	1	0	0	3	0	1	4	137.292	105.118	32.174
15	39	1	24.0138	1	0	0	3	0	1	5	131.705	104.804	26.901
15	39	1	24.0138	1	0	0	3	0	1	6	131.426	103.77	27.656
15	39	1	24.0138	2	1	0	1	0	0	1	139.61	108.309	31.301
15	39	1	24.0138	2	1	0	1	0	0	2	139.137	110.158	28.979
15	39	1	24.0138	2	1	0	1	0	0	3	139.971	110.077	29.894
15	39	1	24.0138	2	1	0	1	0	0	4	140.126	108.781	31.345
15	39	1	24.0138	2	1	0	1	0	0	5	139.879	109.038	30.841
15	39	1	24.0138	2	1	0	1	0	0	6	138.517	109.402	29.115
15	39	1	24.0138	2	1	0	2	1	0	1
15	39	1	24.0138	2	1	0	2	1	0	2
15	39	1	24.0138	2	1	0	2	1	0	3
15	39	1	24.0138	2	1	0	2	1	0	4
15	39	1	24.0138	2	1	0	2	1	0	5
15	39	1	24.0138	2	1	0	2	1	0	6
15	39	1	24.0138	2	1	0	3	0	1	1	139.816	112.054	27.762
15	39	1	24.0138	2	1	0	3	0	1	2	138.335	112.528	25.807
15	39	1	24.0138	2	1	0	3	0	1	3	141.102	114.945	26.157
15	39	1	24.0138	2	1	0	3	0	1	4	141.419	111.572	29.847
15	39	1	24.0138	2	1	0	3	0	1	5	136.792	113.071	23.721
15	39	1	24.0138	2	1	0	3	0	1	6	139.576	112.754	26.822
15	39	1	24.0138	3	0	1	1	0	0	1	131.661	105.767	25.894
15	39	1	24.0138	3	0	1	1	0	0	2	131.247	102.501	28.746
15	39	1	24.0138	3	0	1	1	0	0	3	131.999	103.821	28.178
15	39	1	24.0138	3	0	1	1	0	0	4	130.899	103.427	27.472
15	39	1	24.0138	3	0	1	1	0	0	5	129.577	102.384	27.193
15	39	1	24.0138	3	0	1	1	0	0	6	130.296	104.305	25.991
15	39	1	24.0138	3	0	1	2	1	0	1	125.021	102.607	22.414
15	39	1	24.0138	3	0	1	2	1	0	2	125.904	102.464	23.44
15	39	1	24.0138	3	0	1	2	1	0	3	124.946	103.088	21.858
15	39	1	24.0138	3	0	1	2	1	0	4	128.317	101.62	26.697
15	39	1	24.0138	3	0	1	2	1	0	5	127.392	102.683	24.709
15	39	1	24.0138	3	0	1	2	1	0	6	125.538	102.354	23.184
15	39	1	24.0138	3	0	1	3	0	1	1	138.662	113.164	25.498
15	39	1	24.0138	3	0	1	3	0	1	2	137.993	112.976	25.017
15	39	1	24.0138	3	0	1	3	0	1	3	136.44	112.032	24.408
15	39	1	24.0138	3	0	1	3	0	1	4	138.874	112.646	26.228
15	39	1	24.0138	3	0	1	3	0	1	5	139.116	111.752	27.364
15	39	1	24.0138	3	0	1	3	0	1	6	138.932	111.983	26.949
16	46	0	29.3524	1	0	0	1	0	0	1	129.599	107.791	21.808
16	46	0	29.3524	1	0	0	1	0	0	2	125.339	106.773	18.566
16	46	0	29.3524	1	0	0	1	0	0	3	124.129	107.397	16.732
16	46	0	29.3524	1	0	0	1	0	0	4	129.419	107.553	21.866
16	46	0	29.3524	1	0	0	1	0	0	5	130.726	108.87	21.856
16	46	0	29.3524	1	0	0	1	0	0	6	129.153	106.678	22.475
16	46	0	29.3524	1	0	0	2	1	0	1	125.845	106.102	19.743
16	46	0	29.3524	1	0	0	2	1	0	2	125.87	106.391	19.479
16	46	0	29.3524	1	0	0	2	1	0	3	124.508	104.399	20.109
16	46	0	29.3524	1	0	0	2	1	0	4	126.033	102.273	23.76
16	46	0	29.3524	1	0	0	2	1	0	5	125.18	104.385	20.795
16	46	0	29.3524	1	0	0	2	1	0	6	124.403	106.236	18.167
16	46	0	29.3524	1	0	0	3	0	1	1	129.9	106.813	23.087
16	46	0	29.3524	1	0	0	3	0	1	2	129.178	105.611	23.567
16	46	0	29.3524	1	0	0	3	0	1	3	128.744	107.348	21.396
16	46	0	29.3524	1	0	0	3	0	1	4	131.462	106.668	24.794
16	46	0	29.3524	1	0	0	3	0	1	5	134.87	107.418	27.452
16	46	0	29.3524	1	0	0	3	0	1	6	132.012	104.821	27.191
16	46	0	29.3524	2	1	0	1	0	0	1	138.134	113.164	24.97
16	46	0	29.3524	2	1	0	1	0	0	2	138.941	110.991	27.95
16	46	0	29.3524	2	1	0	1	0	0	3	134.25	112.388	21.862
16	46	0	29.3524	2	1	0	1	0	0	4	138.022	111.52	26.502
16	46	0	29.3524	2	1	0	1	0	0	5	135.968	112.516	23.452
16	46	0	29.3524	2	1	0	1	0	0	6	139.681	113.092	26.589
16	46	0	29.3524	2	1	0	2	1	0	1	131.433	108.573	22.86
16	46	0	29.3524	2	1	0	2	1	0	2	130.341	108.458	21.883
16	46	0	29.3524	2	1	0	2	1	0	3	130.992	107.744	23.248
16	46	0	29.3524	2	1	0	2	1	0	4	133.67	107.758	25.912
16	46	0	29.3524	2	1	0	2	1	0	5	130.993	108.311	22.682
16	46	0	29.3524	2	1	0	2	1	0	6	131.604	108.468	23.136
16	46	0	29.3524	2	1	0	3	0	1	1	139.52	114.045	25.475
16	46	0	29.3524	2	1	0	3	0	1	2	135.408	114.596	20.812
16	46	0	29.3524	2	1	0	3	0	1	3	137.088	114.628	22.46
16	46	0	29.3524	2	1	0	3	0	1	4	135.719	114.05	21.669
16	46	0	29.3524	2	1	0	3	0	1	5	137.893	114.771	23.122
16	46	0	29.3524	2	1	0	3	0	1	6	137.768	114.926	22.842
16	46	0	29.3524	3	0	1	1	0	0	1	126.83	106.866	19.964
16	46	0	29.3524	3	0	1	1	0	0	2	127.904	106.64	21.264
16	46	0	29.3524	3	0	1	1	0	0	3	125.358	107.139	18.219
16	46	0	29.3524	3	0	1	1	0	0	4	128.759	107.309	21.45
16	46	0	29.3524	3	0	1	1	0	0	5	106.77	108.372	1.602
16	46	0	29.3524	3	0	1	1	0	0	6	129.898	109.021	20.877
16	46	0	29.3524	3	0	1	2	1	0	1	134.994	109.314	25.68
16	46	0	29.3524	3	0	1	2	1	0	2	132.402	110.06	22.342
16	46	0	29.3524	3	0	1	2	1	0	3	132.394	111.04	21.354
16	46	0	29.3524	3	0	1	2	1	0	4	130.873	111.878	18.995
16	46	0	29.3524	3	0	1	2	1	0	5	130.739	109.864	20.875
16	46	0	29.3524	3	0	1	2	1	0	6	134.226	108.069	26.157
16	46	0	29.3524	3	0	1	3	0	1	1	132.043	111.457	20.586
16	46	0	29.3524	3	0	1	3	0	1	2	133.926	111.534	22.392
16	46	0	29.3524	3	0	1	3	0	1	3	134.041	108.289	25.752
16	46	0	29.3524	3	0	1	3	0	1	4	133.474	111.066	22.408
16	46	0	29.3524	3	0	1	3	0	1	5	133.053	110.56	22.493
16	46	0	29.3524	3	0	1	3	0	1	6	134.548	110.137	24.411
17	20	1	19.3294	1	0	0	1	0	0	1	125.067	97.283	27.784
17	20	1	19.3294	1	0	0	1	0	0	2	123.571	97.101	26.47
17	20	1	19.3294	1	0	0	1	0	0	3	123.199	97.495	25.704
17	20	1	19.3294	1	0	0	1	0	0	4	124.43	97.107	27.323
17	20	1	19.3294	1	0	0	1	0	0	5	119.578	97.444	22.134
17	20	1	19.3294	1	0	0	1	0	0	6	123.404	96.754	26.65
17	20	1	19.3294	1	0	0	2	1	0	1	125.735	103.471	22.264
17	20	1	19.3294	1	0	0	2	1	0	2	128.569	104.86	23.709
17	20	1	19.3294	1	0	0	2	1	0	3	127.083	102.825	24.258
17	20	1	19.3294	1	0	0	2	1	0	4	126.508	104.664	21.844
17	20	1	19.3294	1	0	0	2	1	0	5	126.621	104.481	22.14
17	20	1	19.3294	1	0	0	2	1	0	6	127.09	104.594	22.496
17	20	1	19.3294	1	0	0	3	0	1	1	128.46	98.155	30.305
17	20	1	19.3294	1	0	0	3	0	1	2	125.282	96.978	28.304
17	20	1	19.3294	1	0	0	3	0	1	3	122.758	98.529	24.229
17	20	1	19.3294	1	0	0	3	0	1	4	129.235	98.274	30.961
17	20	1	19.3294	1	0	0	3	0	1	5	126.543	97.308	29.235
17	20	1	19.3294	1	0	0	3	0	1	6	126.358	98.311	28.047
17	20	1	19.3294	2	1	0	1	0	0	1	122.198	101.575	20.623
17	20	1	19.3294	2	1	0	1	0	0	2	120.835	103.191	17.644
17	20	1	19.3294	2	1	0	1	0	0	3	122.038	101.406	20.632
17	20	1	19.3294	2	1	0	1	0	0	4	124.947	102.619	22.328
17	20	1	19.3294	2	1	0	1	0	0	5	125.312	101.773	23.539
17	20	1	19.3294	2	1	0	1	0	0	6	129.096	101.967	27.129
17	20	1	19.3294	2	1	0	2	1	0	1
17	20	1	19.3294	2	1	0	2	1	0	2
17	20	1	19.3294	2	1	0	2	1	0	3
17	20	1	19.3294	2	1	0	2	1	0	4
17	20	1	19.3294	2	1	0	2	1	0	5
17	20	1	19.3294	2	1	0	2	1	0	6
17	20	1	19.3294	2	1	0	3	0	1	1	132.153	105.034	27.119
17	20	1	19.3294	2	1	0	3	0	1	2	135.733	102.267	33.466
17	20	1	19.3294	2	1	0	3	0	1	3	133.35	104.301	29.049
17	20	1	19.3294	2	1	0	3	0	1	4	133.195	104.413	28.782
17	20	1	19.3294	2	1	0	3	0	1	5	135.589	103.567	32.022
17	20	1	19.3294	2	1	0	3	0	1	6	133.098	103.261	29.837
17	20	1	19.3294	3	0	1	1	0	0	1	121.459	100.226	21.233
17	20	1	19.3294	3	0	1	1	0	0	2	119.195	99.456	19.739
17	20	1	19.3294	3	0	1	1	0	0	3	124.838	99.115	25.723
17	20	1	19.3294	3	0	1	1	0	0	4	123.729	98.931	24.798
17	20	1	19.3294	3	0	1	1	0	0	5	125.461	100.001	25.46
17	20	1	19.3294	3	0	1	1	0	0	6	122.733	99.617	23.116
17	20	1	19.3294	3	0	1	2	1	0	1	127.479	103.729	23.75
17	20	1	19.3294	3	0	1	2	1	0	2	128.36	104.762	23.598
17	20	1	19.3294	3	0	1	2	1	0	3	125.418	102.5	22.918
17	20	1	19.3294	3	0	1	2	1	0	4	126.182	103.826	22.356
17	20	1	19.3294	3	0	1	2	1	0	5	125.827	104.563	21.264
17	20	1	19.3294	3	0	1	2	1	0	6	127.71	104.603	23.107
17	20	1	19.3294	3	0	1	3	0	1	1	125.722	99.213	26.509
17	20	1	19.3294	3	0	1	3	0	1	2	120.361	96.625	23.736
17	20	1	19.3294	3	0	1	3	0	1	3	123.26	99.359	23.901
17	20	1	19.3294	3	0	1	3	0	1	4	123.598	101.248	22.35
17	20	1	19.3294	3	0	1	3	0	1	5	125.256	98.139	27.117
17	20	1	19.3294	3	0	1	3	0	1	6	125.488	98.146	27.342
18	29	0	27.4361	1	0	0	1	0	0	1	136.76	109.807	26.953
18	29	0	27.4361	1	0	0	1	0	0	2	131.998	111.335	20.663
18	29	0	27.4361	1	0	0	1	0	0	3	135.806	110.186	25.62
18	29	0	27.4361	1	0	0	1	0	0	4	132.81	111.502	21.308
18	29	0	27.4361	1	0	0	1	0	0	5	133.094	111.766	21.328
18	29	0	27.4361	1	0	0	1	0	0	6	134.345	111.528	22.817
18	29	0	27.4361	1	0	0	2	1	0	1	130.298	111.155	19.143
18	29	0	27.4361	1	0	0	2	1	0	2	128.024	110.132	17.892
18	29	0	27.4361	1	0	0	2	1	0	3	127.152	108.553	18.599
18	29	0	27.4361	1	0	0	2	1	0	4	122.811	112.274	10.537
18	29	0	27.4361	1	0	0	2	1	0	5	130.244	109.886	20.358
18	29	0	27.4361	1	0	0	2	1	0	6	126.38	109.591	16.789
18	29	0	27.4361	1	0	0	3	0	1	1	126.858	103.395	23.463
18	29	0	27.4361	1	0	0	3	0	1	2	127.281	104.357	22.924
18	29	0	27.4361	1	0	0	3	0	1	3	124.812	105.462	19.35
18	29	0	27.4361	1	0	0	3	0	1	4	130.036	104.726	25.31
18	29	0	27.4361	1	0	0	3	0	1	5	129.06	107.33	21.73
18	29	0	27.4361	1	0	0	3	0	1	6	130.333	104.976	25.357
18	29	0	27.4361	2	1	0	1	0	0	1	140.173	107.02	33.153
18	29	0	27.4361	2	1	0	1	0	0	2	139.012	108.569	30.443
18	29	0	27.4361	2	1	0	1	0	0	3	138.745	107.654	31.091
18	29	0	27.4361	2	1	0	1	0	0	4	138.357	108.41	29.947
18	29	0	27.4361	2	1	0	1	0	0	5	137.989	105.426	32.563
18	29	0	27.4361	2	1	0	1	0	0	6	136.611	103.82	32.791
18	29	0	27.4361	2	1	0	2	1	0	1	130.069	104.713	25.356
18	29	0	27.4361	2	1	0	2	1	0	2	129.941	106.152	23.789
18	29	0	27.4361	2	1	0	2	1	0	3	133.541	101.266	32.275
18	29	0	27.4361	2	1	0	2	1	0	4	128.652	100.897	27.755
18	29	0	27.4361	2	1	0	2	1	0	5	131.018	105.126	25.892
18	29	0	27.4361	2	1	0	2	1	0	6	132.308	103.245	29.063
18	29	0	27.4361	2	1	0	3	0	1	1	133.555	100.51	33.045
18	29	0	27.4361	2	1	0	3	0	1	2	133.858	111.779	22.079
18	29	0	27.4361	2	1	0	3	0	1	3	135.28	98.474	36.806
18	29	0	27.4361	2	1	0	3	0	1	4	133.62	100.472	33.148
18	29	0	27.4361	2	1	0	3	0	1	5	133.044	100.249	32.795
18	29	0	27.4361	2	1	0	3	0	1	6	134.974	99.162	35.812
18	29	0	27.4361	3	0	1	1	0	0	1	134.839	107.489	27.35
18	29	0	27.4361	3	0	1	1	0	0	2	134.497	106.483	28.014
18	29	0	27.4361	3	0	1	1	0	0	3	133.336	108.469	24.867
18	29	0	27.4361	3	0	1	1	0	0	4	135.78	104.804	30.976
18	29	0	27.4361	3	0	1	1	0	0	5	132.651	107.421	25.23
18	29	0	27.4361	3	0	1	1	0	0	6	132.797	105.886	26.911
18	29	0	27.4361	3	0	1	2	1	0	1	133.794	111.579	22.215
18	29	0	27.4361	3	0	1	2	1	0	2	135.024	107.943	27.081
18	29	0	27.4361	3	0	1	2	1	0	3	133.052	108.723	24.329
18	29	0	27.4361	3	0	1	2	1	0	4	132.771	109.73	23.041
18	29	0	27.4361	3	0	1	2	1	0	5	133.569	109.754	23.815
18	29	0	27.4361	3	0	1	2	1	0	6	133.598	107.377	26.221
18	29	0	27.4361	3	0	1	3	0	1	1	134.393	110.378	24.015
18	29	0	27.4361	3	0	1	3	0	1	2	135.73	111.142	24.588
18	29	0	27.4361	3	0	1	3	0	1	3	132.455	108.018	24.437
18	29	0	27.4361	3	0	1	3	0	1	4	133.409	108.641	24.768
18	29	0	27.4361	3	0	1	3	0	1	5	130.597	108.732	21.865
18	29	0	27.4361	3	0	1	3	0	1	6	132.004	111.471	20.533
19	33	1	30.0947	1	0	0	1	0	0	1	130.746	109.543	21.203
19	33	1	30.0947	1	0	0	1	0	0	2	132.938	110.317	22.621
19	33	1	30.0947	1	0	0	1	0	0	3	138.489	110.952	27.537
19	33	1	30.0947	1	0	0	1	0	0	4	139.57	109.415	30.155
19	33	1	30.0947	1	0	0	1	0	0	5	137.739	109.599	28.14
19	33	1	30.0947	1	0	0	1	0	0	6	135.127	108.933	26.194
19	33	1	30.0947	1	0	0	2	1	0	1	136.169	110.076	26.093
19	33	1	30.0947	1	0	0	2	1	0	2	136.489	109.286	27.203
19	33	1	30.0947	1	0	0	2	1	0	3	137.628	110.027	27.601
19	33	1	30.0947	1	0	0	2	1	0	4	134.546	110.281	24.265
19	33	1	30.0947	1	0	0	2	1	0	5	135.396	110.367	25.029
19	33	1	30.0947	1	0	0	2	1	0	6	134.096	110.275	23.821
19	33	1	30.0947	1	0	0	3	0	1	1	132.39	98.62	33.77
19	33	1	30.0947	1	0	0	3	0	1	2	131.241	97.239	34.002
19	33	1	30.0947	1	0	0	3	0	1	3	127.852	98.22	29.632
19	33	1	30.0947	1	0	0	3	0	1	4	125.556	98.943	26.613
19	33	1	30.0947	1	0	0	3	0	1	5	129.894	98.264	31.63
19	33	1	30.0947	1	0	0	3	0	1	6	129.194	98.133	31.061
19	33	1	30.0947	2	1	0	1	0	0	1	128.969	103.936	25.033
19	33	1	30.0947	2	1	0	1	0	0	2	131.142	102.873	28.269
19	33	1	30.0947	2	1	0	1	0	0	3	132.678	103.288	29.39
19	33	1	30.0947	2	1	0	1	0	0	4	129.56	104.199	25.361
19	33	1	30.0947	2	1	0	1	0	0	5	133.861	103.082	30.779
19	33	1	30.0947	2	1	0	1	0	0	6	128.752	102.59	26.162
19	33	1	30.0947	2	1	0	2	1	0	1
19	33	1	30.0947	2	1	0	2	1	0	2
19	33	1	30.0947	2	1	0	2	1	0	3
19	33	1	30.0947	2	1	0	2	1	0	4
19	33	1	30.0947	2	1	0	2	1	0	5
19	33	1	30.0947	2	1	0	2	1	0	6
19	33	1	30.0947	2	1	0	3	0	1	1	140.553	112.29	28.263
19	33	1	30.0947	2	1	0	3	0	1	2	144.483	112.448	32.035
19	33	1	30.0947	2	1	0	3	0	1	3	143.442	112.278	31.164
19	33	1	30.0947	2	1	0	3	0	1	4	141.725	112.806	28.919
19	33	1	30.0947	2	1	0	3	0	1	5	112.04	111.853	0.187
19	33	1	30.0947	2	1	0	3	0	1	6	138.986	110.267	28.719
19	33	1	30.0947	3	0	1	1	0	0	1	121.027	100.64	20.387
19	33	1	30.0947	3	0	1	1	0	0	2	119.478	100.044	19.434
19	33	1	30.0947	3	0	1	1	0	0	3	120.78	101.157	19.623
19	33	1	30.0947	3	0	1	1	0	0	4	121.893	101.541	20.352
19	33	1	30.0947	3	0	1	1	0	0	5	121.787	101.874	19.913
19	33	1	30.0947	3	0	1	1	0	0	6	122.981	101.248	21.733
19	33	1	30.0947	3	0	1	2	1	0	1	138.378	133.095	5.283
19	33	1	30.0947	3	0	1	2	1	0	2	139.299	113.079	26.22
19	33	1	30.0947	3	0	1	2	1	0	3	139.391	112.197	27.194
19	33	1	30.0947	3	0	1	2	1	0	4	139.378	112.71	26.668
19	33	1	30.0947	3	0	1	2	1	0	5	139.908	114.238	25.67
19	33	1	30.0947	3	0	1	2	1	0	6	138.116	114.75	23.366
19	33	1	30.0947	3	0	1	3	0	1	1	129.643	105.783	23.86
19	33	1	30.0947	3	0	1	3	0	1	2	130.572	105.953	24.619
19	33	1	30.0947	3	0	1	3	0	1	3	131.186	105.097	26.089
19	33	1	30.0947	3	0	1	3	0	1	4	131.81	104.152	27.658
19	33	1	30.0947	3	0	1	3	0	1	5	131.617	104.61	27.007
19	33	1	30.0947	3	0	1	3	0	1	6	133.233	104.232	29.001
20	40	0	22.3863	1	0	0	1	0	0	1	123.253	97.188	26.065
20	40	0	22.3863	1	0	0	1	0	0	2	121.454	98.185	23.269
20	40	0	22.3863	1	0	0	1	0	0	3	122.964	98.068	24.896
20	40	0	22.3863	1	0	0	1	0	0	4	125.06	97.791	27.269
20	40	0	22.3863	1	0	0	1	0	0	5	122.651	96.782	25.869
20	40	0	22.3863	1	0	0	1	0	0	6	125.729	97.97	27.759
20	40	0	22.3863	1	0	0	2	1	0	1	132.031	104.097	27.934
20	40	0	22.3863	1	0	0	2	1	0	2	122.303	104.064	18.239
20	40	0	22.3863	1	0	0	2	1	0	3	122.914	105.033	17.881
20	40	0	22.3863	1	0	0	2	1	0	4	125.889	103.434	22.455
20	40	0	22.3863	1	0	0	2	1	0	5	125.12	104.627	20.493
20	40	0	22.3863	1	0	0	2	1	0	6	127.484	103.71	23.774
20	40	0	22.3863	1	0	0	3	0	1	1	126.703	100.65	26.053
20	40	0	22.3863	1	0	0	3	0	1	2	123.963	101.508	22.455
20	40	0	22.3863	1	0	0	3	0	1	3	125.625	101.263	24.362
20	40	0	22.3863	1	0	0	3	0	1	4	126.075	100.928	25.147
20	40	0	22.3863	1	0	0	3	0	1	5	125.987	100.787	25.2
20	40	0	22.3863	1	0	0	3	0	1	6	125.302	100.65	24.652
20	40	0	22.3863	2	1	0	1	0	0	1	131.81	97.677	34.133
20	40	0	22.3863	2	1	0	1	0	0	2	130.439	97.751	32.688
20	40	0	22.3863	2	1	0	1	0	0	3	131.302	99.732	31.57
20	40	0	22.3863	2	1	0	1	0	0	4	135.81	98.056	37.754
20	40	0	22.3863	2	1	0	1	0	0	5	131.122	98.319	32.803
20	40	0	22.3863	2	1	0	1	0	0	6	131.825	98.005	33.82
20	40	0	22.3863	2	1	0	2	1	0	1	129.373	102.272	27.101
20	40	0	22.3863	2	1	0	2	1	0	2	129.646	102.64	27.006
20	40	0	22.3863	2	1	0	2	1	0	3	131.184	101.606	29.578
20	40	0	22.3863	2	1	0	2	1	0	4	125.777	102.215	23.562
20	40	0	22.3863	2	1	0	2	1	0	5	129.052	102.785	26.267
20	40	0	22.3863	2	1	0	2	1	0	6	131.165	102.341	28.824
20	40	0	22.3863	2	1	0	3	0	1	1	133.115	103.221	29.894
20	40	0	22.3863	2	1	0	3	0	1	2	134.116	102.412	31.704
20	40	0	22.3863	2	1	0	3	0	1	3	133.474	102.734	30.74
20	40	0	22.3863	2	1	0	3	0	1	4	135.485	102.476	33.009
20	40	0	22.3863	2	1	0	3	0	1	5	133.949	102.95	30.999
20	40	0	22.3863	2	1	0	3	0	1	6	132.583	102.855	29.728
20	40	0	22.3863	3	0	1	1	0	0	1	126.556	103.795	22.761
20	40	0	22.3863	3	0	1	1	0	0	2	128.079	102.538	25.541
20	40	0	22.3863	3	0	1	1	0	0	3	127.517	102.995	24.522
20	40	0	22.3863	3	0	1	1	0	0	4	126.97	101.906	25.064
20	40	0	22.3863	3	0	1	1	0	0	5	125.254	103.597	21.657
20	40	0	22.3863	3	0	1	1	0	0	6	127.316	101.586	25.73
20	40	0	22.3863	3	0	1	2	1	0	1	126.925	103.874	23.051
20	40	0	22.3863	3	0	1	2	1	0	2	127.08	105.096	21.984
20	40	0	22.3863	3	0	1	2	1	0	3	127.026	103.585	23.441
20	40	0	22.3863	3	0	1	2	1	0	4	124.06	104.636	19.424
20	40	0	22.3863	3	0	1	2	1	0	5	127.46	104.004	23.456
20	40	0	22.3863	3	0	1	2	1	0	6	126.217	103.551	22.666
20	40	0	22.3863	3	0	1	3	0	1	1	128.899	104.945	23.954
20	40	0	22.3863	3	0	1	3	0	1	2	130.67	103.831	26.839
20	40	0	22.3863	3	0	1	3	0	1	3	128.931	104.361	24.57
20	40	0	22.3863	3	0	1	3	0	1	4	129.835	104.102	25.733
20	40	0	22.3863	3	0	1	3	0	1	5	128.799	103.755	25.044
20	40	0	22.3863	3	0	1	3	0	1	6	129.462	104.031	25.431
21	21	1	21.9213	1	0	0	1	0	0	1	142.448	94.994	47.454
21	21	1	21.9213	1	0	0	1	0	0	2	138.25	93.693	44.557
21	21	1	21.9213	1	0	0	1	0	0	3	120.835	95.117	25.718
21	21	1	21.9213	1	0	0	1	0	0	4	132.056	97.339	34.717
21	21	1	21.9213	1	0	0	1	0	0	5	143.178	95.401	47.777
21	21	1	21.9213	1	0	0	1	0	0	6	140.439	96.71	43.729
21	21	1	21.9213	1	0	0	2	1	0	1	132.457	101.61	30.847
21	21	1	21.9213	1	0	0	2	1	0	2	134.596	104.852	29.744
21	21	1	21.9213	1	0	0	2	1	0	3	129.916	102.556	27.36
21	21	1	21.9213	1	0	0	2	1	0	4	131.505	101.901	29.604
21	21	1	21.9213	1	0	0	2	1	0	5	135.72	102.748	32.972
21	21	1	21.9213	1	0	0	2	1	0	6	133.755	102.49	31.265
21	21	1	21.9213	1	0	0	3	0	1	1	131.158	95.534	35.624
21	21	1	21.9213	1	0	0	3	0	1	2	137.667	95.29	42.377
21	21	1	21.9213	1	0	0	3	0	1	3	130.379	97.041	33.338
21	21	1	21.9213	1	0	0	3	0	1	4	125.301	104.882	20.419
21	21	1	21.9213	1	0	0	3	0	1	5	132.11	93.695	38.415
21	21	1	21.9213	1	0	0	3	0	1	6	132.977	93.106	39.871
21	21	1	21.9213	2	1	0	1	0	0	1	131.489	101.154	30.335
21	21	1	21.9213	2	1	0	1	0	0	2	123.384	101.309	22.075
21	21	1	21.9213	2	1	0	1	0	0	3	122.433	102.031	20.402
21	21	1	21.9213	2	1	0	1	0	0	4	132.739	102.487	30.252
21	21	1	21.9213	2	1	0	1	0	0	5	135.328	101.609	33.719
21	21	1	21.9213	2	1	0	1	0	0	6	142.547	100.942	41.605
21	21	1	21.9213	2	1	0	2	1	0	1
21	21	1	21.9213	2	1	0	2	1	0	2
21	21	1	21.9213	2	1	0	2	1	0	3
21	21	1	21.9213	2	1	0	2	1	0	4
21	21	1	21.9213	2	1	0	2	1	0	5
21	21	1	21.9213	2	1	0	2	1	0	6
21	21	1	21.9213	2	1	0	3	0	1	1	135.965	100.825	35.14
21	21	1	21.9213	2	1	0	3	0	1	2	135.977	102.082	33.895
21	21	1	21.9213	2	1	0	3	0	1	3	140.04	102.827	37.213
21	21	1	21.9213	2	1	0	3	0	1	4	142.929	97.254	45.675
21	21	1	21.9213	2	1	0	3	0	1	5	143.53	100.115	43.415
21	21	1	21.9213	2	1	0	3	0	1	6	138.041	98.738	39.303
21	21	1	21.9213	3	0	1	1	0	0	1	134.649	104.515	30.134
21	21	1	21.9213	3	0	1	1	0	0	2	135.118	102.6	32.518
21	21	1	21.9213	3	0	1	1	0	0	3	132.114	101.525	30.589
21	21	1	21.9213	3	0	1	1	0	0	4	129.395	102.774	26.621
21	21	1	21.9213	3	0	1	1	0	0	5	137.838	105.259	32.579
21	21	1	21.9213	3	0	1	1	0	0	6	128.354	105.324	23.03
21	21	1	21.9213	3	0	1	2	1	0	1	129.68	113.16	16.52
21	21	1	21.9213	3	0	1	2	1	0	2	136.516	114.353	22.163
21	21	1	21.9213	3	0	1	2	1	0	3	136.004	112.733	23.271
21	21	1	21.9213	3	0	1	2	1	0	4	135.59	114.076	21.514
21	21	1	21.9213	3	0	1	2	1	0	5	130.427	113.521	16.906
21	21	1	21.9213	3	0	1	2	1	0	6	132.394	112.688	19.706
21	21	1	21.9213	3	0	1	3	0	1	1	129.285	101.71	27.575
21	21	1	21.9213	3	0	1	3	0	1	2	131.134	106.025	25.109
21	21	1	21.9213	3	0	1	3	0	1	3	136.421	101.944	34.477
21	21	1	21.9213	3	0	1	3	0	1	4	138.585	102.681	35.904
21	21	1	21.9213	3	0	1	3	0	1	5	132.078	104.429	27.649
21	21	1	21.9213	3	0	1	3	0	1	6	135.332	106.759	28.573
22	30	1	22.8624	1	0	0	1	0	0	1
22	30	1	22.8624	1	0	0	1	0	0	2
22	30	1	22.8624	1	0	0	1	0	0	3
22	30	1	22.8624	1	0	0	1	0	0	4
22	30	1	22.8624	1	0	0	1	0	0	5
22	30	1	22.8624	1	0	0	1	0	0	6
22	30	1	22.8624	1	0	0	2	1	0	1
22	30	1	22.8624	1	0	0	2	1	0	2
22	30	1	22.8624	1	0	0	2	1	0	3
22	30	1	22.8624	1	0	0	2	1	0	4
22	30	1	22.8624	1	0	0	2	1	0	5
22	30	1	22.8624	1	0	0	2	1	0	6
22	30	1	22.8624	1	0	0	3	0	1	1
22	30	1	22.8624	1	0	0	3	0	1	2
22	30	1	22.8624	1	0	0	3	0	1	3
22	30	1	22.8624	1	0	0	3	0	1	4
22	30	1	22.8624	1	0	0	3	0	1	5
22	30	1	22.8624	1	0	0	3	0	1	6
22	30	1	22.8624	2	1	0	1	0	0	1	139.275	111.124	28.151
22	30	1	22.8624	2	1	0	1	0	0	2	141.81	110.429	31.381
22	30	1	22.8624	2	1	0	1	0	0	3	140.758	110.554	30.204
22	30	1	22.8624	2	1	0	1	0	0	4	141.498	110.201	31.297
22	30	1	22.8624	2	1	0	1	0	0	5	143.096	109.87	33.226
22	30	1	22.8624	2	1	0	1	0	0	6	139.719	108.371	31.348
22	30	1	22.8624	2	1	0	2	1	0	1	140.369	109.94	30.429
22	30	1	22.8624	2	1	0	2	1	0	2	138.72	109.31	29.41
22	30	1	22.8624	2	1	0	2	1	0	3	138.622	107.997	30.625
22	30	1	22.8624	2	1	0	2	1	0	4	137.803	112.042	25.761
22	30	1	22.8624	2	1	0	2	1	0	5	138.401	110.722	27.679
22	30	1	22.8624	2	1	0	2	1	0	6	138.527	110.125	28.402
22	30	1	22.8624	2	1	0	3	0	1	1	141.526	112.931	28.595
22	30	1	22.8624	2	1	0	3	0	1	2	141.307	112.635	28.672
22	30	1	22.8624	2	1	0	3	0	1	3	141.034	112.163	28.871
22	30	1	22.8624	2	1	0	3	0	1	4	140.015	112.695	27.32
22	30	1	22.8624	2	1	0	3	0	1	5	142.974	112.124	30.85
22	30	1	22.8624	2	1	0	3	0	1	6	141.59	111.569	30.021
22	30	1	22.8624	3	0	1	1	0	0	1	139.548	111.631	27.917
22	30	1	22.8624	3	0	1	1	0	0	2	142.261	111.43	30.831
22	30	1	22.8624	3	0	1	1	0	0	3	142.081	111.391	30.69
22	30	1	22.8624	3	0	1	1	0	0	4	139.038	112.341	26.697
22	30	1	22.8624	3	0	1	1	0	0	5	143.07	112.203	30.867
22	30	1	22.8624	3	0	1	1	0	0	6	141.01	113.457	27.553
22	30	1	22.8624	3	0	1	2	1	0	1	138.398	109.766	28.632
22	30	1	22.8624	3	0	1	2	1	0	2	138.695	109.65	29.045
22	30	1	22.8624	3	0	1	2	1	0	3	142.64	110.746	31.894
22	30	1	22.8624	3	0	1	2	1	0	4	136.351	109.831	26.52
22	30	1	22.8624	3	0	1	2	1	0	5	138.948	109.776	29.172
22	30	1	22.8624	3	0	1	2	1	0	6	138.145	110.927	27.218
22	30	1	22.8624	3	0	1	3	0	1	1	141.697	111.788	29.909
22	30	1	22.8624	3	0	1	3	0	1	2	141.738	112.832	28.906
22	30	1	22.8624	3	0	1	3	0	1	3	138.78	110.922	27.858
22	30	1	22.8624	3	0	1	3	0	1	4	138.777	111.174	27.603
22	30	1	22.8624	3	0	1	3	0	1	5	139.113	110.992	28.121
22	30	1	22.8624	3	0	1	3	0	1	6	141.774	110.645	31.129
23	36	1	32.4886	1	0	0	1	0	0	1	130.46	113.802	16.658
23	36	1	32.4886	1	0	0	1	0	0	2	133.294	112.241	21.053
23	36	1	32.4886	1	0	0	1	0	0	3	132.465	114.114	18.351
23	36	1	32.4886	1	0	0	1	0	0	4	128.897	112.802	16.095
23	36	1	32.4886	1	0	0	1	0	0	5	132.734	113.627	19.107
23	36	1	32.4886	1	0	0	1	0	0	6	135.031	113.518	21.513
23	36	1	32.4886	1	0	0	2	1	0	1	141.84	113.024	28.816
23	36	1	32.4886	1	0	0	2	1	0	2	140.534	115.101	25.433
23	36	1	32.4886	1	0	0	2	1	0	3	142.164	114.104	28.06
23	36	1	32.4886	1	0	0	2	1	0	4	142.229	113.824	28.405
23	36	1	32.4886	1	0	0	2	1	0	5	143.495	111.671	31.824
23	36	1	32.4886	1	0	0	2	1	0	6	143.676	112.227	31.449
23	36	1	32.4886	1	0	0	3	0	1	1	139.517	112.664	26.853
23	36	1	32.4886	1	0	0	3	0	1	2	148.496	113.094	35.402
23	36	1	32.4886	1	0	0	3	0	1	3	147.636	114.128	33.508
23	36	1	32.4886	1	0	0	3	0	1	4	146.1	113.099	33.001
23	36	1	32.4886	1	0	0	3	0	1	5	132.453	110.848	21.605
23	36	1	32.4886	1	0	0	3	0	1	6	149.288	114.324	34.964
23	36	1	32.4886	2	1	0	1	0	0	1	141.14	113.335	27.805
23	36	1	32.4886	2	1	0	1	0	0	2	141.438	115.187	26.251
23	36	1	32.4886	2	1	0	1	0	0	3	149.767	117.144	32.623
23	36	1	32.4886	2	1	0	1	0	0	4	150.351	117.352	32.999
23	36	1	32.4886	2	1	0	1	0	0	5	148.5	114.016	34.4839
23	36	1	32.4886	2	1	0	1	0	0	6	144.04	116.294	27.746
23	36	1	32.4886	2	1	0	2	1	0	1	145.227	115.203	30.024
23	36	1	32.4886	2	1	0	2	1	0	2	149.092	115.028	34.064
23	36	1	32.4886	2	1	0	2	1	0	3	147.389	113.815	33.574
23	36	1	32.4886	2	1	0	2	1	0	4	144.311	113.528	30.783
23	36	1	32.4886	2	1	0	2	1	0	5	147.127	113.77	33.357
23	36	1	32.4886	2	1	0	2	1	0	6	145.488	114.063	31.425
23	36	1	32.4886	2	1	0	3	0	1	1	141.884	114.106	27.778
23	36	1	32.4886	2	1	0	3	0	1	2	147.382	114.164	33.218
23	36	1	32.4886	2	1	0	3	0	1	3	142.102	113.573	28.529
23	36	1	32.4886	2	1	0	3	0	1	4	140.088	111.062	29.026
23	36	1	32.4886	2	1	0	3	0	1	5	143.808	112.635	31.173
23	36	1	32.4886	2	1	0	3	0	1	6	138.829	113.347	25.482
23	36	1	32.4886	3	0	1	1	0	0	1	121.186	106.154	15.032
23	36	1	32.4886	3	0	1	1	0	0	2	121.923	106.813	15.11
23	36	1	32.4886	3	0	1	1	0	0	3	123.14	105.439	17.701
23	36	1	32.4886	3	0	1	1	0	0	4	122.104	106.478	15.626
23	36	1	32.4886	3	0	1	1	0	0	5	129.2	108.235	20.965
23	36	1	32.4886	3	0	1	1	0	0	6	130.149	105.259	24.89
23	36	1	32.4886	3	0	1	2	1	0	1	130.062	107.442	22.62
23	36	1	32.4886	3	0	1	2	1	0	2	134.742	108.229	26.513
23	36	1	32.4886	3	0	1	2	1	0	3	132.074	105.91	26.164
23	36	1	32.4886	3	0	1	2	1	0	4	133.205	107.616	25.589
23	36	1	32.4886	3	0	1	2	1	0	5	131.116	107.704	23.412
23	36	1	32.4886	3	0	1	2	1	0	6	136.259	107.487	28.772
23	36	1	32.4886	3	0	1	3	0	1	1	130.022	109.62	20.402
23	36	1	32.4886	3	0	1	3	0	1	2	127.098	111.881	15.217
23	36	1	32.4886	3	0	1	3	0	1	3	135.369	111.981	23.388
23	36	1	32.4886	3	0	1	3	0	1	4	137.919	109.997	27.922
23	36	1	32.4886	3	0	1	3	0	1	5	135.303	111.524	23.779
23	36	1	32.4886	3	0	1	3	0	1	6	132.639	113.727	18.912
24	27	1	29.5092	1	0	0	1	0	0	1	135.631	105.508	30.123
24	27	1	29.5092	1	0	0	1	0	0	2	130.297	105.355	24.942
24	27	1	29.5092	1	0	0	1	0	0	3	133.564	107.068	26.496
24	27	1	29.5092	1	0	0	1	0	0	4	136.038	106.255	29.783
24	27	1	29.5092	1	0	0	1	0	0	5	131.753	104.512	27.241
24	27	1	29.5092	1	0	0	1	0	0	6	138.987	105.386	33.601
24	27	1	29.5092	1	0	0	2	1	0	1	124.381	102.67	21.711
24	27	1	29.5092	1	0	0	2	1	0	2	125.448	103.639	21.809
24	27	1	29.5092	1	0	0	2	1	0	3	129.133	105.103	24.03
24	27	1	29.5092	1	0	0	2	1	0	4	129.767	103.038	26.729
24	27	1	29.5092	1	0	0	2	1	0	5	124.777	104.209	20.568
24	27	1	29.5092	1	0	0	2	1	0	6	125.29	104.563	20.727
24	27	1	29.5092	1	0	0	3	0	1	1	130.897	104.272	26.625
24	27	1	29.5092	1	0	0	3	0	1	2	132.089	101.08	31.009
24	27	1	29.5092	1	0	0	3	0	1	3	130.061	98.277	31.784
24	27	1	29.5092	1	0	0	3	0	1	4	124.549	103.441	21.108
24	27	1	29.5092	1	0	0	3	0	1	5	132.829	102.499	30.33
24	27	1	29.5092	1	0	0	3	0	1	6	129.187	101.072	28.115
24	27	1	29.5092	2	1	0	1	0	0	1	136.932	108.518	28.414
24	27	1	29.5092	2	1	0	1	0	0	2	132.066	108.084	23.982
24	27	1	29.5092	2	1	0	1	0	0	3	138.345	107.587	30.758
24	27	1	29.5092	2	1	0	1	0	0	4	140	108.699	31.301
24	27	1	29.5092	2	1	0	1	0	0	5	136.577	108.232	28.345
24	27	1	29.5092	2	1	0	1	0	0	6	139	108.01	30.99
24	27	1	29.5092	2	1	0	2	1	0	1
24	27	1	29.5092	2	1	0	2	1	0	2
24	27	1	29.5092	2	1	0	2	1	0	3
24	27	1	29.5092	2	1	0	2	1	0	4
24	27	1	29.5092	2	1	0	2	1	0	5
24	27	1	29.5092	2	1	0	2	1	0	6
24	27	1	29.5092	2	1	0	3	0	1	1	127.664	100.125	27.539
24	27	1	29.5092	2	1	0	3	0	1	2	129.28	100.181	29.099
24	27	1	29.5092	2	1	0	3	0	1	3	133.789	99.444	34.345
24	27	1	29.5092	2	1	0	3	0	1	4	132.986	98.546	34.44
24	27	1	29.5092	2	1	0	3	0	1	5	127.585	99.31	28.275
24	27	1	29.5092	2	1	0	3	0	1	6	125.176	98.215	26.961
24	27	1	29.5092	3	0	1	1	0	0	1	120.95	93.493	27.457
24	27	1	29.5092	3	0	1	1	0	0	2	124.798	92.624	32.174
24	27	1	29.5092	3	0	1	1	0	0	3	123.105	93.409	29.696
24	27	1	29.5092	3	0	1	1	0	0	4	121.489	92.639	28.85
24	27	1	29.5092	3	0	1	1	0	0	5	121.754	92.886	28.868
24	27	1	29.5092	3	0	1	1	0	0	6	118.597	91.925	26.672
24	27	1	29.5092	3	0	1	2	1	0	1	127.793	101.241	26.552
24	27	1	29.5092	3	0	1	2	1	0	2	127.55	100.78	26.77
24	27	1	29.5092	3	0	1	2	1	0	3	126.152	101.395	24.757
24	27	1	29.5092	3	0	1	2	1	0	4	125.671	101.27	24.401
24	27	1	29.5092	3	0	1	2	1	0	5	120.087	103.15	16.937
24	27	1	29.5092	3	0	1	2	1	0	6	130.376	102.475	27.901
24	27	1	29.5092	3	0	1	3	0	1	1	125.775	102.341	23.434
24	27	1	29.5092	3	0	1	3	0	1	2	124.272	99.534	24.738
24	27	1	29.5092	3	0	1	3	0	1	3	124.47	100.875	23.595
24	27	1	29.5092	3	0	1	3	0	1	4	121.185	102.602	18.583
24	27	1	29.5092	3	0	1	3	0	1	5	127.757	101.725	26.032
24	27	1	29.5092	3	0	1	3	0	1	6	125.261	100.505	24.756
25	26	1	31.2394	1	0	0	1	0	0	1	120.529	105.082	15.447
25	26	1	31.2394	1	0	0	1	0	0	2	124.396	108.501	15.895
25	26	1	31.2394	1	0	0	1	0	0	3	125.608	105.947	19.661
25	26	1	31.2394	1	0	0	1	0	0	4	120.279	105.943	14.336
25	26	1	31.2394	1	0	0	1	0	0	5	125.397	108.377	17.02
25	26	1	31.2394	1	0	0	1	0	0	6	130.091	107.958	22.133
25	26	1	31.2394	1	0	0	2	1	0	1	132.877	110.402	22.475
25	26	1	31.2394	1	0	0	2	1	0	2	134.996	111.266	23.73
25	26	1	31.2394	1	0	0	2	1	0	3	129.758	110.488	19.27
25	26	1	31.2394	1	0	0	2	1	0	4	137.34	111.844	25.496
25	26	1	31.2394	1	0	0	2	1	0	5	135.401	110.275	25.126
25	26	1	31.2394	1	0	0	2	1	0	6	134.116	110.889	23.227
25	26	1	31.2394	1	0	0	3	0	1	1	136.336	102.941	33.395
25	26	1	31.2394	1	0	0	3	0	1	2	137.043	101.074	35.969
25	26	1	31.2394	1	0	0	3	0	1	3	132.417	102.749	29.668
25	26	1	31.2394	1	0	0	3	0	1	4	140.776	102.223	38.553
25	26	1	31.2394	1	0	0	3	0	1	5	136.901	103.682	33.219
25	26	1	31.2394	1	0	0	3	0	1	6	133.381	104.324	29.057
25	26	1	31.2394	2	1	0	1	0	0	1	129.808	107.735	22.073
25	26	1	31.2394	2	1	0	1	0	0	2	134.711	108.1	26.611
25	26	1	31.2394	2	1	0	1	0	0	3	130.105	105.596	24.509
25	26	1	31.2394	2	1	0	1	0	0	4	128.416	109.286	19.13
25	26	1	31.2394	2	1	0	1	0	0	5	128.803	110.485	18.318
25	26	1	31.2394	2	1	0	1	0	0	6	126.242	104.852	21.39
25	26	1	31.2394	2	1	0	2	1	0	1
25	26	1	31.2394	2	1	0	2	1	0	2
25	26	1	31.2394	2	1	0	2	1	0	3
25	26	1	31.2394	2	1	0	2	1	0	4
25	26	1	31.2394	2	1	0	2	1	0	5
25	26	1	31.2394	2	1	0	2	1	0	6
25	26	1	31.2394	2	1	0	3	0	1	1	126.991	104.291	22.7
25	26	1	31.2394	2	1	0	3	0	1	2	124.692	105.611	19.081
25	26	1	31.2394	2	1	0	3	0	1	3	124.269	103.53	20.739
25	26	1	31.2394	2	1	0	3	0	1	4	121.792	105.864	15.928
25	26	1	31.2394	2	1	0	3	0	1	5	131.922	106.335	25.587
25	26	1	31.2394	2	1	0	3	0	1	6	126.606	110.926	15.68
25	26	1	31.2394	3	0	1	1	0	0	1	120.496	105.296	15.2
25	26	1	31.2394	3	0	1	1	0	0	2	120.059	104.707	15.352
25	26	1	31.2394	3	0	1	1	0	0	3	121.699	105.075	16.624
25	26	1	31.2394	3	0	1	1	0	0	4	119.622	104.718	14.904
25	26	1	31.2394	3	0	1	1	0	0	5	119.53	106.114	13.416
25	26	1	31.2394	3	0	1	1	0	0	6	121.588	103.761	17.827
25	26	1	31.2394	3	0	1	2	1	0	1	125.782	103.666	22.116
25	26	1	31.2394	3	0	1	2	1	0	2	120.453	104.073	16.38
25	26	1	31.2394	3	0	1	2	1	0	3	121.062	103.069	17.993
25	26	1	31.2394	3	0	1	2	1	0	4	119.889	103.262	16.627
25	26	1	31.2394	3	0	1	2	1	0	5	119.263	106.044	13.219
25	26	1	31.2394	3	0	1	2	1	0	6	124.633	105.041	19.592
25	26	1	31.2394	3	0	1	3	0	1	1	129.726	109.405	20.321
25	26	1	31.2394	3	0	1	3	0	1	2	128.022	111.269	16.753
25	26	1	31.2394	3	0	1	3	0	1	3	130.658	109.366	21.292
25	26	1	31.2394	3	0	1	3	0	1	4	128.86	109.84	19.02
25	26	1	31.2394	3	0	1	3	0	1	5	127.744	111.408	16.336
25	26	1	31.2394	3	0	1	3	0	1	6	130.702	109.108	21.594
26	55	1	37.2615	1	0	0	1	0	0	1	126.918	102.994	23.924
26	55	1	37.2615	1	0	0	1	0	0	2	119.562	102.536	17.026
26	55	1	37.2615	1	0	0	1	0	0	3	120.202	102.472	17.73
26	55	1	37.2615	1	0	0	1	0	0	4	120.285	102.967	17.318
26	55	1	37.2615	1	0	0	1	0	0	5	123.207	102.214	20.993
26	55	1	37.2615	1	0	0	1	0	0	6	121.537	100.534	21.003
26	55	1	37.2615	1	0	0	2	1	0	1	117.309	104.874	12.435
26	55	1	37.2615	1	0	0	2	1	0	2	116.69	104.022	12.668
26	55	1	37.2615	1	0	0	2	1	0	3	115.256	106.63	8.626
26	55	1	37.2615	1	0	0	2	1	0	4	121.587	105.452	16.135
26	55	1	37.2615	1	0	0	2	1	0	5	116.045	107.672	8.373
26	55	1	37.2615	1	0	0	2	1	0	6	118.933	103.927	15.006
26	55	1	37.2615	1	0	0	3	0	1	1	134.577	113.845	20.732
26	55	1	37.2615	1	0	0	3	0	1	2	134.376	115.372	19.004
26	55	1	37.2615	1	0	0	3	0	1	3	137.512	114.697	22.815
26	55	1	37.2615	1	0	0	3	0	1	4	135.326	115.083	20.243
26	55	1	37.2615	1	0	0	3	0	1	5	134.64	114.75	19.89
26	55	1	37.2615	1	0	0	3	0	1	6	131.978	113.104	18.874
26	55	1	37.2615	2	1	0	1	0	0	1	138.949	113.471	25.478
26	55	1	37.2615	2	1	0	1	0	0	2	139.335	111.012	28.323
26	55	1	37.2615	2	1	0	1	0	0	3	133.977	111.941	22.036
26	55	1	37.2615	2	1	0	1	0	0	4	139.737	110.378	29.359
26	55	1	37.2615	2	1	0	1	0	0	5	138.197	110.041	28.156
26	55	1	37.2615	2	1	0	1	0	0	6	136.254	110.381	25.873
26	55	1	37.2615	2	1	0	2	1	0	1
26	55	1	37.2615	2	1	0	2	1	0	2
26	55	1	37.2615	2	1	0	2	1	0	3
26	55	1	37.2615	2	1	0	2	1	0	4
26	55	1	37.2615	2	1	0	2	1	0	5
26	55	1	37.2615	2	1	0	2	1	0	6
26	55	1	37.2615	2	1	0	3	0	1	1	137.948	108.614	29.334
26	55	1	37.2615	2	1	0	3	0	1	2	134.744	110.211	24.533
26	55	1	37.2615	2	1	0	3	0	1	3	134.81	107.679	27.131
26	55	1	37.2615	2	1	0	3	0	1	4	134.801	108.61	26.191
26	55	1	37.2615	2	1	0	3	0	1	5	131.957	108.249	23.708
26	55	1	37.2615	2	1	0	3	0	1	6	138.019	108.683	29.336
26	55	1	37.2615	3	0	1	1	0	0	1	113.687	94.33	19.357
26	55	1	37.2615	3	0	1	1	0	0	2	111.766	93.032	18.734
26	55	1	37.2615	3	0	1	1	0	0	3	115.082	94.43	20.652
26	55	1	37.2615	3	0	1	1	0	0	4	115.064	91.913	23.151
26	55	1	37.2615	3	0	1	1	0	0	5	113.363	93.78	19.583
26	55	1	37.2615	3	0	1	1	0	0	6	115.159	92.297	22.862
26	55	1	37.2615	3	0	1	2	1	0	1	124.402	106.314	18.088
26	55	1	37.2615	3	0	1	2	1	0	2	126.315	110.18	16.135
26	55	1	37.2615	3	0	1	2	1	0	3	131.004	108.235	22.769
26	55	1	37.2615	3	0	1	2	1	0	4	129.39	109.372	20.018
26	55	1	37.2615	3	0	1	2	1	0	5	132.11	107.112	24.998
26	55	1	37.2615	3	0	1	2	1	0	6	126.603	107.399	19.204
26	55	1	37.2615	3	0	1	3	0	1	1	129.728	109.403	20.325
26	55	1	37.2615	3	0	1	3	0	1	2	127.77	111.268	16.502
26	55	1	37.2615	3	0	1	3	0	1	3	130.666	109.375	21.291
26	55	1	37.2615	3	0	1	3	0	1	4	128.862	109.848	19.014
26	55	1	37.2615	3	0	1	3	0	1	5	127.749	111.415	16.334
26	55	1	37.2615	3	0	1	3	0	1	6	130.702	109.114	21.588
27	22	1	22.244	1	0	0	1	0	0	1	114.592	100.785	13.807
27	22	1	22.244	1	0	0	1	0	0	2	117.846	101.808	16.038
27	22	1	22.244	1	0	0	1	0	0	3	117.648	100.304	17.344
27	22	1	22.244	1	0	0	1	0	0	4	120.669	99.277	21.392
27	22	1	22.244	1	0	0	1	0	0	5	117.647	97.836	19.811
27	22	1	22.244	1	0	0	1	0	0	6	121.948	98.318	23.63
27	22	1	22.244	1	0	0	2	1	0	1	126.105	99.336	26.769
27	22	1	22.244	1	0	0	2	1	0	2	120.355	102.919	17.436
27	22	1	22.244	1	0	0	2	1	0	3	123.43	101.621	21.809
27	22	1	22.244	1	0	0	2	1	0	4	124.769	100.433	24.336
27	22	1	22.244	1	0	0	2	1	0	5	122.06	96.84	25.22
27	22	1	22.244	1	0	0	2	1	0	6	125.863	99.002	26.861
27	22	1	22.244	1	0	0	3	0	1	1	112.893	92.24	20.653
27	22	1	22.244	1	0	0	3	0	1	2	113.865	92.27	21.595
27	22	1	22.244	1	0	0	3	0	1	3	115.223	91.873	23.35
27	22	1	22.244	1	0	0	3	0	1	4	125.865	91.069	34.796
27	22	1	22.244	1	0	0	3	0	1	5	117.939	90.822	27.117
27	22	1	22.244	1	0	0	3	0	1	6	117.051	93.023	24.028
27	22	1	22.244	2	1	0	1	0	0	1	134.331	110.219	24.112
27	22	1	22.244	2	1	0	1	0	0	2	135.979	108.311	27.668
27	22	1	22.244	2	1	0	1	0	0	3	130.235	109.53	20.705
27	22	1	22.244	2	1	0	1	0	0	4	131.344	108.987	22.357
27	22	1	22.244	2	1	0	1	0	0	5	131.344	107.672	23.672
27	22	1	22.244	2	1	0	1	0	0	6	129.574	107.992	21.582
27	22	1	22.244	2	1	0	2	1	0	1	132.499	106.765	25.734
27	22	1	22.244	2	1	0	2	1	0	2	131.753	106.795	24.958
27	22	1	22.244	2	1	0	2	1	0	3	131.752	106.728	25.024
27	22	1	22.244	2	1	0	2	1	0	4	131.827	105.66	26.167
27	22	1	22.244	2	1	0	2	1	0	5	133.169	106.552	26.617
27	22	1	22.244	2	1	0	2	1	0	6	133.208	108.279	24.929
27	22	1	22.244	2	1	0	3	0	1	1	127.914	101.62	26.294
27	22	1	22.244	2	1	0	3	0	1	2	128.289	100.323	27.966
27	22	1	22.244	2	1	0	3	0	1	3	129.571	98.924	30.647
27	22	1	22.244	2	1	0	3	0	1	4	128.326	100.24	28.086
27	22	1	22.244	2	1	0	3	0	1	5	129.903	103.348	26.555
27	22	1	22.244	2	1	0	3	0	1	6	127.959	101.678	26.281
27	22	1	22.244	3	0	1	1	0	0	1	113.261	91.384	21.877
27	22	1	22.244	3	0	1	1	0	0	2	113.252	90.304	22.948
27	22	1	22.244	3	0	1	1	0	0	3	112.675	91.419	21.256
27	22	1	22.244	3	0	1	1	0	0	4	110.114	91.432	18.682
27	22	1	22.244	3	0	1	1	0	0	5	111.272	90.282	20.99
27	22	1	22.244	3	0	1	1	0	0	6	110.557	90.134	20.423
27	22	1	22.244	3	0	1	2	1	0	1	133.378	110.037	23.341
27	22	1	22.244	3	0	1	2	1	0	2	133.599	110.376	23.223
27	22	1	22.244	3	0	1	2	1	0	3	136.006	109.554	26.452
27	22	1	22.244	3	0	1	2	1	0	4	135.109	106.894	28.215
27	22	1	22.244	3	0	1	2	1	0	5	132.166	107.007	25.159
27	22	1	22.244	3	0	1	2	1	0	6	133.031	107.183	25.848
27	22	1	22.244	3	0	1	3	0	1	1	132.226	106.133	26.093
27	22	1	22.244	3	0	1	3	0	1	2	130.967	106.016	24.951
27	22	1	22.244	3	0	1	3	0	1	3	127.521	104.454	23.067
27	22	1	22.244	3	0	1	3	0	1	4	124.657	104.672	19.985
27	22	1	22.244	3	0	1	3	0	1	5	127.625	108.368	19.257
27	22	1	22.244	3	0	1	3	0	1	6	129.087	104.9	24.187
28	44	1	24.9649	1	0	0	1	0	0	1	124.926	108.812	16.114
28	44	1	24.9649	1	0	0	1	0	0	2	124.318	107.905	16.413
28	44	1	24.9649	1	0	0	1	0	0	3	126.637	107.231	19.406
28	44	1	24.9649	1	0	0	1	0	0	4	125.93	107.491	18.439
28	44	1	24.9649	1	0	0	1	0	0	5	125.262	97.048	28.214
28	44	1	24.9649	1	0	0	1	0	0	6	130.275	108.401	21.874
28	44	1	24.9649	1	0	0	2	1	0	1	125.051	108.375	16.676
28	44	1	24.9649	1	0	0	2	1	0	2	123.826	108.486	15.34
28	44	1	24.9649	1	0	0	2	1	0	3	124.566	108.619	15.947
28	44	1	24.9649	1	0	0	2	1	0	4	124.346	110.164	14.182
28	44	1	24.9649	1	0	0	2	1	0	5	127.944	106.91	21.034
28	44	1	24.9649	1	0	0	2	1	0	6	121.37	107.239	14.131
28	44	1	24.9649	1	0	0	3	0	1	1	129.249	112.115	17.134
28	44	1	24.9649	1	0	0	3	0	1	2	129.877	113.382	16.495
28	44	1	24.9649	1	0	0	3	0	1	3	130.997	115.177	15.82
28	44	1	24.9649	1	0	0	3	0	1	4	131.172	112.509	18.663
28	44	1	24.9649	1	0	0	3	0	1	5	130.008	112.239	17.769
28	44	1	24.9649	1	0	0	3	0	1	6	129.75	114.768	14.982
28	44	1	24.9649	2	1	0	1	0	0	1	121.202	104.837	16.365
28	44	1	24.9649	2	1	0	1	0	0	2	123.889	102.474	21.415
28	44	1	24.9649	2	1	0	1	0	0	3	120.964	104.336	16.628
28	44	1	24.9649	2	1	0	1	0	0	4	119.396	103.013	16.383
28	44	1	24.9649	2	1	0	1	0	0	5	122.853	102.548	20.305
28	44	1	24.9649	2	1	0	1	0	0	6	121.078	103.104	17.974
28	44	1	24.9649	2	1	0	2	1	0	1	122.526	107.26	15.266
28	44	1	24.9649	2	1	0	2	1	0	2	121.888	107.696	14.192
28	44	1	24.9649	2	1	0	2	1	0	3	124.605	105.973	18.632
28	44	1	24.9649	2	1	0	2	1	0	4	124.196	106.202	17.994
28	44	1	24.9649	2	1	0	2	1	0	5	123.963	105.417	18.546
28	44	1	24.9649	2	1	0	2	1	0	6	121.346	104.969	16.377
28	44	1	24.9649	2	1	0	3	0	1	1	129.428	105.554	23.874
28	44	1	24.9649	2	1	0	3	0	1	2	127.612	106.146	21.466
28	44	1	24.9649	2	1	0	3	0	1	3	129.649	106.039	23.61
28	44	1	24.9649	2	1	0	3	0	1	4	127.646	103.915	23.731
28	44	1	24.9649	2	1	0	3	0	1	5	127.109	105.723	21.386
28	44	1	24.9649	2	1	0	3	0	1	6	125.199	107.625	17.574
28	44	1	24.9649	3	0	1	1	0	0	1	120.963	108.836	12.127
28	44	1	24.9649	3	0	1	1	0	0	2	122.572	106.744	15.828
28	44	1	24.9649	3	0	1	1	0	0	3	118.798	105.81	12.988
28	44	1	24.9649	3	0	1	1	0	0	4	118.029	107.286	10.743
28	44	1	24.9649	3	0	1	1	0	0	5	117.666	105.552	12.114
28	44	1	24.9649	3	0	1	1	0	0	6	117.822	106.884	10.938
28	44	1	24.9649	3	0	1	2	1	0	1	114.567	99.359	15.208
28	44	1	24.9649	3	0	1	2	1	0	2	117.426	99.427	17.999
28	44	1	24.9649	3	0	1	2	1	0	3	116.25	98.331	17.919
28	44	1	24.9649	3	0	1	2	1	0	4	115.77	98.233	17.537
28	44	1	24.9649	3	0	1	2	1	0	5	117.108	98.053	19.055
28	44	1	24.9649	3	0	1	2	1	0	6	116.504	97.8	18.704
28	44	1	24.9649	3	0	1	3	0	1	1	123.599	105.956	17.643
28	44	1	24.9649	3	0	1	3	0	1	2	122.684	105.811	16.873
28	44	1	24.9649	3	0	1	3	0	1	3	122.596	105.257	17.339
28	44	1	24.9649	3	0	1	3	0	1	4	123.864	105.944	17.92
28	44	1	24.9649	3	0	1	3	0	1	5	122.348	103.56	18.788
28	44	1	24.9649	3	0	1	3	0	1	6	119.732	104.543	15.189
29	24	1	23.7387	1	0	0	1	0	0	1	126.824	104.291	22.533
29	24	1	23.7387	1	0	0	1	0	0	2	124.299	105.149	19.15
29	24	1	23.7387	1	0	0	1	0	0	3	125.532	104.119	21.413
29	24	1	23.7387	1	0	0	1	0	0	4	128.443	103.252	25.191
29	24	1	23.7387	1	0	0	1	0	0	5	126.679	105.486	21.193
29	24	1	23.7387	1	0	0	1	0	0	6	131.485	106.649	24.836
29	24	1	23.7387	1	0	0	2	1	0	1	121.281	103.608	17.673
29	24	1	23.7387	1	0	0	2	1	0	2	122.935	101.239	21.696
29	24	1	23.7387	1	0	0	2	1	0	3	121.302	102.364	18.938
29	24	1	23.7387	1	0	0	2	1	0	4	124.583	102.558	22.025
29	24	1	23.7387	1	0	0	2	1	0	5	123.534	103.112	20.422
29	24	1	23.7387	1	0	0	2	1	0	6	124.621	103.23	21.391
29	24	1	23.7387	1	0	0	3	0	1	1	123.02	97.151	25.869
29	24	1	23.7387	1	0	0	3	0	1	2	124.012	95.804	28.208
29	24	1	23.7387	1	0	0	3	0	1	3	119.512	98.147	21.365
29	24	1	23.7387	1	0	0	3	0	1	4	122.037	97.951	24.086
29	24	1	23.7387	1	0	0	3	0	1	5	125.124	98.125	26.999
29	24	1	23.7387	1	0	0	3	0	1	6
29	24	1	23.7387	2	1	0	1	0	0	1	133.772	104.611	29.161
29	24	1	23.7387	2	1	0	1	0	0	2	134.353	104.598	29.755
29	24	1	23.7387	2	1	0	1	0	0	3	133.114	101.308	31.806
29	24	1	23.7387	2	1	0	1	0	0	4	131.914	104.51	27.404
29	24	1	23.7387	2	1	0	1	0	0	5	132.389	101.88	30.509
29	24	1	23.7387	2	1	0	1	0	0	6	133.631	102.962	30.669
29	24	1	23.7387	2	1	0	2	1	0	1
29	24	1	23.7387	2	1	0	2	1	0	2
29	24	1	23.7387	2	1	0	2	1	0	3
29	24	1	23.7387	2	1	0	2	1	0	4
29	24	1	23.7387	2	1	0	2	1	0	5
29	24	1	23.7387	2	1	0	2	1	0	6
29	24	1	23.7387	2	1	0	3	0	1	1	129.864	97.98	31.884
29	24	1	23.7387	2	1	0	3	0	1	2	128.877	99.338	29.539
29	24	1	23.7387	2	1	0	3	0	1	3	128.487	98.874	29.613
29	24	1	23.7387	2	1	0	3	0	1	4	129.14	99.912	29.228
29	24	1	23.7387	2	1	0	3	0	1	5	126.039	98.017	28.022
29	24	1	23.7387	2	1	0	3	0	1	6	127.387	98.263	29.124
29	24	1	23.7387	3	0	1	1	0	0	1	136.003	105.825	30.178
29	24	1	23.7387	3	0	1	1	0	0	2	135.733	107.062	28.671
29	24	1	23.7387	3	0	1	1	0	0	3	136.031	105.042	30.989
29	24	1	23.7387	3	0	1	1	0	0	4	138.206	104.874	33.332
29	24	1	23.7387	3	0	1	1	0	0	5	137.565	105.673	31.892
29	24	1	23.7387	3	0	1	1	0	0	6	137.017	105.673	31.344
29	24	1	23.7387	3	0	1	2	1	0	1	129.926	108.104	21.822
29	24	1	23.7387	3	0	1	2	1	0	2	126.188	106.424	19.764
29	24	1	23.7387	3	0	1	2	1	0	3	123.162	107.291	15.871
29	24	1	23.7387	3	0	1	2	1	0	4	127.097	105.972	21.125
29	24	1	23.7387	3	0	1	2	1	0	5	126.937	106.903	20.034
29	24	1	23.7387	3	0	1	2	1	0	6	128.367	106.305	22.062
29	24	1	23.7387	3	0	1	3	0	1	1	124.495	105.355	19.14
29	24	1	23.7387	3	0	1	3	0	1	2	122.716	107.896	14.82
29	24	1	23.7387	3	0	1	3	0	1	3	128.423	104.824	23.599
29	24	1	23.7387	3	0	1	3	0	1	4	119.255	103.697	15.558
29	24	1	23.7387	3	0	1	3	0	1	5	123.369	105.679	17.69
29	24	1	23.7387	3	0	1	3	0	1	6	124.162	106.984	17.178
30	32	1	27.7344	1	0	0	1	0	0	1	133.68	110.675	23.005
30	32	1	27.7344	1	0	0	1	0	0	2	134.478	107.525	26.953
30	32	1	27.7344	1	0	0	1	0	0	3	130.473	109.81	20.663
30	32	1	27.7344	1	0	0	1	0	0	4	126.945	110.894	16.051
30	32	1	27.7344	1	0	0	1	0	0	5	132.456	108.982	23.474
30	32	1	27.7344	1	0	0	1	0	0	6	133.619	110.011	23.608
30	32	1	27.7344	1	0	0	2	1	0	1	127.789	116.61	11.179
30	32	1	27.7344	1	0	0	2	1	0	2	127.704	119.11	8.594
30	32	1	27.7344	1	0	0	2	1	0	3	129.01	118.659	10.351
30	32	1	27.7344	1	0	0	2	1	0	4	131.207	116.612	14.595
30	32	1	27.7344	1	0	0	2	1	0	5	127.23	118.038	9.192
30	32	1	27.7344	1	0	0	2	1	0	6	130.136	117.372	12.764
30	32	1	27.7344	1	0	0	3	0	1	1	120.528	98.735	21.793
30	32	1	27.7344	1	0	0	3	0	1	2	118.011	97.737	20.274
30	32	1	27.7344	1	0	0	3	0	1	3	116.704	100.109	16.595
30	32	1	27.7344	1	0	0	3	0	1	4	119.056	98.193	20.863
30	32	1	27.7344	1	0	0	3	0	1	5	116.634	101.859	14.775
30	32	1	27.7344	1	0	0	3	0	1	6	122.993	99.16	23.833
30	32	1	27.7344	2	1	0	1	0	0	1	128.097	109.61	18.487
30	32	1	27.7344	2	1	0	1	0	0	2	133.632	108.744	24.888
30	32	1	27.7344	2	1	0	1	0	0	3	138.107	109.968	28.139
30	32	1	27.7344	2	1	0	1	0	0	4	133.514	109.034	24.48
30	32	1	27.7344	2	1	0	1	0	0	5	133.132	108.525	24.607
30	32	1	27.7344	2	1	0	1	0	0	6	138.668	108.76	29.908
30	32	1	27.7344	2	1	0	2	1	0	1	111.331	100.087	11.244
30	32	1	27.7344	2	1	0	2	1	0	2	114.991	97.991	17
30	32	1	27.7344	2	1	0	2	1	0	3	114.385	99.226	15.159
30	32	1	27.7344	2	1	0	2	1	0	4	114.448	99.048	15.4
30	32	1	27.7344	2	1	0	2	1	0	5	115.486	99.346	16.14
30	32	1	27.7344	2	1	0	2	1	0	6	115.073	98.984	16.089
30	32	1	27.7344	2	1	0	3	0	1	1	116.068	95.957	20.111
30	32	1	27.7344	2	1	0	3	0	1	2	118.663	95.958	22.705
30	32	1	27.7344	2	1	0	3	0	1	3	116.412	97.227	19.185
30	32	1	27.7344	2	1	0	3	0	1	4	122.213	96.141	26.072
30	32	1	27.7344	2	1	0	3	0	1	5	117.577	97.588	19.989
30	32	1	27.7344	2	1	0	3	0	1	6	117.96	96.207	21.753
30	32	1	27.7344	3	0	1	1	0	0	1	121.058	101.923	19.135
30	32	1	27.7344	3	0	1	1	0	0	2	121.374	103.044	18.33
30	32	1	27.7344	3	0	1	1	0	0	3	133.897	102.443	31.454
30	32	1	27.7344	3	0	1	1	0	0	4	122.92	101.304	21.616
30	32	1	27.7344	3	0	1	1	0	0	5	122.052	102.73	19.322
30	32	1	27.7344	3	0	1	1	0	0	6	122.92	100.936	21.984
30	32	1	27.7344	3	0	1	2	1	0	1	127.838	115.868	11.97
30	32	1	27.7344	3	0	1	2	1	0	2	128.342	115.562	12.78
30	32	1	27.7344	3	0	1	2	1	0	3	127.144	115.95	11.194
30	32	1	27.7344	3	0	1	2	1	0	4	127.073	116.47	10.603
30	32	1	27.7344	3	0	1	2	1	0	5	125.742	115.138	10.604
30	32	1	27.7344	3	0	1	2	1	0	6	125.099	117.143	7.956
30	32	1	27.7344	3	0	1	3	0	1	1	124.495	105.355	19.14
30	32	1	27.7344	3	0	1	3	0	1	2	122.716	108.015	14.701
30	32	1	27.7344	3	0	1	3	0	1	3	128.862	105.664	23.198
30	32	1	27.7344	3	0	1	3	0	1	4	119.755	103.697	16.058
30	32	1	27.7344	3	0	1	3	0	1	5	123.369	105.609	17.76
30	32	1	27.7344	3	0	1	3	0	1	6	124.162	106.984	17.178

## Sheet: Sheet2
Age	Gen	BMI
31	1	22.4675	1
39	1	32.3437	2
56	1	21.1927	3
20	1	18.4049	4
37	0	26.7712	5
44	1	32.7694	6
26	0	24.179	7
47	1	38.0142	8
45	0	26.2202	9
29	0	18.7242	10
29	0	25.0928	11
38	1	20.8429	12
59	0	22.6627	13
25	1	37.5149	14
39	1	24.0138	15
46	0	29.3524	16
20	1	19.3294	17
29	0	27.4361	18
33	1	30.0947	19
40	0	22.3863	20
21	1	21.9213	21
30	1	22.8624	22
36	1	32.4886	23
27	1	29.5092	24
26	1	31.2394	25
55	1	37.2615	26
22	1	22.244	27
44	1	24.9649	28
24	1	23.7387	29
32	1	27.7344	30
